# Linker histones regulate fine-scale chromatin organization and modulate developmental decisions in Arabidopsis

Kinga Rutowicz<sup>1,#</sup>, Maciej Lirski<sup>2,#</sup>, Benoît Mermaz<sup>1,3</sup>, Jasmin Schubert<sup>1</sup>, Gianluca Teano<sup>4</sup>, Imen Mestiri<sup>4</sup>, Magdalena A. Kroteń<sup>5</sup>, Tohnyui Ndinyanka Fabrice<sup>1</sup>, Simon Fritz<sup>1</sup>, Stefan Grob<sup>1</sup>, Christoph Ringli<sup>1</sup>, Lusik Cherkezyan<sup>6</sup>, Fredy Barneche<sup>4</sup>, Andrzej Jerzmanowski<sup>2,7</sup> and Célia Baroux<sup>1</sup>

<sup>1</sup> Institute of Plant and Microbial Biology, Zürich-Basel Plant Science Center, University of Zürich, Switzerland

<sup>2</sup> Institute of Biochemistry and Biophysics, Polish Academy of Sciences, Pawlinskiego 5a, 02-106 Warsaw, Warsaw, Poland

<sup>3</sup> Institut de Biologie de l'Ecole Normale Supérieure (IBENS), Ecole normale supérieure, CNRS, INSERM, PSL Research University, 75005 Paris, France

<sup>4</sup> Département de Biologie, IBENS, Ecole Normale Supérieure, CNRS, INSERM, PSL Research University, 46 rue d'Ulm, F-75005, Paris, France

<sup>5</sup> College of Inter-Faculty Individual Studies in Mathematics and Natural Sciences, University of Warsaw, 02-089 Warsaw, Poland

<sup>6</sup> Department of Biomedical Engineering, Northwestern University, Evanston, Illinois 60208, USA

<sup>7</sup> Faculty of Biology, University of Warsaw, Pawlinskiego 5a, 02-106 Warsaw, Warsaw, Poland

# equal contribution

**List of emails to all co-authors:**

[kinga.rutowicz@uzh.ch](mailto:kinga.rutowicz@uzh.ch), [mlirski@poczta.onet.pl](mailto:mlirski@poczta.onet.pl), [mermazb@gmail.com](mailto:mermazb@gmail.com), [jasminschubert@msn.com](mailto:jasminschubert@msn.com),  
[teano@biologie.ens.fr](mailto:teano@biologie.ens.fr), [mestiri@biologie.ens.fr](mailto:mestiri@biologie.ens.fr), [mkroten@gmail.com](mailto:mkroten@gmail.com), [nf.tohnyui@unibas.ch](mailto:nf.tohnyui@unibas.ch),  
[simon.fritz@botinst.uzh.ch](mailto:simon.fritz@botinst.uzh.ch), [stefan@grob.org](mailto:stefan@grob.org), [chringli@botinst.uzh.ch](mailto:chringli@botinst.uzh.ch), [barneche@biologie.ens.fr](mailto:barneche@biologie.ens.fr),  
[andyj@ibb.waw.pl](mailto:andyj@ibb.waw.pl), [cbaroux@botinst.uzh.ch](mailto:cbaroux@botinst.uzh.ch), [Lusik@u.northwestern.edu](mailto:Lusik@u.northwestern.edu),

**Keywords**

Linker histones, H1, chromatin, heterochromatin, histone methylation, developmental transitions,

**Running title**

Linker histones secure robust developmental transitions.

**Correspondence**

Célia Baroux, [cbaroux@botinst.uzh.ch](mailto:cbaroux@botinst.uzh.ch), Andrzej Jerzmanowski, [andyj@ibb.waw.pl](mailto:andyj@ibb.waw.pl)

## 1 **Abstract**

2 Chromatin in eukaryotes provides a tunable platform to control gene expression and convey an  
3 epigenetic memory throughout cell divisions. H1 linker histones are abundant components with an  
4 intrinsic potential in influencing chromatin structure and function. We detail the impact of H1 depletion  
5 in Arabidopsis on fine-scale chromatin organization, transcription and development. While required for  
6 chromocenter assembly, H1s are dispensable for transposable element (TE) silencing and peripheral  
7 positioning of heterochromatin. In euchromatin, H1 regulates nucleosome density, mobility, and regular  
8 distribution of nanoscale chromatin domains. While necessary to maintain epigenetic patterns, H1 only  
9 moderately affects transcription. Its depletion is associated with failures in transitional fate changes  
10 such as lateral root initiation, root hair production, stomata patterning but also flowering and dormancy  
11 regulation. Therefore, Arabidopsis H1 variants are chromatin architects mediating nano- and microscale  
12 levels-of-organization operating downstream of epigenetic and transcriptional establishment processes  
13 and contribute to epigenetic reorientations in developmental transitions.

## 14 **Introduction**

15 Linker histones (H1) are one of the major components of plant and animal chromatin. H1 (referring to  
16 the entire variants family) appeared early during evolution, with lysine-rich proto-linker histones found  
17 in the most ancestral eukaryotes (Kasinsky, Lewis et al. 2001). In contrast to the core nucleosomal  
18 constituents, however, H1 is the most divergent class of histones (Kasinsky, Lewis et al. 2001). H1  
19 typically possess a conserved tripartite structure composed of a short and flexible N-terminal tail, a  
20 structured globular domain (GH1) which interacts with a nucleosome dyad and a structurally disordered,  
21 lysine-rich (highly basic) C-terminal tail. The C-terminal tail, which varies in length and composition  
22 among variants and organisms, interacts with internucleosomal linker DNA and draws adjacent

23 nucleosomes together thus conferring the chromatin compaction potential of H1 variants (Zhou, Feng et  
24 al. 2013, Bednar, Garcia-Saez et al. 2017). Several variants can co-exist in one cell playing then  
25 redundant and specific roles in chromatin structure and functions (reviewed in (Fyodorov, Zhou et al.  
26 2018)). H1 proteins constitute a highly mobile fraction of the chromatin and their apparent constitutive  
27 presence results from a steady-state level of dynamic binding (Bustin, Catez et al. 2005). H1 variants  
28 differ in DNA and nucleosome binding properties, regulating both chromatin compaction at mitosis as  
29 well as nucleosomal spacing at interphase (reviewed in (Hergeth and Schneider 2015)). The structural  
30 role of H1 in chromatin organization has an influence on several genome functions such as gene  
31 regulation, DNA replication, chromosome segregation and DNA repair (reviewed in (Almeida,  
32 Fernandez-Justel et al. 2018, Fyodorov, Zhou et al. 2018)). Yet, the functional impact of H1 depletion  
33 shows a large variability depending on H1 variants and organisms. While H1 seems dispensable in  
34 *Tetrahymena thermophila*, yeast, and the fungus *Ascobolus immersus* (Shen, Yu et al. 1995, Ushinsky,  
35 Bussey et al. 1997, Patterton, Landel et al. 1998, Ausio 2000), its loss-of-function has a variable impact in  
36 higher organisms, ranging from developmental alterations in *Caenorhabditis elegans* and the flowering  
37 plant *Arabidopsis thaliana* (Jedrusik and Schulze 2001, Wierzbicki and Jerzmanowski 2005) to early  
38 lethality in mouse and *Drosophila* (Fan, Nikitina et al. 2005, Lu, Wontakal et al. 2009). Generally, H1 has  
39 been implicated in the control of genetic programs during development and differentiation (Kasinsky,  
40 Lewis et al. 2001, Hergeth and Schneider 2015, Pan and Fan 2016). Yet, H1 moderately impacts on global  
41 gene expression in mammalian cell cultures (Fan, Nikitina et al. 2005, Sancho, Diani et al. 2008, Zhang,  
42 Cooke et al. 2012, Geeven, Zhu et al. 2015) still affecting the expression of pluripotency genes (Zhang,  
43 Cooke et al. 2012). This is in line with the implication of H1 in regulating nucleosomal density and RNA  
44 Polymerase II accessibility in pluripotent cells (Christophorou, Castelo-Branco et al. 2014, Ricci, Manzo et  
45 al. 2015). H1 has also been shown to have a role in controlling epigenetic marks such as DNA  
46 methylation (Fan, Nikitina et al. 2005, Yang, Kim et al. 2013, Seymour, Ji et al. 2016) and histone H3

47 methylation (Lu, Wontakal et al. 2013, Yang, Kim et al. 2013, Geeven, Zhu et al. 2015). The intrinsic role  
48 of H1 on chromatin organization and yet moderate impact of its depletion on cell viability creates an  
49 apparent paradox that was early recognized (Bustin, Catez et al. 2005).

50 The plant kingdom possesses H1 variants that can be traced to earliest land plants (Kotlinski, Knizewski  
51 et al. 2017). The flowering plant *Arabidopsis* possesses three canonical H1 variants (Wierzbicki and  
52 Jerzmanowski 2005, Kotlinski, Knizewski et al. 2017). Two of them, H1.1 and H1.2 are canonical variants  
53 expressed throughout the plant except in cells of the reproductive lineage (She, Grimanelli et al. 2013,  
54 She and Baroux 2015, Ingouff, Selles et al. 2017). H1.3 is a stress-inducible variant contributing to  
55 physiological adaptation (Rutowicz, Puzio et al. 2015). Previous studies based on different reverse  
56 genetics approaches reported a variable impact of H1 depletion. RNAi-based downregulation of all three  
57 variants induces severe developmental aberration and sterility (Wierzbicki and Jerzmanowski 2005). By  
58 contrast, a stepwise introgression of insertional (T-DNA) genetic lesions generated viable plants, either  
59 double (*h1.1h1.2*, (Zemach, Kim et al. 2013)) or triple (*h1.1h1.2h1.3*, (She, Grimanelli et al. 2013,  
60 Rutowicz, Puzio et al. 2015) mutant lines. The triple mutant (thereafter called *3h1*) shows no detectable  
61 levels of H1 protein in immunostaining and immunoblot (She, Grimanelli et al. 2013), yet the plants are  
62 viable and do not exhibit dramatic morphological alterations. Possibly, and as already suggested for  
63 other organisms and earlier for *Arabidopsis*, the lack of H1 variants may be partially compensated  
64 (Jerzmanowski, Przewłoka et al. 2000, Bustin, Catez et al. 2005) for example by HMG-related proteins  
65 that are abundantly present in plant cells (Launholt, Gronlund et al. 2007).

66 H1 variants (thereafter referred collectively to as H1, for simplicity) are distributed across the genome,  
67 spanning both heterochromatin and euchromatin chromosomal domains (Rutowicz, Puzio et al. 2015).  
68 H1.1 and H1.2 variants are enriched at the 3' and 5' ends of TEs and over gene bodies anti-correlating  
69 with gene expression and H3K4me3 levels (Rutowicz, Puzio et al. 2015). Like in animals, *Arabidopsis* H1s  
70 have been recognized to have a dramatic impact on DNA methylation, altering patterns primarily but

71 not exclusively in heterochromatin, and affecting all sequence contexts (Wierzbicki and Jerzmanowski  
72 2005, Rea, Zheng et al. 2012, Zemach, Kim et al. 2013). However, the specific role of H1 on chromatin  
73 organization and function in plants remains elusive. This prompted us to investigate the detailed  
74 structure, composition and organization of H1-depleted chromatin in somatic plant cells. We found that  
75 H1 has distinct roles in heterochromatin and euchromatin organization at the microscopic and  
76 nanoscale level. Notably, H1 is necessary to maintain heterochromatin organization but dispensable for  
77 peripheral localization and epigenetic silencing of heterochromatin and has only a moderate influence  
78 on nucleosomal density. In euchromatin, H1 depletion results in a quantifiable dispersion of chromatin  
79 density patterns at the ultrastructural level corresponding to a loss of regularity in the distribution of  
80 locally dense chromatin regions (formerly called nucleosomal clutches in mammalian cells, (Ricci, Manzo  
81 et al. 2015). This correlates with an overall reduced nucleosome repeat length and altered nucleosomal  
82 occupancy which blurs the distinction between transcriptional- and epigenetic- dependent states of  
83 chromatin (Roudier, Ahmed et al. 2011, Sequeira-Mendes, Araguez et al. 2014). At the same time, H1  
84 depletion induces hyperacetylation of the chromatin, and reduction of H3 methylation (but not H3 levels  
85 itself).

86 Our study thus uncovers a function for H1 in non-heterochromatic regions, which was so far overlooked.  
87 Yet, and reminiscent to findings in mammalian cells, H1 depletion has a moderate impact on gene  
88 expression, at least in standard plant growth conditions. Thus, our analysis reinforces the idea that H1-  
89 mediated, large-scale chromatin organization is dispensable for basic cellular functions and plant  
90 growth. Nevertheless, the observation of mild, yet specific phenotypes altering flowering transition,  
91 seed dormancy relief, lateral root formation, stomatal spacing, and competence to form callus under  
92 inducing conditions suggests a role for H1 in providing robustness during developmental transitions. We  
93 propose a model where H1-mediated chromatin organization, operating at the nanoscopic and nuclear  
94 scale level, facilitates transcriptional reprogramming under developmental cues.

## 95 **Results**

### 96 **H1 variants are necessary for assembly but dispensable for silencing and peripheral positioning of** 97 **heterochromatin**

98 Reminiscent to the role of H1 in mammalian cells, Arabidopsis plant cells lacking the three canonical H1  
99 isoforms show well constituted nuclei. Yet they exhibit a larger size and fail to form the typical 6-8  
100 heterochromatic chromocenters (CC) normally seen in wild-type somatic nuclei (**Figure 1A,B**).  
101 Arabidopsis CCs are largely composed of centromeric and pericentromeric transposable element (TE)  
102 repeats and a subset of two to four CC are associated with the nucleolus and comprise rDNA repeats  
103 (Fransz, De Jong et al. 2002, Soppe, Jasencakova et al. 2002). While centromeric repeats are dispersed in  
104 *3h1* mutant nuclei, rDNA repeats localize in compact CC as in wild-type (**Figure 1C**), indicating that H1s  
105 are essential for maintaining structural, compact domains at (peri-) centromere regions but dispensable  
106 for the heterochromatinization of rDNA repeat loci. Interestingly, although lacking a canonical  
107 organization, centromeric repeats in *3h1* nuclei remain located at the periphery as described in wild  
108 type (Andrey, Kieu et al. 2010) (**Figure 1D**) suggesting that H1-mediated CC compaction occurs  
109 downstream of the spatial positioning of centromeric regions. High-resolution imaging further  
110 confirmed the presence in *3h1* nuclei of nanoscopic bodies of condensed chromatin possibly  
111 corresponding to dispersed heterochromatin regions that were not assembled into larger  
112 (chromocenter) structures (**Figure 1E**). The observation that H1s are required for CC formation is  
113 consistent with previous work showing that the Arabidopsis H1.1 variant is sufficient to induce ectopic  
114 heterochromatinization of genomic regions in tobacco (Prymakowska-Bosak, Przewloka et al. 1996).  
115 With a much shorter C-terminal tail, H1.3 shows a different chromatin-binding abilities, and a tissue-  
116 specific expression pattern distinct to that of H1.1 and H1.2 variants (Rutowicz, Puzio et al. 2015). Yet,  
117 the three Arabidopsis H1 variants can play a partially redundant function in CC organization in adult

118 tissue. This is suggested by an intermediate reduction in heterochromatin content in the double  
119 *h1.1h1.2* mutant compared to that in the triple mutant in roots (**Figure 1 – figure supplement 1**).  
120 Possibly, the ectopic expression of H1.3 in the absence of H1.1 and H1.2 may contribute to this  
121 intermediate phenotype (**Figure 1 – figure supplement 1**). In embryonic tissues (cotyledons), CC  
122 formation and heterochromatinisation of centromeric and pericentromeric repeats is, however, clearly  
123 controlled by the H1.1 and H1.2 variants (**Figure 1 – figure supplement 1C**). Despite this functional  
124 redundancy, expression of an RFP-tagged H1.1 or GFP-tagged H1.2 variant is sufficient to restore  
125 heterochromatin assembly (**Figure 1 – figure supplement 1A,B**). At the genomic level, chromocenters  
126 display distinctive chromatin signatures described as chromatin states 8 and 9 (CS 8 and 9) and  
127 specifically enriched in H3.1 variants, DNA methylation, H3K27me1 and H3K9me2 modifications  
128 (Sequeira-Mendes, Araguez et al. 2014, Vergara and Gutierrez 2017). We generated chromatin  
129 accessibility analyses based on Micrococcal Nuclease profiling (MNase-seq) showing that typical CS8 and  
130 CS9 regions have a consistent 12-15% reduction in nucleosomal density in *3h1* nuclei (**Figure 1F**). In  
131 addition, nucleosome distribution is more variable in *3h1* heterochromatin as shown by the higher  
132 frequency of both short (<150nt) and unusually long (>300nt) MNase-protected regions compared to  
133 wild-type, with an average nucleosome repeat length NRL globally shorter by 10 nt in the *3h1* mutant  
134 (**Figure 1G, Figure 1 – figure supplement 2**). Thus, H1 seems to constrain nucleosomal spacing and  
135 provide a template of regularity in nucleosome distribution along heterochromatin regions, a property  
136 of H1 that was recently shown in *Drosophila* chromatin (Baldi, Krebs et al. 2018). This, in turn, may  
137 facilitate spatial folding into larger structures (Routh, Sandin et al. 2008) and hence chromocenter  
138 assembly. Furthermore, the absence of microscopically visible chromocenters does not seem to impair  
139 the deposition of their corresponding epigenetic silencing marks which remain abundant but massively  
140 redistributed in nucleoplasm (**Figure 1H**). Aiming at testing the effect of H1 on heterochromatin control,  
141 RNA-seq data were generated for both wild-type and *3h1* plants. Consistently, the transcriptional



142 control of TEs still remains effective with only a moderate fraction of 1.5% TEs being upregulated in our  
143 RNAseq profiles (a third of them being LTR/Gypsy pericentromeric elements, **Tables S1 and S2, Figure 1**  
144 **– figure supplement 3**). Collectively, our observations indicate that H1 is critical for heterochromatin  
145 assembly into compact chromocenter foci downstream of epigenetic silencing and peripheral  
146 positioning. This may be enabled through regulating nucleosomal distribution and constraining NRL  
147 ranges. Those define the density of nucleosomal arrays that in turn influence the folding and resulting  
148 structures into higher-order level chromatin arrangements (Maeshima, Rogge et al. 2016).

149 **H1 variants enable a regular spatial distribution of nanoscale-chromatin domains and regulate**  
150 **nucleosomal density and mobility in euchromatin.**

151 As shown by genome-wide profiling, Arabidopsis H1 variants are abundant throughout the genome and,  
152 besides heterochromatin, are present in euchromatin regions (Rutowicz, Puzio et al. 2015). This is also  
153 visualized *in situ* (**Figure 2A**) showing discrete regions with enriched H1 levels interspersed with H2B  
154 (**Figure 2B, inset**). We thus hypothesized that H1 depletion may also impact the structural organization  
155 of euchromatin regions. To resolve nanoscale level-of-organization, we measured chromatin density  
156 patterns on ultrathin transmission electron microscopy (TEM) preparations (**Figure 2C**). For this we used  
157 a spatial pattern analysis approach that was previously validated to capture relevant, functional features  
158 of chromatin organization in cancerogenous animal cells (Cherkezyan, Stypula-Cyrus et al. 2014). In  
159 brief, a spatial autocorrelation function (ACF) of chromatin staining spatial distribution is calculated  
160 inside multiple regions of interests (ROIs, **Figure 2D, Figure 2 – figure supplement 1A**) within the  
161 euchromatin region of each nucleus, and is used to infer the distribution of structured signal intensities  
162 at given length scales (**Figure 2E**). Strikingly, the study unveiled that euchromatin of *3h1* nuclei harbors  
163 significantly less spatial homogeneity in nanodomain distribution, as shown by a less shallow  
164 autocorrelation fit in *3h1* (ACF, **Figure 2E**) and higher dispersion of length scales ( $D$ ) compared to wild-  
165 type (**Figure 2F**). This trend was reversed in mutants complemented by a tagged H1.1 variant (**Figure 2 –**

166 **figure supplement 1B**) and independently confirmed on super resolution microscopy images of  
167 fluorescently immunolabelled nucleosomes (**Figure 2 – figure supplement 1C**). Thus, H1 variants  
168 mediate both the organization and regularity of discrete, spatial nanodomains. At the molecular level,  
169 H1 depletion does not affect the overall qualitative distribution of nucleosomes with respect to  
170 chromatin states or metagene profiles in our MNase-seq analysis of *3h1* plants (**Figure 1 – figure**  
171 **supplement 2**). However, H1 depletion affects nucleosomal density, though in a variable manner, with  
172 regions showing higher coverage while others show no change or lower coverage. This is particularly  
173 well illustrated by nucleosome density profiles among chromatin states where the average levels  
174 relative to the CS boundaries are enhanced or, in contrast, diminished (for instance CS1, CS5 and CS4  
175 states, **Figure 2G, Figure 1 – figure supplement 2**). This suggests that H1s provide structural attributes to  
176 epigenetically distinct domains. Next, we assessed whether the relaxation of chromatin domains in *3h1*  
177 influenced global nucleosomal mobility in euchromatin, a property that is strongly correlated with  
178 transcriptional competence in plants and animals (Schwabish and Struhl 2004). Fluorescence Recovery  
179 After Photobleaching (FRAP) was performed on cells expressing an RFP-tagged H2B variant showed that  
180 nucleosomes are ~2.5 times more mobile in H1-depleted chromatin than in wild-type (**Figure 2H**).  
181 Chromatin mobility in mutant differentiated cells resembled that in wild-type meristematic (pluripotent)  
182 cells (**Figure 2 – figure supplement 2**). Consistent with this higher mobility, *3h1* nuclei show global  
183 histone hyperacetylation typical for meristematic chromatin (Rosa, Ntoukakis et al. 2014), with a 2.5-  
184 fold increase at the cytological level compared to wild-type (**Figure 2I**).

185 In conclusion, H1-depleted cells show a relaxed, hyperacetylated, highly mobile chromatin with a low  
186 degree of structural differentiation between chromatin states. Our data show that H1 variants play a  
187 significant role in euchromatin too where they modulate nucleosomal density, restrict nucleosome  
188 mobility and enable regularity at the spatial level in the distribution of higher-order, nanoscopic  
189 domains in the nucleus.

190 **H1 depletion alters epigenetic and structural signatures linked with transcriptional competence but *in***  
191 ***fine* impacts only moderately gene expression**

192 Next, we asked whether this global chromatin relaxation induced by H1 depletion would impact on the  
193 transcriptional landscape. In wild-type tissue, the nucleosomal coverage at genic regions inversely  
194 correlates with expression levels (**Figure 3A** and (Li, Liu et al. 2014)). Nucleosomal density in gene  
195 bodies, particularly (ie downstream the transcriptional start site, TSS) corresponds to a structural  
196 attribute distinguishing gene loci according to their transcriptional states. In *3h1*, we observed a notable  
197 loss of structural differentiation among these states with a generally higher nucleosomal density  
198 specifically downstream the TSS (**Figure 3A**). At the same time, though, this higher nucleosomal  
199 occupancy did not seem to impair transcription for a majority of genes since very few loci are  
200 downregulated in *3h1* plant lines (43 genes for p-value < 0.05 and fold change > 2, **Figure 3B, Table S3,**  
201 **Figure 3 – figure supplement 1**). By contrast, most of the moderate fraction of genes that are  
202 misexpressed in *3h1* are up-regulated (658 genes for p-value < 0.05 and fold change > 2, **Figure 3B,**  
203 **Table S3**). Therefore, H1 is necessary to provide distinct structural signatures to genomic regions with  
204 distinct transcriptional profiles, but does not affect transcriptional competence at a global level. Yet, H1s  
205 clearly exert a transcriptional control at a few hundreds of loci. Interestingly, down-regulated genes are  
206 largely representing light-related metabolism with an enrichment in Gene Ontology (GO) terms related  
207 to chlorophyll, photosynthesis and response to light (**Table S4**). We did not find a specific enrichment in  
208 GO terms for the group of up-regulated genes (not shown), nor a dramatic overrepresentation of  
209 specific chromatin states (**Figure 3 - figure supplement 3**). However, an interesting observation is that  
210 these genes have a notable high periodicity in nucleosome positioning within 800bp downstream the  
211 transcriptional start site (TSS, **Figure 3C**), a feature which is normally only found for a subset of (highly)  
212 expressed genes (Pass, Sornay et al. 2017), whereas this class of H1 targets are low expressed in wild-  
213 type (**Figure 3 - figure supplement 2**).

214 The impact of H1 depletion on gene expression may arise from improper nucleosome distribution in  
215 regulatory regions influencing the access of the transcription machinery and epigenetic regulators as  
216 this was shown for DNA methylation (Wierzbicki and Jerzmanowski 2005, Zemach, Kim et al. 2013, Lyons  
217 and Zilberman 2017). In addition to influence on DNA methylation, H1 depletion was also shown to  
218 correlate with drastic changes of the histone modification landscape in the context of germline  
219 precursor (Spore Mother Cells, SMC) differentiation: there, H1 eviction is a developmental marker of the  
220 somatic-to-reproductive fate transition that precedes a breadth of global chromatin changes at the  
221 structural and epigenetic levels (She, Grimanelli et al. 2013). These include heterochromatin  
222 decondensation and histone hyperacetylation as seen in *3h1* mutant somatic tissues as well as a marked  
223 elevation of H3K4me3 and decrease of H3K27me3 levels, respectively (She, Grimanelli et al. 2013),  
224 together with a transient decrease of DNA methylation in the CHH, but not the CG sequence context  
225 (Ingouff, Selles et al. 2017). We thus looked at the cytological distribution and abundance of DNA  
226 methylation and canonical chromatin modifications in *3h1* mutant nuclei (**Figure 3 and Figure 3 – figure**  
227 **supplements 4 and 5**). Cytological levels of methylated DNA in the CG and CHH context was not altered  
228 in *3h1* mutant nuclei (**Figure 3 – figure supplement 4**) which indicates that genome-wide erasure of CHH  
229 DNA methylation in SMC (Ingouff, Selles et al. 2017) is not simply a consequence of H1 depletion. In  
230 addition, H1 was shown to influence the DNA methylation landscape in a complex manner depending on  
231 other genomic and chromatin attributes (Wierzbicki and Jerzmanowski 2005, Zemach, Kim et al. 2013),  
232 which cannot be captured by cytological imaging. H3K4me3 are moderately, but reproducibly lower in  
233 *3h1* nuclei (**Figure 3D**). Thus, H3K4me maintenance in somatic tissues requires H1. A corollary to this is  
234 that chromatin decondensation is not the cause of H3K4 hypermethylation in H1-depleted SMC as  
235 initially interpreted. In addition, H1 depletion in *3h1* mutant nuclei resulted in a drastic reduction of  
236 H3K27me3 levels compared to wild-type (**Figure 3E**) that was originally measured in H1-depleted SMCs  
237 (She, Grimanelli et al. 2013), but not of H3K27me2 (**Figure 3 – figure supplement 5**). A two-fold

238 reduction of H3K27me3 was further confirmed on whole seedling chromatin extracts by immunoblotting  
239 **(Figure 3F and Figure 3 – figure supplement 6)**. Yet, only 10% of the genes upregulated in *3h1* (p-  
240 value<0.05) overlap with known H3K27me3 genomic targets, and ca 4% are shared with a PRC2  
241 compromised mutant such as *clf* (*curlyleaf*, (Wang, Liu et al. 2016)). Thus, although these proportions  
242 remain significant when compared to random representations (p-value<0.001, Fisher test) it suggests  
243 that loss of H3K27me3 is not solely responsible for gene misregulation in *3h1* seedlings. The expression  
244 of histone modifying enzymes is not significantly changed in *3h1* **(Table S5)**. This indicates that altered  
245 H3K4me3 and H3K27me3 landscapes may rather be a consequence of altered nucleosomal density, as  
246 shown before, possibly affecting the targeting, spreading of the modifications, or both.

247 Collectively, our data indicate that H1 variants provide structural attributes enabling differentiation of  
248 transcriptional domains and maintenance of histone modifications in euchromatin. Although these  
249 attributes are not essential with regards to plant growth under laboratory conditions, our analyses  
250 unveil that H1s are required for transcriptional control at several hundred loci.

### 251 **H1 reinforces the epigenetic controls of developmental and cellular transitions**

252 *3h1* mutant plants resume a functional organism suggesting that H1-mediated chromatin organization is  
253 dispensable for the basic functioning of the plant genome in laboratory growth conditions. However, we  
254 observed several subtle but quantifiable deviations from the otherwise highly regular developmental  
255 pattern observed in the wild type. Particularly, *3h1* plants were affected at key developmental  
256 transitions of the plant's life cycle such as seed dormancy breaking and flowering **(Figure 4A,B)** as well as  
257 during cellular transitions in root and shoot tissues responsible for the establishment of lateral roots,  
258 root hairs and leaf stomata **(Figure 4C-F)**. More specifically, *3h1* seeds showed a prolonged seed  
259 dormancy **(Figure 4A)** where the expression of H1.1 was sufficient to restore a wild-type trait. Following  
260 germination, mutant plants grew regularly but flowered significantly earlier **(Figure 4B)**, a rescuable  
261 phenotype mostly attributed to H1.1 and H1.2 variants **(Figure 4 – figure supplement 1)**.

262 Besides these major developmental transitions changing the plant's lifestyle, several cellular transitions  
263 occur that establish tissues and cell types that are not predefined in the primary root or shoot organs,  
264 hence are not a meristem-derived lineage. In Arabidopsis, the specification of lateral root primordia  
265 from pericycle founder cells and the differentiation of root hairs from epidermal cells follow a regular  
266 pattern modulated by developmental and environmental cues (Van Norman, Xuan et al. 2013, Salazar-  
267 Henao, Velez-Bermudez et al. 2016). Compared to wild-type, *3h1* seedlings produced more lateral roots  
268 per root length unit (**Figure 4C, Figure 4 – figure supplement 2**), more root hair cells (**Figure 4D, Figure 4**  
269 **– figure supplement 2**). Both phenotypes were reversed upon restored expression of H1.1 and H1.2,  
270 possibly indicating more frequent developmental initiation events. In addition, the unicellularity of root  
271 hairs was occasionally compromised in *3h1* with the appearance of multiple nuclei and cell boundaries  
272 (**Figure 4E, Figure 4 – figure supplement 2**). Similarly, stomata patterning was altered in *3h1* mutant leaf  
273 epidermis with a higher occurrence of high-degree (tertiary and quaternary) clusters, associated with  
274 complex arrangements, collated stomata or atypical division patterns in early stages that were not  
275 found in the wild type (**Figure 4F, Figure 4 – figure supplement 2**). These observations suggest a loose  
276 control of stomatal spacing presumably involving occasional re-initiation events (Lau and Bergmann  
277 2012). Finally, we also tested how *3h1* tissues respond to reprogramming in *in vitro* culture and indeed  
278 measured a decreased efficiency in callus development compared to the wild-type (**Figure 4G**), a feature  
279 mostly attributed here to H1.3 (**Figure 4F, Figure 4 – figure supplement 3**). Interestingly, all these  
280 phenotypes point out to processes regulated by PRC2 complexes as demonstrated by genetic analyses  
281 or inferred from PRC2-mediated enrichment of H3K27me3 at regulatory loci controlling these transitions  
282 (Wood, Robertson et al. 2006, Bouyer, Roudier et al. 2011, He, Chen et al. 2012, Gu, Xu et al. 2014, Lee,  
283 Lucas et al. 2014, Molitor, Bu et al. 2014, Zhu, Rosa et al. 2015). Not all three H1 variants are  
284 equivalently involved in these processes, with H1.1 and H1.2 largely contributing to flowering, lateral  
285 roots and dormancy while H1.3 may be solely responsible for callus competence. Although relative

286 levels of H1.1 and H1.2 variants change along the meristematic-elongation-differentiation transition in  
287 roots (with an increasing H1.2/H1.1 ratio, (**Figure 4F, Figure 4 – figure supplement 4**) the moderate but  
288 specific phenotypic alterations in *3h1* mutant plants suggest a relaxation of some of the mechanisms  
289 controlling cellular transitions, possibly as a consequence of the singular chromatin organization in this  
290 mutant.

## 291 **Discussion**

292 H1 linker histones are core components of chromatin organization in eukaryotes. Thanks to a tripartite  
293 structure, H1s bind the DNA at entry/exit sites and tether neighboring octamers through electrostatic  
294 interactions with positively charged, flexible tails. As a result, H1s spatially accommodate a string of  
295 nucleosomal particles in an ordered, spatial arrangement of a compaction level varying depending on H1  
296 subtypes. Formerly proposed to achieve the folding of chromatin fibers into a large-scale, 30nm  
297 diameter solenoid, H1s are now understood to foster the formation of local nucleosomal arrays (also  
298 called ‘nucleosome clutches’ or ‘nucleosome clusters’) of varying size and density along the genome and  
299 depending on cell type (Ricci, Manzo et al. 2015) as shown in animal models. Reduction of H1 levels in  
300 mammalian cell lines generate cytological and molecular alterations of chromatin organization with  
301 heterochromatin reorganization, nuclear swelling, loss of sharp boundaries between topological  
302 domains, reduction of the average nucleosomal length repeat and loss of periodicity in nucleosomal  
303 array organization, alteration of the level and distribution patterns in histone modifications and DNA  
304 methylation (Fan, Nikitina et al. 2005, Cao, Lailler et al. 2013, Geeven, Zhu et al. 2015, Baldi, Krebs et al.  
305 2018, Fyodorov, Zhou et al. 2018). Flowering plants and animals diverged more than 1500 MY ago and  
306 H1 protein sequence have substantially evolved in the different kingdoms, while their tripartite  
307 constitution remained preserved (Kasinsky, Lewis et al. 2001, Jerzmanowski 2007, Kotlinski, Knizewski et  
308 al. 2017). Functional similarities between plant and animal H1’s was shown for a few features, including

309 the property to induce heterochromatin formation *in vivo* (Prymakowska-Bosak, Przewloka et al. 1996)  
310 and influence the DNA methylation landscape (Wierzbicki and Jerzmanowski 2005, Rea, Zheng et al.  
311 2012, Zemach, Kim et al. 2013). Yet so far, a detailed analysis of H1 roles on chromatin organization in  
312 plants was missing. Here, we show that Arabidopsis variants collectively contribute to the fine-scale  
313 (nucleosome distribution, nanoscopic domains) and nuclear-scale (microscopic domains, global  
314 properties) levels of chromatin organization, with notably distinctive functions in eu- and hetero-  
315 chromatin.

316

317 Our cytological and expression analysis shows that for heterochromatin, H1 seems to act downstream  
318 the processes securing epigenetic silencing at TEs, notably repressive DNA methylation and H3K9  
319 methylation, and peripheral positioning. TE close to genes, and located mostly along chromosome arms,  
320 require the RNA-dependent DNA Methylation (RdDM) machinery involving small RNAs for initial DNA  
321 methylation targeting; silencing maintenance is then reinforced by H3K9 methylation and DNA  
322 methylation maintenance enzyme (reviewed in (Sigman and Slotkin 2016)). By contrast, DNA  
323 methylation of pericentromeric TEs is independent of RdDM but requires CMT2, a specific DNA  
324 methyltransferase and the chromatin remodeler DECREASE in DNA METHYLATION1, DDM1 (Zemach,  
325 Kim et al. 2013). At pericentromeric TE loci, H1 is thought to modulate (but not hinder) DNA methylation  
326 in the CHG context by reducing access to CMT2, a configuration resolved by DDM1 (Zemach, Kim et al.  
327 2013). Interestingly, despite a globally stable TE expression landscape in *3h1*, a small fraction (1.5%) of  
328 TEs, which are mostly pericentromeric (enriched in LINE, Gypsy and Copia elements) is derepressed  
329 upon H1 depletion. Thus, this subset of TE might reveal a dual role for H1 in possibly a cooperative role  
330 here (instead of hindrance) with CMT2 for establishing a repressive DNA methylation profile.  
331 Alternatively for this subset of TEs, H1 act in a distinct manner together with CMT3 with which it was  
332 shown to interact (Du, Zhong et al. 2012). In mammalian stem cells, H1 depletion leads to the



333 derepression of major, pericentromeric satellite repeats (but not of the centric, minor satellite repeats)  
334 independently of common epigenetic silencing marks (Cao, Lailier et al. 2013). In *Drosophila*, however,  
335 H1 depletion also releases silencing of pericentromeric TEs but in an H3K9me2-dependant manner (Lu,  
336 Wontakal et al. 2013, Iwasaki, Murano et al. 2016). Thus, while the situation in *Arabidopsis* seems closer  
337 to that described in mammalian cells, *Arabidopsis* H1 may share a dual role in in modulating either  
338 negatively or positively pericentromeric repeats silencing.

339

340 At the nuclear level, we show here that H1 variants are necessary to assemble marked, silent and  
341 positioned heterochromatic regions into compact, microscopic structures known as chromocenters  
342 (Figure 5). On the other hand, in *Drosophila*, particularly in salivary gland cells H1 is responsible for  
343 pericentromeric heterochromatin assembly (Lu, Wontakal et al. 2009), but this might be considered as a  
344 singular situation due to polytenic chromosomes. It thus remains that animal and plant H1 subtypes may  
345 differ in their function regarding chromocenter assembly and spatial arrangement in interphase nuclei.  
346 In addition and interestingly, genomic repeats of the NOR are not affected by the loss of H1 variants in  
347 *Arabidopsis* nuclei indicating the existence of an H1-independent control of these heterochromatic  
348 structures. Which factors, possibly among GH1-containing proteins (Kotlinski, Knizewski et al. 2017),  
349 mediate the compaction of NOR in H1 depleted cells remains to be determined.

350

351 In euchromatin, the spatial distribution of chromatin density patterns becomes heterogeneous in H1-  
352 depleted chromatin compared to wild-type nuclei. Autocorrelation analyses showed that *3h1* chromatin  
353 is a more heterogeneous material composed of irregularly dispersed, nanoscale patches of variable  
354 densities as opposed to wild-type. This spatial dispersion is accompanied by an altered distribution of  
355 key histone 3 methylation marks which raises a question of causality between these two phenotypes  
356 (Figure 5). Nucleosomal arrays can be formed in the absence of H1 yet with less regularity, forming

357 “ladders” or “puddles” type of arrangements (Beshnova, Cherstvy et al. 2014). The increased spatial  
358 dispersion of compact nanoscopic chromatin domains as observed in TEM in *3h1* nuclei is highly  
359 reminiscent of euchromatin distribution in tumorigenic nuclei losing fractal property of organization  
360 (Cherkezyan, Stypula-Cyrus et al. 2014). These specific disturbance in spatial chromatin organization  
361 have been correlated with transcriptional heterogeneity which are explained by the paired effect of  
362 increased accessibility and increased local compaction (Almassalha, Tiwari et al. 2017) similarly to the  
363 situation in *3h1*. Our observations are also consistent with reports that lower levels of H1 in pluripotent  
364 mammalian cells are responsible for changes in spatial chromatin distribution patterns with higher  
365 dispersion of nucleosome clutches with of smaller size, increasing PolIII accessibility and favoring its  
366 redistribution (Ricci, Manzo et al. 2015).

367

368 At the molecular level, H1 influences both nucleosomal spacing and abundance with, however, distinct  
369 and sometimes antagonistic consequences depending on chromatin states. Notably, nucleosomal  
370 coverage is smaller in H1-depleted chromatin relative to wild-type in states typical for no or poor  
371 transcriptional activity (intergenic regions, heterochromatin regions). Yet this change in nucleosomal  
372 distribution does not correlate with a global derepression of the corresponding genic regions reinforcing  
373 the idea that H1 acts downstream of processes maintaining a durable epigenetic silencing (as opposed  
374 to other, variably expressed loci) in *Arabidopsis*. By contrast to transcriptionally silent regions, H1  
375 depletion induced an increased level of nucleosomes at chromatin states/cis genomic elements  
376 normally associated with transcriptional competence without compromising transcription for a vast  
377 majority of loci (Figure 5). However, a few hundred loci are more directly influenced by H1 and linker  
378 histone depletion result in their upregulation concomitantly to a 1.2-fold nucleosome enrichment in  
379 their gene body- but not upstream regions- (Figure 5). These observations challenge an intuitive

380 expectation coming from reports that nucleosome occupancy is usually inversely correlated to gene  
381 expression level (Li, Liu et al. 2014).

382

383 It indicates instead, that, at least in the absence of H1, a higher density of nucleosomes does not hinder  
384 transcriptional processes *per se*. Increased nucleosome mobility associated with higher histone  
385 acetylation in the absence of H1 might provide a functional chromatin template for transcriptional  
386 processes to be operated normally throughout the genome, except at a few hundred loci that seem H1-  
387 dependent. Upregulation in *3h1* is notably affecting genes that are normally very low or not expressed.  
388 Thus, this observation suggests two classes of repressed genes, those where H1-mediated chromatin  
389 organization is epistatic to transcriptional repression and those where H1 acts downstream the  
390 regulatory processes. This proposed explanation should be, however, pondered by the possibility that  
391 upregulation occurs only in a few cells, which chromatin profile is not captured in bulk tissue profiling.  
392 Nevertheless, our observations are reminiscent of the moderate, but not null, impact of H1 depletion in  
393 gene expression in animal cells (Shen and Gorovsky 1996, Hellauer, Sirard et al. 2001, Fan, Nikitina et al.  
394 2005, Sancho, Diani et al. 2008) suggesting as well the existence of both H1-dependent and independent  
395 transcriptional control (**Figure 5**).

396

397 We further show that H1 depletion in Arabidopsis alters nucleosomal spacing but in a distinct manner  
398 from that in animal cells: besides a shift of NRL distribution peak from 170-180 to 160-170bp which is  
399 similar to the situation in animals (Fan, Nikitina et al. 2005), *3h1* chromatin shows a higher  
400 representation of both long (>200bp) and short NRLs (<160bp). This indicates a more permissive  
401 environment enabling diverse configuration of nucleosome spacing normally rare in the presence of H1  
402 (Beshnova, Cherstvy et al. 2014). This possibly reflects the sterical influence of H1 imposing a defined  
403 range of nucleosome clustering, in turn influencing chromatin fiber folding and compaction (Routh,

404 Sandin et al. 2008, Correll, Schubert et al. 2012). NRL variation is recognized to contribute chromatin  
405 fiber polymorphisms (reviewed in (Boule, Mozziconacci et al. 2015)). Long NRL can be composed of  
406 closely associated nucleosomes, but also of “stretched nucleosomes” formed in the absence of H1 and  
407 where DNA-histone contacts are lost (Usachenko, Gavin et al. 1996)). These molecular scenarios do not  
408 exclude the possibility that alternative chromatin architects such as HMG proteins (Jerzmanowski,  
409 Przewłoka et al. 2000, Postnikov and Bustin 2016) or H1-related proteins (Kotlinski, Knizewski et al.  
410 2017) contribute to regulate nucleosome distribution and shape chromatin domains in *3h1* nuclei.  
411 The consequences of H1 depletion at microscopic and ultrastructural level of chromatin organization in  
412 *Arabidopsis* is reminiscent of the pluripotent chromatin state in mammalian cells (Boskovic, Eid et al.  
413 2014, Ricci, Manzo et al. 2015) but also of that of the *Arabidopsis* SMCs which are functional equivalent  
414 of the animal primordial germ cells. Indeed, H1 variants in *Arabidopsis* are actively depleted in both  
415 male and female SMC that undergo the somatic-to-reproductive cell fate transition. H1 eviction occurs  
416 at the onset of the meiotic S-phase and precedes nuclear enlargement, reduction in heterochromatin  
417 content (without affecting the level of the typical TE silencing H3K9me2 mark) along with drastic  
418 changes in the level and distribution of histone modifications in euchromatin with respect to canonical  
419 permissive and repressive histone marks (She, Grimanelli et al. 2013, She and Baroux 2015). Notably, H1  
420 depletion in SMC was followed by an increase in H3K4 methylation and H4 acetylation. We observed  
421 here a corresponding hyperacetylation in *3h1* mutant cells similar to the one reported in SMC. This  
422 similarity is consistent with the known function of H1 in repressing core histone acetylation, likely by  
423 masking the target histone tail residues (Herrera, West et al. 2000). By contrast, opposite to what we  
424 observed in H1-depleted SMC, global levels of H3K4me3 are decreased in *3h1* mutant cells. Mammalian  
425 cells with reduced H1 levels showed a global increase of H3K4 methylation (Wang, Paucek et al. 2017)  
426 although a few loci showed lower levels (Geeven, Zhu et al. 2015). In H1 depleted SMC cells,  
427 increased H3K4 methylation is requiring the SET-domain H3K4 methyltransferase SDG2 (She, Grimanelli

428 et al. 2013). But here, expression of most HMT-encoding genes are unaffected in the *3h1* mutant  
429 suggesting that H3K4me3 depletion is a primary effect of altered chromatin organization. Furthermore,  
430 developmentally-regulated depletion of H1 in SMC also had a considerable effect on H3K27me3 levels,  
431 similar to the drastic reduction we observe in the *3h1* mutant and to what was formerly reported in H1-  
432 depleted animal cells on pluripotency genes (Zhang, Cooke et al. 2012). Thus, most likely the  
433 dependence of the PRC2 complex towards H1-containing oligonucleosomes for propagating H3K27  
434 methylation described in mammalian cells is conserved in plants (Martin, Cao et al. 2006). Despite a  
435 significant enrichment of *3h1* –misregulated genes in H3K27me3 targets, expression of only a fraction of  
436 the PRC2-regulated loci (profiled in (Wang, Liu et al. 2016)) are affected by H1 depletion indicating that  
437 at least in Arabidopsis, there are alternatives to H1-mediated chromatin structures for PRC2 activity.  
438 Conversely, ectopic transcription, enabled at H1-depleted loci, may also provide a mechanism for PRC2  
439 inhibition as suggested previously (Wang, Paucek et al. 2017).

440

441 Collectively, our data show that chromatin dynamics in plant and animal cells share common organizing  
442 principles in fine-scale and nuclear-scale level of chromatin organization orchestrated by linker histone  
443 variants, and in the influence of H1 on the epigenetic landscape notably in euchromatin. Given an early  
444 origin of H1-related histones and PRC2 components (Kasinsky, Lewis et al. 2001, Shaver, Casas-Mollano  
445 et al. 2010), the functional relationships between H1-mediated chromatin structure and PRC2 activity  
446 possibly predate the dichotomy between plant and animal kingdoms. The evolutionary conservation of  
447 H1 function as architect and epigenetic modulator is however in stark contrast with their apparent  
448 dispensability, as many organisms tolerate H1 depletion (Izzo and Schneider 2016). H1 depletion has a  
449 moderate impact on gene expression at a global scale in Tetrahymena, yeast, vertebrates (reviewed in  
450 (Izzo and Schneider 2016)) and plants (this study) suggesting that H1 is not epistatic over basic molecular  
451 controls of transcription, at least for a large fraction of the genome. Nonetheless, in both plant (this

452 study) and animal (Lu, Wontakal et al. 2013, Geeven, Zhu et al. 2015) cells, several hundred loci are  
453 misregulated upon H1 depletion including a large fraction of upregulated genes which transcriptional  
454 repression is thus normally H1-dependent.

455

456 The observation that H1 depletion in mammalian stem cells affect pluripotency genes (Zhang, Cooke et  
457 al. 2012), that H1 variants are evicted in a developmentally-regulated manner in primordial germ cells  
458 prior to pluripotency establishment in mouse (Hajkova, Ancelin et al. 2008) but also in plants in the  
459 precursors of the male and female reproductive lineage (She, Grimanelli et al. 2013, She and Baroux  
460 2015), and that H1 incorporation is reduced in pluripotent mammalian cells (Ricci et al 2015) suggest a  
461 role for H1 in establishing a chromatin environment favorable to epigenetic and transcriptional  
462 reprogramming. The subtle yet specific phenotypes of *3h1* in the flowering and dormancy transitions, in  
463 the control of lateral root formation, root hair and stomatal fates, in *in vitro*-induced tissue  
464 reprogramming (callus) fuel the hypothesis that H1-mediated chromatin organization may facilitate  
465 epigenetic reorientation during cellular transitions. Consistent with this concept, H1-depleted nuclei  
466 show chromatin organization and properties to some extent reminiscent of an “immature” state of  
467 chromatin organization typical of pluripotent plant cells and/or meristematic tissues (She, Grimanelli et  
468 al. 2013) (Tessadori et al, 2010, Costa et al 2014) and pluripotent cells in animals (Boskovic, Eid et al.  
469 2014, Ricci, Manzo et al. 2015). These consideration prompts for further investigations aiming at testing  
470 the specific role of H1 in gene expression robustness *versus* variability (Cortijo, Aydin et al. 2018),  
471 especially during environmental challenge frequent in natural condition. Furthermore, the connection  
472 between spatial dispersion in chromatin patterns distribution and transcriptional heterogeneities in H1-  
473 depleted plant cells echoes with recent models in mammalian cells implicating higher-order folding  
474 chromatin topology as an independent route influencing transcriptional dynamics (Almassalha, Tiwari et  
475 al. 2017). These evidence strongly motivate further exploration of fine-scale, spatial chromatin dynamics

476 complementary to molecular-level, epigenetic studies of plant developmental and environmental  
477 response processes.

## 478 **Materials and Methods**

### 479 **Plant materials and growth conditions**

480 The *Arabidopsis thaliana* plants used in all experiments were in the Col-0 background unless it is  
481 specified otherwise. The *h1.1h1.2h1.3* (*3h1*) mutant was described before (She, Grimanelli et al. 2013)  
482 and it showed no detectable levels of H1 in Western Blot and immunostaining experiments (She,  
483 Grimanelli et al. 2013), ([www.agrisera.com/en/artiklar/h1-histone-h1.html](http://www.agrisera.com/en/artiklar/h1-histone-h1.html)). Complemented mutant  
484 lines were generated by transforming *3h1* via floral dip method (Clough and Bent 1998) with H1 tagged  
485 variants (prom.H1.1::H1.1-RFP, prom.H1.2::H1.1-(G/C)FP, prom.H1.3::H1.3-GFP) described previously  
486 (She, Grimanelli et al. 2013, Rutowicz, Puzio et al. 2015). The *3h1* was complemented with either two  
487 main (H1.1, H1.2) or all three H1 variants to generate the following lines: *3h1-comp*<sup>1,2</sup>=  
488 *h1.1h1.2h1.3;H1.1-RFP;H1.2-GFP* (line #KR276), *3h1-comp*<sup>1,2,3</sup> = *h1.1h1.2h1.3;prom.H1.1::H1.1-*  
489 *RFP;prom.H1.2::H1.2-CFP;prom.H1.3::H1.3-GFP* (lines #KR264 and #KR265). For FRAP experiments the  
490 UBQ10::H2B-RFP (Lucas, Kenobi et al. 2013) was crossed with *3h1* and in the subsequent generations by  
491 genotyping the *3h1/UBQ10::H2B-RFP* and WT segregants were identified.

492 Seeds were surface sterilized and rinsed in sterile water before transfer onto germination medium (0.5 x  
493 MS medium, 0.8% agar). They were placed on the medium using toothpicks to ensure uniform  
494 distribution, stratified 2-4 days at 4°C, and transferred into a plant growth incubator (Percival, Germany)  
495 with long-day photoperiod (16 h, 22 °C day/8 h, 18 °C night) and light flux around 120  $\mu\text{M}\cdot\text{s}^{-1}\cdot\text{m}^{-2}$  for  
496 routine experiments. Growth of calli and scoring of lateral root production was testing under continuous  
497 light (light flux around 100  $\mu\text{M}\cdot\text{s}^{-1}\cdot\text{m}^{-2}$ , Aralab FitoClima 1200). When the flowering stage was

498 necessary, the 10 days-old seedlings were transferred into the soil and grown at 19-21°C with a 16h  
499 day/8h night photoperiod.

#### 500 **Chromatin analyses and immunostaining**

501 Nuclei area, heterochromatin (RHF, CCs) and immunostaining analyses were carried out essentially as  
502 described (Pavlova, Tessadori et al. 2010) with minor modifications. Nuclei were isolated from rosette  
503 leaves of 3-4 weeks old seedlings; per extraction 5 leaves were fixed during 20 min under vacuum in a  
504 fresh 4% formaldehyde solution prior to isolation and resuspension of nuclei in a final volume of 1 mL  
505 Nuclei Isolation Buffer (NIB). DAPI was added at a concentration of 0.1 mg/ml for flow-sorting according  
506 to DNA content. Diploid (2C) nuclei have been flow-sorted using a BD FACSAria IIIu flow cytometer with  
507 a 450/50 nm filter (405 nm laser), equipped with a 100- $\mu$ m nozzle and 25 Psi pressure. Nuclei were  
508 collected in 200  $\mu$ l of NIB before spreading on Superfrost plus slides (1000 nuclei per slide) and stored at  
509 4°C until use. Mutant and wild-type plants were grown and processed for nuclei isolation and  
510 immunostaining in parallel.

511 For heterochromatin analysis, slides were rinsed in SSC2X then PBS before staining with DAPI 1  $\mu$ g/ml in  
512 Vectashield (Vector Laboratory). For immunostaining, the protocol essentially followed previously  
513 described steps (Pavlova, Tessadori et al. 2010). As primary antibodies, rabbit anti-Histone H3 (Abcam;  
514 ab1791), anti-Histone H1 (Agrisera; as111801), anti-H3K27me3 (Active Motif; 39155), anti-H3K27me1  
515 (Abcam; ab113671), anti-H3K4me3 (Abcam; ab8580), anti-H3K9ac (Abcam; ab10812) and anti-H3K9me1  
516 (Abcam8896) were used at a dilution of 1:200 and incubated at 37°C for 1 h. As secondary antibody,  
517 Alexa Fluor 488-conjugated goat anti-rabbit IgG (Molecular Probes; A-11008) was used at a dilution of  
518 1:1000 and incubated for 2 h at 37°C. Nuclei were counterstained for DNA with Propidium Iodide (PI).

519 16-bit images were acquired using a Leica TCS SP5 Confocal Laser Scanning Microscope (CLSM ) (Leica  
520 microsystems, GmbH, Germany) using a 63 $\times$  GLY lens (NA 1.4) for heterochromatin and immunostaining



521 analyses. Exposure times, illumination intensities, zoom factor, scanning speed and pinhole were kept  
522 identical for the image series in an experiment. For RHF measurements, signal intensities were recorded  
523 in manually drawn ROIs capturing chromocenters and normalized over the whole nucleus intensity using  
524 Fiji (Schindelin, Arganda-Carreras et al. 2012). For immunostaining, signal intensities for antibodies were  
525 normalized against (PI) levels. Graphs were plotted in excel and the data were statistically assessed  
526 using a student t-test (unpaired, unequal variance) for comparing wild-type and mutant samples.

### 527 **Fluorescent In Situ Hybridization (FISH) and 3D image processing**

528 *FISH analysis of leaf nuclei.* Nuclei were isolated from leaves of 35 days old rosettes grown under a  
529 16h/8h photoperiod. Nuclei extraction and embedding in acrylamide gel pads on slide was done as  
530 described (Ashenafi and Baroux 2018). Centromeric and 45S rDNA repeats were detected by FISH using  
531 pAL1 and pTA9 to generate DNA probes, respectively (Fransz, De Jong et al. 2002). FISH was done as  
532 described (Ashenafi and Baroux 2018) with the following labelling kits and fluorescent immunolabeling  
533 reagents: DIG-Nick (Sigma Aldrich, 11745816910 ), mouse IgG anti-DIG (1:250, Sigma Aldrich,  
534 11333062910), goat IgG anti-mouse IgG~Alexa 488 (1:200, Life Technologies, A-11001); Biotin-Nick  
535 translation kit (Sigma Aldrich,11745824910), Biotinylated Anti-Avidin D (1:250, Vector Labs, BA-0300)  
536 and Texas Red Avidin D (1:1000, Vector Labs, A-2006). Nuclei were counterstained for DNA with DAPI in  
537 Vectashield (Vector Laboratory). FISH signals in 3D nuclei were imaged using STimulated Emission  
538 Depletion (STED) microscopy (Leica SP8R WL 3xSTED, Leica microsystems, Germany).

539 *FISH analysis of cotyledon nuclei.* Nuclei were isolated from dissected cotyledons of 5-day-old seedlings  
540 grown under a 16h/8h photoperiod. Nuclei extraction, fixation and hybridization with pAL1-derived and  
541 F28D6-derived (180bp-repeats) probes (Fransz, De Jong et al. 2002) was performed as previously  
542 described (Bourbousse, Mestiri et al. 2015). Slides were washed and mounted in Vectashield with 2  
543  $\mu\text{g}/\mu\text{L}$  DAPI and image acquisition was performed as in (Bourbousse, Mestiri et al. 2015).

544 **Nuclei isolation for MNase-seq**

545 Nuclei were isolated from 3 week old seedlings frozen in liquid nitrogen as previously described  
546 (Chodavarapu, Feng et al. 2010) with following modifications: after resuspending in HBB, nuclei were  
547 applied to layer of HBB with 40% percoll (GE Healthcare), centrifuged at 1000g, 6 min, resuspended in  
548 HBB, applied to 40/75% percoll gradient, centrifuged at 400g, 40 min, collected and washed three times  
549 with HBC. The integrity of extracted nuclei was monitored using DAPI staining and fluorescence  
550 microscopy. The quantity of nuclei was measured by qPCR with primers targeting nuclear DNA.

551 Digestion was performed by incubating nuclei suspended in DB buffer (16 mM Tris-HCl pH=7.6, 50 mM  
552 NaCl, 2.5 mM CaCl<sub>2</sub>, 0.01 mM PMSF, 1x Complete EDTA-free Protease Inhibitors (Roche)) with 1.5 µl  
553 (final concentration - 0.3 U/µl) of micrococcal nuclease (Thermo Fisher) and 2 µl (final concentration -  
554 0.2 U/µl) of RNase A (Thermo Fisher) at 8°C for 90 min with gentle mixing. The reaction was stopped by  
555 adding equal volume of 2x Lysis buffer with EDTA (100 mM Tris-HCl pH=8, 200 mM NaCl, 50 mM EDTA,  
556 1% SDS). The samples were lysed by incubation in 37°C for 60 min with shaking (1000 rpm). DNA was  
557 purified using phenol-chloroform extraction, precipitated with isopropanol and sodium acetate and  
558 resuspended in water.

559 DNA was size selected by electrophoresis on 2% agarose gel with 1xTAE buffer with SYBR Gold  
560 (Invitrogen) stain. Mononucleosomal band was excised, frozen and squeezed by three cycles of spinning  
561 and rehydration on centrifuge column. DNA was purified and concentrated using Agencourt AMPure XP  
562 beads (Beckman Coulter). Barcoded libraries were synthesized from 100 ng of mononucleosomal DNA  
563 using Ion Xpress™ Plus gDNA Fragment Library Preparation Kit and Ion Xpress™ Barcode Adapters. DNA  
564 was end repaired prior to adapter ligation and size selection and amplification steps were omitted.  
565 Resulting libraries were quantified with Ion Library Quantitation Kit, pooled and used to prepare  
566 template by clonal PCR with Ion PI™ Template OT2 200 Kit v3 on Ion OneTouch™ 2 System. Sequencing

567 was performed on Ion PI™ chip v2 and Ion Proton™ sequencer using Ion PI™ Sequencing 200 Kit v2 (all  
568 Ion Torrent kits and software are trademarks of Thermo Fisher).

### 569 **FRAP imaging and data analyses**

570 A *promUBQ10::H2B-RFP* marker (Maizel, von Wangenheim et al. 2011) was introgressed in *3h1* mutant  
571 plants by crossing. Both wild-type and triple mutant segregants were analysed. Measurements were  
572 done on root tips of two weeks-old seedlings grown as previously described. One sample was prepared  
573 at a time: the root was excised and delicately mounted (i.e. without squashing) in 0.5 x MS between  
574 slide and coverslip (precleaned with EtOH), sealed with transparent nail polish and let 10 min to  
575 equilibrate upside down on the microscope platform before measurements. The imaging chamber was  
576 set at a constant temperature of 20°C (higher/fluctuating temperatures induce nuclei juggling).  
577 Bleaching and imaging was done using an APO PL 40x oil immersion objective, NA 1.3, over single plane  
578 capturing an optical section of ~2µm encompassing a single nucleus (pinhole opening to 5AU) with a  
579 256x256 pixels image format, 3-fold zoom factor. Bleaching was performed in euchromatin within ROI of  
580 1 µm diameter using 5 or more pulses until near total bleach was obtained (Argon laser at 80% power,  
581 100% transmission in 488nm) and post-bleach images were recorded using with 5-7% laser transmission  
582 for excitation, in a series of 10 time points, 1 sec interval, followed by 10 time points, 60 sec interval. For  
583 analyzing fluorescence recovery, images were first corrected for nuclear drifts occurring during  
584 acquisition, using a rigid registration approach in Fiji ((Schindelin, Arganda-Carreras et al. 2012),  
585 plugin/registration/stack reg/rigid transformation). When a single image captured several nuclei, single  
586 nuclei were cropped for registration and analysis. Fluorescence measurements were done on the bleach  
587 ROI, a control ROI near and outside the nucleus, and over the whole nucleus. Calculation of fluorescence  
588 recovery was done as described in (Phair, Gorski et al. 2004, Rosa, Ntoukakis et al. 2014) whereby the  
589 initial intensity was normalized at 1 for each image before average calculation.

590 **TEM sample preparation, imaging and image analysis**

591 70 nm tissue sections were prepared from 2 weeks old seedling roots, using a high-pressure  
592 freezing/freeze substitution and uranyl acetate staining approach as described in details previously  
593 (Fabrice T, Cherkezeyan et al. 2017). Sections from the elongation zone were selected for the analysis  
594 (i.e. meristematic zone was avoided) and nuclei pictures were consistently recorded from the epidermal  
595 layer at the 24'500 fold magnification yielding a resolution of 1 pixel=2 nm in our setup. For the analysis,  
596 square regions of interests (ROI) of similar size (ca 800x800 +/-200 pixels) were captured in euchromatin  
597 regions (i.e. excluding strongly staining chromocenters) for the analysis. Spatial autocorrelation analysis  
598 delivers a mathematical model of chromatin density distribution for each ROI with respect to the  
599 physical length scales within which signal patterns (i.e. local objects of similar intensities) are repeated  
600 in a regular pattern (periodicity) (Cherkezeyan, Stypula-Cyrus et al. 2014). We used a user-friendly  
601 graphical interface developed in Matlab for batch processing of multiple ROIs available at  
602 [www.github.org\barouxlab\ChromDensityNano](http://www.github.org/barouxlab/ChromDensityNano) and described in details previously (Fabrice T,  
603 Cherkezeyan et al. 2017).

604 **Analysis of developmental transitions**

605 *Flowering time.* Plants for flowering experiments were grown in the greenhouse or growth chamber  
606 under the long day light regime. To avoid positional effect, different genotypes were always randomly  
607 arranged over growth area. The number of rosette leaves was counted when the inflorescence was  
608 about 0.5 cm long.

609 *Root length and lateral root scoring.* Seedlings were grown vertically on square petri dishes under  
610 continuous light regime. The plates were scanned 8 days after germination to score for the number of  
611 lateral roots. Root (main and lateral) lengths were scored using manual vector tracing in Fiji, reported at  
612 scale (Schindelin, Arganda-Carreras et al. 2012). For microscopic observations of lateral root primordia,

613 five days old seedlings grown under continuous light were fixed in 70% ethanol, rinsed once in sterile  
614 water and mounted in water on microscope slides (5 roots aligned/slide covered with 40x22mm  
615 coverglass). Primordia were scored according to published developmental scale (Malamy and Benfey  
616 1997). Graphs were plotted in R.

617 *Stomata patterning*. Fresh epidermal peels of 14 days old cotyledons were mounted in water. Images of  
618 the adaxial surface were recorded with DIC microscopy and stomatal clusters were scored following as  
619 described (Kutter, Schob et al. 2007).

620 *Seed dormancy*. The experiment was designed as described previously (Nakabayashi, Bartsch et al. 2012)  
621 with minor modifications. Plants were grown in a growth chamber under long day light regime (at least  
622 three plants for each genotype) with controlled humidity. Freshly harvested seeds were stored under  
623 constant conditions. Around 180 seeds, collected from single plants, were placed on wet filter paper in a  
624 Petri dish and incubated in the growth incubator at 22°C under long day light regime. After three days  
625 the number of emerging radicles was counted. For the time point "day 1", seeds one day after  
626 harvesting were used. For the time point "3 weeks", seeds from the same batch were used three weeks  
627 after harvesting.

628 *Callus induction*. Cotyledons from 7 days-old seedlings grown under a 16h/8h photoperiod were excised,  
629 transferred onto callus induction medium (CIM, Gamborg B5, 0.05% MES, 2% Glucose, 0.1 mg/L kinetin,  
630 0.5 mg/L 2,4-D) and let to develop for 5 weeks under a 16h/8h photoperiod. Callus size (area) was  
631 determined from images using manually drawn contours in Fiji (Schindelin, Arganda-Carreras et al.  
632 2012). Graphs were plotted in R.

### 633 **Immunoblot Analyses**

634 Seeds were surface sterilized in 70% ethanol 0.05% SDS for 3 min and rinsed into 90% ethanol before  
635 drying and plating on MS medium supplemented with 0.5% sucrose and 0.9% agar. Eight-day-old

636 seedlings were used for chromatin extraction protocol as described previously (Bowler, Benvenuto et al.  
637 2004). Forty micrograms of protein samples, as estimated by the bicinchoninic acid method, were  
638 loaded on 14% LiDs Tris-Tricine gels and blotted onto Immobilon-P membranes (Millipore) before  
639 immunodetection using Merck Millipore antibodies recognizing either unmodified histone H4 (#05-858),  
640 H3K27me3 (#07-360) or custom-made rice histone H2B antibody generated by Prof. David Spiker  
641 (Bourbousse, Ahmed et al. 2012).

#### 642 **RNA-seq**

643 RNA was isolated using modified TRIzol method (Chomczynski and Sacchi 1987). Ribosomal RNA was  
644 removed using RiboMinus Plant Kit (Thermo Fisher) and ERCC RNA Spike-In Mix 1 (Thermo Fisher) was  
645 added. Libraries were prepared with Ion Total RNA-Seq Kit v2 and Ion Xpress RNA-Seq Barcode 1-16 Kit  
646 according to user guide. Sequencing template was generated with Ion PI™ Template OT2 200 Kit v3 on  
647 Ion OneTouch™ 2 System. Sequencing was performed on Ion PI™ chip v2 and Ion Proton™ sequencer  
648 using Ion PI™ Sequencing 200 Kit v2 (all Ion Torrent kits and software are trademarks of Thermo Fisher).

649 Base calling and adapter trimming was performed automatically by Torrent Suite software. Residual  
650 rRNA and ERCC reads were identified and filtered out using bbsplit and filterbyname scripts from  
651 BBTools suite (Brian Bushnell). Reads were aligned to TAIR10 genome using TMAP 5.0.13. with soft  
652 clipping from both ends and returning all the mappings with the best score. Other settings were set  
653 according to Torrent Suite defaults. Unaligned reads were aligned with BMAP (Brian Bushnell).  
654 Quantitation to ARAPORT11 transcripts and differential expression analysis was performed in Partek  
655 Flow (Partek Inc.) using Partek GSA algorithm.

656 The distribution of genes up-regulated in *3h1* versus all genes in *Arabidopsis thaliana* genome across  
657 chromatin states. Genomic coordinates for chromatin states (CS) locations across the genome were  
658 downloaded from published data (Sequeira-Mendes, Araguez et al. 2014). The genomic coordinates for

659 genes up-regulated in *3h1* were taken from TAIR 9 to be consistent with CS coordinates. Then, for each  
660 gene the percentage of overlapped chromatin states was calculated and for the final graph the summary  
661 of all analyzed genes was presented.

## 662 **MNase-seq data analysis**

663 Base calling and adapter trimming was performed automatically by Torrent Suite Software. Reads were  
664 aligned with TMAP 5.0.13. Soft clipping was turned off, end repair was allowed and all alignments for  
665 multi-mapping reads were reported. Other settings were set according to Torrent Suite defaults. Multi  
666 mapping read positions were resolved using MMR (Kahles, Behr et al. 2016) with default settings.

667 Peak calling was performed on reads reaching terminal adapter with length range between 147 and 220  
668 nt using set of custom made python scripts. First read centers were piled up and then highest coverage  
669 positions were selected using greedy algorithm. Ends of the longest read used to define position were  
670 used as peak boundaries. Peak was called only if its boundaries were not overlapping those of  
671 neighboring peak. NRLs were defined by calculating peak-to-peak distances from peak calling results.  
672 The frequency of distances was calculated as a percentage of all measurements and binned into three  
673 groups. Histograms were plotted in Microsoft Excel.

674 Quantile normalized wiggle occupancy files were generated with DANPOS2 (Chen, Xi et al. 2013) with  
675 default settings. To avoid shifting of read positions (automatic procedure for single-end reads), program  
676 was fed with “fake 75 nt paired-end” bed files, generated from both ends of alignments of fully-  
677 sequenced reads. Wig files were converted to BigWig format using UCSC wigToBigWig (Kent, Zweig et al.  
678 2010) and used in deepTools (Ramirez, Ryan et al. 2016) for plotting.

679 *Filtering out Ler residual sequences.* Despite series of five backcrosses after introduction of *h1.3* mutant  
680 allele from Ler background into our *h1.1h1.2h1.3* (Col-0) line, some residual Ler sequences were still  
681 present, mainly neighboring the *H1.3* gene To avoid interference from those sequences in our analyses,  
682 we identified their precise genomic coordinates using SNP and coverage analyses by comparing to

683 sequenced genome of parent Ler h1.3 line. We used those coordinates to generate bed files and filter  
684 out all reads overlapping residual Ler sequences using bedtools intersect (Quinlan and Hall 2010).  
685 Boxplots were obtained with R software.

#### 686 **MNse-seq and RNA-seq data accession**

687 The data for MNse-seq and RNA-seq discussed in this publication have been deposited in NCBI's Gene  
688 Expression Omnibus (Edgar, Domrachev et al. 2002) and are accessible through GEO Series accession  
689 number GSE113558 (<https://www.ncbi.nlm.nih.gov/geo/query/acc.cgi?acc=GSE113558>). Secure token is  
690 qtyrkcsentqrct.

#### 691 **Acknowledgements**

692 This work was supported by the Polish National Science Centre (2011/01/N/NZ2/04849) for M.L., the  
693 University of Zürich (Forschungskredit) and Plant Fellows Fellowship to K.R., the Swiss National Science  
694 Foundation (SNF 310013A/149974 /SystemsX.ch 2014/235 to CB and SNF grants to CR and TNF),  
695 Ministry of Sciences and Higher Education grant MNiSW/PO4A/03928 grant for A.J., the Investissements  
696 d'Avenir program launched by the French Government and implemented by ANR (ANR-10-LABX-54  
697 MEMOLIFE and ANR-10-IDEX-0001-02 PSL\* Research University), and a PhD fellowship from the  
698 Université Paris-Sud Doctoral School in Plant Sciences to GT and the COST Action CA1612 INDEPTH. We  
699 thank Prof. Ueli Grossniklaus for valuable advice and insightful discussions, for sharing laboratory  
700 facilities and support from management personal (V.Gagliardini, C.Eichenberger, A.Bolanos), Daniel  
701 Prata for technical assistance in plant growth and selection, Stefan Wyder (URPP, University of Zürich)  
702 for advice on statistical tests, D.Bergman (UCLA, USA) for advice on stomata analysis, M. Ingouff (IRD  
703 Montpellier, France) for sharing the DynaMET lines, Mariamawit Ashenafi (University of Zurich) for the  
704 raw image used for the Figure items 1c-e and technical assistance for immunostaining, Chris Bowler and  
705 Vincent Colot (IBENS, Paris) for constant support and helpful discussions to FB, Marek Kalinowski for



706 scripts to analyze chromatin states distribution. We acknowledge the professional service and support  
707 of the Cell Sorting and Microscopy Facility of the University of Zürich for nuclei sorting, STED and GSD  
708 imaging, TEM preparation, FRAP imaging and advice in data analysis (Urs Ziegler, Jana Dohner, Andres  
709 Kaech, Claudia Dumrese and Moritz Kirschman). We thank Marta Koblowaska for sharing the facilities of  
710 Laboratory of Microarray Analysis for RNA-seq and MNse-seq experiments and Maciej Kotliński for  
711 conceptual support in designing and analyzing for RNA-seq and MNse-seq experiments.

### 712 **Author contributions**

713 KR, ML, AJ and CB designed the project and the experiments; FB, CR, LC designed and coached specific  
714 project parts (cytogenetic and ultrastructural analyses); KR, ML, BM, JS, GT, IM, MK, FT, SF, SG and CB  
715 performed experiments/analysed data. KR and CB wrote the manuscript, FB and AJ contributed  
716 substantial revisions, all authors read and commented the manuscript.

### 717 **Competing interests**

718 No competing interest declared

### 719 **References**

720 Almassalha, L. M., A. Tiwari, P. T. Ruhoff, Y. Stypula-Cyrus, L. Cherkezyan, H. Matsuda, M. A. Dela Cruz, J.  
721 E. Chandler, C. White, C. Maneval, H. Subramanian, I. Szleifer, H. K. Roy and V. Backman (2017). "The  
722 Global Relationship between Chromatin Physical Topology, Fractal Structure, and Gene Expression." Sci  
723 Rep **7**: 41061.  
724 Almeida, R., J. M. Fernandez-Justel, C. Santa-Maria, J. C. Cadoret, L. Cano-Aroca, R. Lombrana, G.  
725 Herranz, A. Agresti and M. Gomez (2018). "Chromatin conformation regulates the coordination between  
726 DNA replication and transcription." Nat Commun **9**(1): 1590.

727 Andrey, P., K. Kieu, C. Kress, G. Lehmann, L. Tirichine, Z. Liu, E. Biot, P. G. Adenot, C. Hue-Beauvais, N.  
728 Houba-Herlin, V. Duranthon, E. Devinoy, N. Beaujean, V. Gaudin, Y. Maurin and P. Debey (2010).  
729 "Statistical analysis of 3D images detects regular spatial distributions of centromeres and chromocenters  
730 in animal and plant nuclei." PLoS Comput Biol **6**(7): e1000853.

731 Ashenafi, M. S. and C. Baroux (2018). "Automated 3D Gene Position Analysis Using a Customized Imaris  
732 Plugin: XTFISHInsideNucleus." Methods Mol Biol **1675**: 591-613.

733 Ausio, J. (2000). "Are linker histones (histone H1) dispensable for survival?" Bioessays **22**(10): 873-877.

734 Baldi, S., S. Krebs, H. Blum and P. B. Becker (2018). "Genome-wide measurement of local nucleosome  
735 array regularity and spacing by nanopore sequencing." bioRxiv.

736 Bednar, J., I. Garcia-Saez, R. Boopathi, A. R. Cutter, G. Papai, A. Reymer, S. H. Syed, I. N. Lone, O.  
737 Tonchev, C. Crucifix, H. Menoni, C. Papin, D. A. Skoufias, H. Kurumizaka, R. Lavery, A. Hamiche, J. J.  
738 Hayes, P. Schultz, D. Angelov, C. Petosa and S. Dimitrov (2017). "Structure and Dynamics of a 197 bp  
739 Nucleosome in Complex with Linker Histone H1." Mol Cell **66**(3): 384-397 e388.

740 Beshnova, D. A., A. G. Cherstvy, Y. Vainshtein and V. B. Teif (2014). "Regulation of the nucleosome  
741 repeat length in vivo by the DNA sequence, protein concentrations and long-range interactions." PLoS  
742 Comput Biol **10**(7): e1003698.

743 Boskovic, A., A. Eid, J. Pontabry, T. Ishiuchi, C. Spiegelhalter, E. V. Raghu Ram, E. Meshorer and M. E.  
744 Torres-Padilla (2014). "Higher chromatin mobility supports totipotency and precedes pluripotency in  
745 vivo." Genes Dev **28**(10): 1042-1047.

746 Boule, J. B., J. Mozziconacci and C. Lavelle (2015). "The polymorphisms of the chromatin fiber." J Phys  
747 Condens Matter **27**(3): 033101.

748 Bourbousse, C., I. Ahmed, F. Roudier, G. Zabulon, E. Blondet, S. Balzergue, V. Colot, C. Bowler and F.  
749 Barneche (2012). "Histone H2B monoubiquitination facilitates the rapid modulation of gene expression  
750 during Arabidopsis photomorphogenesis." PLoS Genet **8**(7): e1002825.

751 Bourbousse, C., I. Mestiri, G. Zabulon, M. Bourge, F. Formiggini, M. A. Koini, S. C. Brown, P. Fransz, C.  
752 Bowler and F. Barneche (2015). "Light signaling controls nuclear architecture reorganization during  
753 seedling establishment." Proc Natl Acad Sci U S A **112**(21): E2836-2844.

754 Bouyer, D., F. Roudier, M. Heese, E. D. Andersen, D. Gey, M. K. Nowack, J. Goodrich, J. P. Renou, P. E.  
755 Grini, V. Colot and A. Schnittger (2011). "Polycomb repressive complex 2 controls the embryo-to-  
756 seedling phase transition." PLoS Genet **7**(3): e1002014.

757 Bowler, C., G. Benvenuto, P. Laflamme, D. Molino, A. V. Probst, M. Tariq and J. Paszkowski (2004).  
758 "Chromatin techniques for plant cells." Plant J **39**(5): 776-789.

759 Bustin, M., F. Catez and J. H. Lim (2005). "The dynamics of histone H1 function in chromatin." Mol Cell  
760 **17**(5): 617-620.

761 Cao, K., N. Lailier, Y. Zhang, A. Kumar, K. Uppal, Z. Liu, E. K. Lee, H. Wu, M. Medrzycki, C. Pan, P. Y. Ho, G.  
762 P. Cooper, Jr., X. Dong, C. Bock, E. E. Bouhassira and Y. Fan (2013). "High-resolution mapping of h1 linker  
763 histone variants in embryonic stem cells." PLoS Genet **9**(4): e1003417.

764 Chen, K., Y. Xi, X. Pan, Z. Li, K. Kaestner, J. Tyler, S. Dent, X. He and W. Li (2013). "DANPOS: dynamic  
765 analysis of nucleosome position and occupancy by sequencing." Genome Res **23**(2): 341-351.

766 Cherkezyan, L., Y. Stypula-Cyrus, H. Subramanian, C. White, M. Dela Cruz, R. K. Wali, M. J. Goldberg, L. K.  
767 Bianchi, H. K. Roy and V. Backman (2014). "Nanoscale changes in chromatin organization represent the  
768 initial steps of tumorigenesis: a transmission electron microscopy study." BMC Cancer **14**: 189.

769 Chodavarapu, R. K., S. Feng, Y. V. Bernatavichute, P. Y. Chen, H. Stroud, Y. Yu, J. A. Hetzel, F. Kuo, J. Kim,  
770 S. J. Cokus, D. Casero, M. Bernal, P. Huijser, A. T. Clark, U. Kramer, S. S. Merchant, X. Zhang, S. E.  
771 Jacobsen and M. Pellegrini (2010). "Relationship between nucleosome positioning and DNA  
772 methylation." Nature **466**(7304): 388-392.

773 Chomczynski, P. and N. Sacchi (1987). "Single-step method of RNA isolation by acid guanidinium  
774 thiocyanate-phenol-chloroform extraction." Anal Biochem **162**(1): 156-159.

775 Christophorou, M. A., G. Castelo-Branco, R. P. Halley-Stott, C. S. Oliveira, R. Loos, A. Radzsheuskaya, K.  
776 A. Mowen, P. Bertone, J. C. Silva, M. Zernicka-Goetz, M. L. Nielsen, J. B. Gurdon and T. Kouzarides  
777 (2014). "Citruination regulates pluripotency and histone H1 binding to chromatin." Nature **507**(7490):  
778 104-108.

779 Clough, S. J. and A. F. Bent (1998). "Floral dip: a simplified method for *Agrobacterium*-mediated  
780 transformation of *Arabidopsis thaliana*." Plant J **16**(6): 735-743.

781 Correll, S. J., M. H. Schubert and S. A. Grigoryev (2012). "Short nucleosome repeats impose rotational  
782 modulations on chromatin fibre folding." EMBO J **31**(10): 2416-2426.

783 Cortijo, S., Z. Aydin, S. Ahnert and J. Locke (2018). "Widespread inter-individual gene expression  
784 variability in *Arabidopsis thaliana*." bioRxiv.

785 Du, J., X. Zhong, Y. V. Bernatavichute, H. Stroud, S. Feng, E. Caro, A. A. Vashisht, J. Terragni, H. G. Chin, A.  
786 Tu, J. Hetzel, J. A. Wohlschlegel, S. Pradhan, D. J. Patel and S. E. Jacobsen (2012). "Dual binding of  
787 chromomethylase domains to H3K9me2-containing nucleosomes directs DNA methylation in plants."  
788 Cell **151**(1): 167-180.

789 Edgar, R., M. Domrachev and A. E. Lash (2002). "Gene Expression Omnibus: NCBI gene expression and  
790 hybridization array data repository." Nucleic Acids Res **30**(1): 207-210.

791 Fabrice T, N., L. Cherkezeyan, C. Ringli and C. Baroux (2017). Transmission Electron Microscopy Imaging  
792 to analyse chromatin density distribution at the nanoscale level. Methods Mol Biol. NY, Springer.

793 Fan, Y., T. Nikitina, J. Zhao, T. J. Fleury, R. Bhattacharyya, E. E. Bouhassira, A. Stein, C. L. Woodcock and  
794 A. I. Skoultchi (2005). "Histone H1 depletion in mammals alters global chromatin structure but causes  
795 specific changes in gene regulation." Cell **123**(7): 1199-1212.

796 Fransz, P., J. H. De Jong, M. Lysak, M. R. Castiglione and I. Schubert (2002). "Interphase chromosomes in  
797 *Arabidopsis* are organized as well defined chromocenters from which euchromatin loops emanate." Proc  
798 Natl Acad Sci U S A **99**(22): 14584-14589.

799 Fyodorov, D. V., B. R. Zhou, A. I. Skoultchi and Y. Bai (2018). "Emerging roles of linker histones in  
800 regulating chromatin structure and function." Nat Rev Mol Cell Biol **19**(3): 192-206.

801 Geeven, G., Y. Zhu, B. J. Kim, B. A. Bartholdy, S. M. Yang, T. S. Macfarlan, W. D. Gifford, S. L. Pfaff, M. J.  
802 Versteegen, H. Pinto, M. W. Vermunt, M. P. Creyghton, P. J. Wijchers, J. A. Stamatoyannopoulos, A. I.  
803 Skoultchi and W. de Laat (2015). "Local compartment changes and regulatory landscape alterations in  
804 histone H1-depleted cells." Genome Biol **16**: 289.

805 Gu, X., T. Xu and Y. He (2014). "A histone H3 lysine-27 methyltransferase complex represses lateral root  
806 formation in *Arabidopsis thaliana*." Mol Plant **7**(6): 977-988.

807 Hajkova, P., K. Ancelin, T. Waldmann, N. Lacoste, U. C. Lange, F. Cesari, C. Lee, G. Almouzni, R. Schneider  
808 and M. A. Surani (2008). "Chromatin dynamics during epigenetic reprogramming in the mouse germ  
809 line." Nature **452**(7189): 877-881.

810 He, C., X. Chen, H. Huang and L. Xu (2012). "Reprogramming of H3K27me3 is critical for acquisition of  
811 pluripotency from cultured *Arabidopsis* tissues." PLoS Genet **8**(8): e1002911.

812 Hellauer, K., E. Sirard and B. Turcotte (2001). "Decreased expression of specific genes in yeast cells  
813 lacking histone H1." J Biol Chem **276**(17): 13587-13592.

814 Hergeth, S. P. and R. Schneider (2015). "The H1 linker histones: multifunctional proteins beyond the  
815 nucleosomal core particle." EMBO Rep **16**(11): 1439-1453.

816 Herrera, J. E., K. L. West, R. L. Schiltz, Y. Nakatani and M. Bustin (2000). "Histone H1 is a specific  
817 repressor of core histone acetylation in chromatin." Mol Cell Biol **20**(2): 523-529.

818 Ingouff, M., B. Selles, C. Michaud, T. M. Vu, F. Berger, A. J. Schorn, D. Autran, M. Van Durme, M. K.  
819 Nowack, R. A. Martienssen and D. Grimanelli (2017). "Live-cell analysis of DNA methylation during sexual  
820 reproduction in *Arabidopsis* reveals context and sex-specific dynamics controlled by noncanonical  
821 RdDM." Genes Dev **31**(1): 72-83.

822 Iwasaki, Y. W., K. Murano, H. Ishizu, A. Shibuya, Y. Iyoda, M. C. Siomi, H. Siomi and K. Saito (2016). "Piwi  
823 Modulates Chromatin Accessibility by Regulating Multiple Factors Including Histone H1 to Repress  
824 Transposons." Mol Cell **63**(3): 408-419.

825 Izzo, A. and R. Schneider (2016). "The role of linker histone H1 modifications in the regulation of gene  
826 expression and chromatin dynamics." Biochim Biophys Acta **1859**(3): 486-495.

827 Jedrusik, M. A. and E. Schulze (2001). "A single histone H1 isoform (H1.1) is essential for chromatin  
828 silencing and germline development in *Caenorhabditis elegans*." Development **128**(7): 1069-1080.

829 Jerzmanowski, A. (2007). "SWI/SNF chromatin remodeling and linker histones in plants." Biochim  
830 Biophys Acta **1769**(5-6): 330-345.

831 Jerzmanowski, A., M. Przewłoka and K. D. Grasser (2000). "Linker Histones and HMG1 Proteins of Higher  
832 Plants." Plant Biology **2**(6): 586-597.

833 Kahles, A., J. Behr and G. Ratsch (2016). "MMR: a tool for read multi-mapper resolution." Bioinformatics  
834 **32**(5): 770-772.

835 Kasinsky, H. E., J. D. Lewis, J. B. Dacks and J. Ausio (2001). "Origin of H1 linker histones." FASEB J **15**(1):  
836 34-42.

837 Kent, W. J., A. S. Zweig, G. Barber, A. S. Hinrichs and D. Karolchik (2010). "BigWig and BigBed: enabling  
838 browsing of large distributed datasets." Bioinformatics **26**(17): 2204-2207.

839 Kotlinski, M., L. Knizewski, A. Muszewska, K. Rutowicz, M. Lirski, A. Schmidt, C. Baroux, K. Ginalski and A.  
840 Jerzmanowski (2017). "Phylogeny-Based Systematization of Arabidopsis Proteins with Histone H1  
841 Globular Domain." Plant Physiol **174**(1): 27-34.

842 Kutter, C., H. Schob, M. Stadler, F. Meins, Jr. and A. Si-Ammour (2007). "MicroRNA-mediated regulation  
843 of stomatal development in Arabidopsis." Plant Cell **19**(8): 2417-2429.

844 Lau, O. S. and D. C. Bergmann (2012). "Stomatal development: a plant's perspective on cell polarity, cell  
845 fate transitions and intercellular communication." Development **139**(20): 3683-3692.

846 Launholt, D., J. T. Gronlund, H. K. Nielsen and K. D. Grasser (2007). "Overlapping expression patterns  
847 among the genes encoding Arabidopsis chromosomal high mobility group (HMG) proteins." FEBS Lett  
848 **581**(6): 1114-1118.

849 Lee, E., J. R. Lucas, J. Goodrich and F. D. Sack (2014). "Arabidopsis guard cell integrity involves the  
850 epigenetic stabilization of the FLP and FAMA transcription factor genes." Plant J **78**(4): 566-577.

851 Li, G., S. Liu, J. Wang, J. He, H. Huang, Y. Zhang and L. Xu (2014). "ISWI proteins participate in the  
852 genome-wide nucleosome distribution in Arabidopsis." Plant J **78**(4): 706-714.

853 Lu, X., S. N. Wontakal, A. V. Emelyanov, P. Morcillo, A. Y. Konev, D. V. Fyodorov and A. I. Skoultchi  
854 (2009). "Linker histone H1 is essential for Drosophila development, the establishment of pericentric  
855 heterochromatin, and a normal polytene chromosome structure." Genes Dev **23**(4): 452-465.

856 Lu, X., S. N. Wontakal, H. Kavi, B. J. Kim, P. M. Guzzardo, A. V. Emelyanov, N. Xu, G. J. Hannon, J. Zavadil,  
857 D. V. Fyodorov and A. I. Skoultchi (2013). "Drosophila H1 regulates the genetic activity of  
858 heterochromatin by recruitment of Su(var)3-9." Science **340**(6128): 78-81.

859 Lucas, M., K. Kenobi, D. von Wangenheim, U. Vobeta, K. Swarup, I. De Smet, D. Van Damme, T.  
860 Lawrence, B. Peret, E. Moscardi, D. Barbeau, C. Godin, D. Salt, S. Guyomarc'h, E. H. Stelzer, A. Maizel, L.  
861 Laplaze and M. J. Bennett (2013). "Lateral root morphogenesis is dependent on the mechanical  
862 properties of the overlaying tissues." Proc Natl Acad Sci U S A **110**(13): 5229-5234.

863 Lyons, D. B. and D. Zilberman (2017). "DDM1 and Lsh remodelers allow methylation of DNA wrapped in  
864 nucleosomes." Elife **6**.

865 Maeshima, K., R. Rogge, S. Tamura, Y. Joti, T. Hikima, H. Szerlong, C. Krause, J. Herman, E. Seidel, J.  
866 DeLuca, T. Ishikawa and J. C. Hansen (2016). "Nucleosomal arrays self-assemble into supramolecular  
867 globular structures lacking 30-nm fibers." EMBO J **35**(10): 1115-1132.

868 Maizel, A., D. von Wangenheim, F. Federici, J. Haseloff and E. H. Stelzer (2011). "High-resolution live  
869 imaging of plant growth in near physiological bright conditions using light sheet fluorescence  
870 microscopy." Plant J **68**(2): 377-385.

871 Malamy, J. E. and P. N. Benfey (1997). "Organization and cell differentiation in lateral roots of  
872 *Arabidopsis thaliana*." Development **124**(1): 33-44.

873 Martin, C., R. Cao and Y. Zhang (2006). "Substrate preferences of the EZH2 histone methyltransferase  
874 complex." J Biol Chem **281**(13): 8365-8370.

875 Molitor, A. M., Z. Bu, Y. Yu and W. H. Shen (2014). "Arabidopsis AL PHD-PRC1 complexes promote seed  
876 germination through H3K4me3-to-H3K27me3 chromatin state switch in repression of seed  
877 developmental genes." PLoS Genet **10**(1): e1004091.

878 Nakabayashi, K., M. Bartsch, Y. Xiang, E. Miatton, S. Pellengahr, R. Yano, M. Seo and W. J. Soppe (2012).  
879 "The time required for dormancy release in Arabidopsis is determined by DELAY OF GERMINATION1  
880 protein levels in freshly harvested seeds." Plant Cell **24**(7): 2826-2838.

881 Pan, C. and Y. Fan (2016). "Role of H1 linker histones in mammalian development and stem cell  
882 differentiation." Biochim Biophys Acta **1859**(3): 496-509.

883 Pass, D. A., E. Sornay, A. Marchbank, M. R. Crawford, K. Paszkiewicz, N. A. Kent and J. A. H. Murray  
884 (2017). "Genome-wide chromatin mapping with size resolution reveals a dynamic sub-nucleosomal  
885 landscape in Arabidopsis." PLoS Genet **13**(9): e1006988.

886 Patterton, H. G., C. C. Landel, D. Landsman, C. L. Peterson and R. T. Simpson (1998). "The biochemical  
887 and phenotypic characterization of Hho1p, the putative linker histone H1 of *Saccharomyces cerevisiae*."  
888 J Biol Chem **273**(13): 7268-7276.

889 Pavlova, P., F. Tessadori, H. J. de Jong and P. Fransz (2010). "Immunocytological analysis of chromatin in  
890 isolated nuclei." Methods Mol Biol **655**: 413-432.



891 Phair, R. D., S. A. Gorski and T. Misteli (2004). "Measurement of dynamic protein binding to chromatin in  
892 vivo, using photobleaching microscopy." Methods Enzymol **375**: 393-414.

893 Postnikov, Y. V. and M. Bustin (2016). "Functional interplay between histone H1 and HMG proteins in  
894 chromatin." Biochim Biophys Acta **1859**(3): 462-467.

895 Prymakowska-Bosak, M., M. R. Przewloka, J. Iwkiewicz, S. Egierszdorff, M. Kuras, N. Chaubet, C. Gigot, S.  
896 Spiker and A. Jerzmanowski (1996). "Histone H1 overexpressed to high level in tobacco affects certain  
897 developmental programs but has limited effect on basal cellular functions." Proc Natl Acad Sci U S A  
898 **93**(19): 10250-10255.

899 Quinlan, A. R. and I. M. Hall (2010). "BEDTools: a flexible suite of utilities for comparing genomic  
900 features." Bioinformatics **26**(6): 841-842.

901 Ramirez, F., D. P. Ryan, B. Gruning, V. Bhardwaj, F. Kilpert, A. S. Richter, S. Heyne, F. Dundar and T.  
902 Manke (2016). "deepTools2: a next generation web server for deep-sequencing data analysis." Nucleic  
903 Acids Res **44**(W1): W160-165.

904 Rea, M., W. Zheng, M. Chen, C. Braud, D. Bhangu, T. N. Rognan and W. Xiao (2012). "Histone H1 affects  
905 gene imprinting and DNA methylation in Arabidopsis." Plant J **71**(5): 776-786.

906 Ricci, M. A., C. Manzo, M. F. Garcia-Parajo, M. Lakadamyali and M. P. Cosma (2015). "Chromatin fibers  
907 are formed by heterogeneous groups of nucleosomes in vivo." Cell **160**(6): 1145-1158.

908 Rosa, S., V. Ntoukakis, N. Ohmido, A. Pendle, R. Abranches and P. Shaw (2014). "Cell differentiation and  
909 development in Arabidopsis are associated with changes in histone dynamics at the single-cell level."  
910 Plant Cell **26**(12): 4821-4833.

911 Roudier, F., I. Ahmed, C. Berard, A. Sarazin, T. Mary-Huard, S. Cortijo, D. Bouyer, E. Caillieux, E.  
912 Duvernois-Berthet, L. Al-Shikhley, L. Giraut, B. Despres, S. Drevensek, F. Barneche, S. Derozier, V.  
913 Brunaud, S. Aubourg, A. Schnittger, C. Bowler, M. L. Martin-Magniette, S. Robin, M. Caboche and V.

914 Colot (2011). "Integrative epigenomic mapping defines four main chromatin states in Arabidopsis."  
915 EMBO J **30**(10): 1928-1938.

916 Routh, A., S. Sandin and D. Rhodes (2008). "Nucleosome repeat length and linker histone stoichiometry  
917 determine chromatin fiber structure." Proc Natl Acad Sci U S A **105**(26): 8872-8877.

918 Rutowicz, K., M. Puzio, J. Halibart-Puzio, M. Lirski, M. Kotlinski, M. A. Kroten, L. Knizewski, B. Lange, A.  
919 Muszewska, K. Sniegowska-Swierk, J. Koscielniak, R. Iwanicka-Nowicka, K. Buza, F. Janowiak, K. Zmuda, I.  
920 Joesaar, K. Laskowska-Kaszub, A. Fogtman, H. Kollist, P. Zielenkiewicz, J. Tiuryn, P. Siedlecki, S.  
921 Swiezewski, K. Ginalski, M. Koblowska, R. Archacki, B. Wilczynski, M. Rapacz and A. Jerzmanowski  
922 (2015). "A Specialized Histone H1 Variant Is Required for Adaptive Responses to Complex Abiotic Stress  
923 and Related DNA Methylation in Arabidopsis." Plant Physiol **169**(3): 2080-2101.

924 Salazar-Henao, J. E., I. C. Velez-Bermudez and W. Schmidt (2016). "The regulation and plasticity of root  
925 hair patterning and morphogenesis." Development **143**(11): 1848-1858.

926 Sancho, M., E. Diani, M. Beato and A. Jordan (2008). "Depletion of human histone H1 variants uncovers  
927 specific roles in gene expression and cell growth." PLoS Genet **4**(10): e1000227.

928 Schindelin, J., I. Arganda-Carreras, E. Frise, V. Kaynig, M. Longair, T. Pietzsch, S. Preibisch, C. Rueden, S.  
929 Saalfeld, B. Schmid, J. Y. Tinevez, D. J. White, V. Hartenstein, K. Eliceiri, P. Tomancak and A. Cardona  
930 (2012). "Fiji: an open-source platform for biological-image analysis." Nat Methods **9**(7): 676-682.

931 Schwabish, M. A. and K. Struhl (2004). "Evidence for eviction and rapid deposition of histones upon  
932 transcriptional elongation by RNA polymerase II." Mol Cell Biol **24**(23): 10111-10117.

933 Sequeira-Mendes, J., I. Araguez, R. Peiro, R. Mendez-Giraldez, X. Zhang, S. E. Jacobsen, U. Bastolla and C.  
934 Gutierrez (2014). "The Functional Topography of the Arabidopsis Genome Is Organized in a Reduced  
935 Number of Linear Motifs of Chromatin States." Plant Cell **26**(6): 2351-2366.

936 Seymour, M., L. Ji, A. M. Santos, M. Kamei, T. Sasaki, E. Y. Basenko, R. J. Schmitz, X. Zhang and Z. A. Lewis  
937 (2016). "Histone H1 Limits DNA Methylation in *Neurospora crassa*." G3 (Bethesda) **6**(7): 1879-1889.

938 Shaver, S., J. A. Casas-Mollano, R. L. Cerny and H. Cerutti (2010). "Origin of the polycomb repressive  
939 complex 2 and gene silencing by an E(z) homolog in the unicellular alga *Chlamydomonas*." Epigenetics  
940 **5**(4): 301-312.

941 She, W. and C. Baroux (2015). "Chromatin dynamics in pollen mother cells underpin a common scenario  
942 at the somatic-to-reproductive fate transition of both the male and female lineages in *Arabidopsis*."  
943 Front Plant Sci **6**: 294.

944 She, W., D. Grimanelli, K. Rutowicz, M. W. Whitehead, M. Puzio, M. Kotlinski, A. Jerzmanowski and C.  
945 Baroux (2013). "Chromatin reprogramming during the somatic-to-reproductive cell fate transition in  
946 plants." Development **140**(19): 4008-4019.

947 Shen, X. and M. A. Gorovsky (1996). "Linker histone H1 regulates specific gene expression but not global  
948 transcription in vivo." Cell **86**(3): 475-483.

949 Shen, X., L. Yu, J. W. Weir and M. A. Gorovsky (1995). "Linker histones are not essential and affect  
950 chromatin condensation in vivo." Cell **82**(1): 47-56.

951 Sigman, M. J. and R. K. Slotkin (2016). "The First Rule of Plant Transposable Element Silencing: Location,  
952 Location, Location." Plant Cell **28**(2): 304-313.

953 Soppe, W. J., Z. Jasencakova, A. Houben, T. Kakutani, A. Meister, M. S. Huang, S. E. Jacobsen, I. Schubert  
954 and P. F. Fransz (2002). "DNA methylation controls histone H3 lysine 9 methylation and heterochromatin  
955 assembly in *Arabidopsis*." EMBO J **21**(23): 6549-6559.

956 Usachenko, S. I., I. M. Gavin and S. G. Bavykin (1996). "Alterations in nucleosome core structure in linker  
957 histone-depleted chromatin." J Biol Chem **271**(7): 3831-3836.

958 Ushinsky, S. C., H. Bussey, A. A. Ahmed, Y. Wang, J. Friesen, B. A. Williams and R. K. Storms (1997).  
959 "Histone H1 in *Saccharomyces cerevisiae*." Yeast **13**(2): 151-161.

960 Van Norman, J. M., W. Xuan, T. Beeckman and P. N. Benfey (2013). "To branch or not to branch: the role  
961 of pre-patterning in lateral root formation." Development **140**(21): 4301-4310.

962 Vergara, Z. and C. Gutierrez (2017). "Emerging roles of chromatin in the maintenance of genome  
963 organization and function in plants." Genome Biol **18**(1): 96.

964 Wang, H., C. Liu, J. Cheng, J. Liu, L. Zhang, C. He, W. H. Shen, H. Jin, L. Xu and Y. Zhang (2016).  
965 "Arabidopsis Flower and Embryo Developmental Genes are Repressed in Seedlings by Different  
966 Combinations of Polycomb Group Proteins in Association with Distinct Sets of Cis-regulatory Elements."  
967 PLoS Genet **12**(1): e1005771.

968 Wang, X., R. D. Paucek, A. R. Gooding, Z. Z. Brown, E. J. Ge, T. W. Muir and T. R. Cech (2017). "Molecular  
969 analysis of PRC2 recruitment to DNA in chromatin and its inhibition by RNA." Nat Struct Mol Biol **24**(12):  
970 1028-1038.

971 Wierzbicki, A. T. and A. Jerzmanowski (2005). "Suppression of histone H1 genes in Arabidopsis results in  
972 heritable developmental defects and stochastic changes in DNA methylation." Genetics **169**(2): 997-  
973 1008.

974 Wood, C. C., M. Robertson, G. Tanner, W. J. Peacock, E. S. Dennis and C. A. Helliwell (2006). "The  
975 Arabidopsis thaliana vernalization response requires a polycomb-like protein complex that also includes  
976 VERNALIZATION INSENSITIVE 3." Proc Natl Acad Sci U S A **103**(39): 14631-14636.

977 Xu, N., X. Lu, H. Kavi, A. V. Emelyanov, T. J. Bernardo, E. Vershilova, A. I. Skoultchi and D. V. Fyodorov  
978 (2016). "BEN domain protein Elba2 can functionally substitute for linker histone H1 in Drosophila in  
979 vivo." Sci Rep **6**: 34354.

980 Yang, S. M., B. J. Kim, L. Norwood Toro and A. I. Skoultchi (2013). "H1 linker histone promotes epigenetic  
981 silencing by regulating both DNA methylation and histone H3 methylation." Proc Natl Acad Sci U S A  
982 **110**(5): 1708-1713.

983 Zemach, A., M. Y. Kim, P. H. Hsieh, D. Coleman-Derr, L. Eshed-Williams, K. Thao, S. L. Harmer and D.  
984 Zilberman (2013). "The Arabidopsis nucleosome remodeler DDM1 allows DNA methyltransferases to  
985 access H1-containing heterochromatin." Cell **153**(1): 193-205.

- 986 Zhang, X., O. Clarenz, S. Cokus, Y. V. Bernatavichute, M. Pellegrini, J. Goodrich and S. E. Jacobsen (2007).  
987 "Whole-genome analysis of histone H3 lysine 27 trimethylation in Arabidopsis." PLoS Biol **5**(5): e129.
- 988 Zhang, Y., M. Cooke, S. Panjwani, K. Cao, B. Krauth, P. Y. Ho, M. Medrzycki, D. T. Berhe, C. Pan, T. C.  
989 McDevitt and Y. Fan (2012). "Histone h1 depletion impairs embryonic stem cell differentiation." PLoS  
990 Genet **8**(5): e1002691.
- 991 Zhou, B. R., H. Feng, H. Kato, L. Dai, Y. Yang, Y. Zhou and Y. Bai (2013). "Structural insights into the  
992 histone H1-nucleosome complex." Proc Natl Acad Sci U S A **110**(48): 19390-19395.
- 993 Zhu, D., S. Rosa and C. Dean (2015). "Nuclear organization changes and the epigenetic silencing of FLC  
994 during vernalization." J Mol Biol **427**(3): 659-669.
- 995

996 **Figure legends**

997 **Figure 1. Loss of H1 variants leads to global chromatin decondensation but is dispensable for**  
998 **heterochromatin identity.**

999 Cytogenetic (A-E, H) and nucleosome profile (F, G) analyses of chromatin organization in triple  
1000 *h1.1h1.2h1.3* (*3h1*) mutant and wild-type segregant (wt) seedlings. (A) H1 depletion induces a significant  
1001 reduction of the relative heterochromatin fraction (RHF), the number of chromocenters (CCs) and an  
1002 increase in nuclear size (area). \*\*\*, t-test, p-value < 0.001; error bars, standard error of the mean  
1003 (s.e.m). Cytological analyses on isolated, spread leaf nuclei. (B) Typical wt and *3h1* nuclei as used in (A),  
1004 stained with DAPI. (C) H1 depletion induces a spatial dispersion of the centromeric repeats (CEN, purple)  
1005 but not the 45S rDNA, Nucleolar Organization Region repeats (NOR, green) as shown by Fluorescent *In*  
1006 *Situ* Hybridization (FISH). (D) 3D segmentation of the CEN signals shows that the preferentially  
1007 peripheral localisation of CEN repeats is unaffected in *3h1* nuclei despite their lack of condensation. (E)  
1008 High-resolution imaging using STED microscopy and deconvolution-based reconstruction of *3h1* and wt  
1009 nuclei. Nanoscopic bodies of condensed chromatin are dispersed throughout the nucleus in *3h1* instead  
1010 of conspicuous chromocenters as in wt. (F) Nucleosome occupancy is lower in *3h1* heterochromatin,  
1011 along the corresponding chromatin states 8 and 9 (Sequeira-Mendes, Araguez et al. 2014). (G)  
1012 Distribution of Nucleosomal Repeat Lengths (NRLs) in wt and *3h1*, chi-square test, p-value < 0.0001  
1013 (\*\*\*). (H) The heterochromatic marks H3K9me1 and H3K27me1 are not reduced but redistributed in  
1014 *3h1* nuclei. Scale bar: 2µm. Isolated leaf nuclei were flow-sorted according to their 2C DNA content (A, B,  
1015 E, H).

1016 The following figure supplements are available for figure 1:

1017 **Figure 1 – figure supplement 1.** Chromocenter formation relies on H1.1 and H1.2 but not H1.3 in  
1018 differentiated, adult tissues.

1019 **Figure 1 – figure supplement 2.** H1 regulates chromatin-state dependent nucleosomal distribution.

1020 **Figure 1 – figure supplement 3.** Super families of TEs upregulated in *3h1* mutant.

1021

1022 **Figure 2. H1-depletion has a strong impact on euchromatin organization with increased dispersion of**  
1023 **nanoscopic domains, altered distribution of nucleosome coverage and increased mobility**

1024 **(A-B)** H1 is abundant in euchromatin distributed as discrete foci partially colocalizing with H2B. (A) H1  
1025 immunostaining and Propidium Iodide (PI) counterstaining, done as in Figure 1, (B) live histone reporter  
1026 imaging as indicated above the pictures. **(C-F)** Ultrastructural analysis of euchromatin organization in wt  
1027 vs *3h1*. (C) Typical TEM image of nuclei stained with uranylacetate on 7 nm cryosection (root epidermis,  
1028 see Methods), Scale Bar: 1 $\mu$ m, (D) representative region of interest (ROI) in euchromatin of wt and *3h1*  
1029 nuclei used for spatial autocorrelation function (ACF) analyses. Scale Bar: 500nm (E-F) Spatial chromatin  
1030 density analyses show decreased regularity in the spatial chromatin distribution pattern in *3h1* revealed  
1031 by a less shallow ACF curve within length scales of 20-60nm (grey zone, graph, E) and higher dispersion  
1032 of length scales as shown by bigger range of the estimate *D* characterizing the spatial autocorrelation fit  
1033 (F). These differences in *3h1* are restored upon complementation with an H1.1 expressing construct.

1034 **\*\*\***, unpaired t-test, p-value < 0.001. See also **Figure 2 – figure supplement 1.** **(G)** Nucleosome coverage  
1035 but not qualitative distribution is altered in H1 depleted euchromatin. Antagonist effects are seen for  
1036 regions of chromatin states CS 1, 3, 7 (CS1 only is shown here) and CS4 (CS according to (Sequeira-  
1037 Mendes, Araguez et al. 2014)). See also **Figure 1 – figure supplement 2** for nucleosome occupancy in  
1038 *3h1* and wt over regions from all chromatin states. **(H-I)** Chromatin mobility is dramatically increased in  
1039 *3h1* concomitantly to higher histone acetylation levels. (H), H2B-RFP fluorescence recovery in FRAP

1040 experiments, double normalisation, see Methods, (I) histone hyperacetylation in *3h1* leaf nuclei  
1041 (experimental approach as in Figure 1).

1042 The following figure supplements are available for figure 2:

1043 **Figure 2 – figure supplement 1.** H1-depletion induces spatial dispersion of structural chromatin domains  
1044 at the nanoscale level.

1045 **Figure 2 – figure supplement 2.** Chromatin mobility in meristematic nuclei is not affected by H1  
1046 depletion.

1047

1048 **Figure 3. H1 is necessary to secure transcriptional state-specific nucleosomal and epigenetic profiles**  
1049 **yet influence only a moderate gene fraction**

1050 **(A)** Nucleosome distribution profiles clearly defines distinct gene classes according to expression levels  
1051 in wild-type but no longer in *3h1*. Quintiles 5 to 1 represent categories of genes with expression levels  
1052 ranked from the highest to lowest level, respectively, as previously described (Rutowicz, Puzio et al.  
1053 2015). **(B)** H1 depletion induces moderate changes in the transcriptional profile yet a subset of 701  
1054 genes ( $p$ -value  $< 0.05$  and fold change  $> 2$ ) are misregulated. The volcano plot was cropped around the  
1055 denser part of the dataset. The full plot is presented in Figure 2- figure supplement 1. **(C)** Up regulated  
1056 loci show a characteristic nucleosome occupancy with high periodicity and a higher coverage in *3h1*  
1057 downstream the TSS. TSS, Transcription Start Site. **(D-E)** Decreased abundance of H3K27 and H3K4  
1058 trimethylation in *3h1* measured by quantitative immunostaining on isolated leaf nuclei. **(F)** A two-fold  
1059 reduction of H3K27me3 levels upon H1 depletion is confirmed by Western-Blot on seedling leaves, yet is  
1060 less dramatic than in a loss of PCR2 function mutant, *clf-29*. The original picture is presented in Figure 2-  
1061 figure supplement 2.



1062 **(G)** Genes which are up-regulated in *3h1* share a significant overlap with H3K27me3 targets defined by  
1063 (Zhang, Clarenz et al. 2007) (P=0.0007, Fisher exact test) but remain distinct from those affected by the  
1064 *clf-29* mutation (Wang, Liu et al. 2016). Legend: **(D)**, **(E)** green, immunostaining; red, DNA  
1065 counterstaining; graph, relative fluorescence intensity – antibody signals normalised over DNA content  
1066 (see Methods).

1067 The following figure supplements are available for figure 3:

1068 **Figure 3 – figure supplement 1.** Gene expression in *3h1* mutant.

1069 **Figure 3 – figure supplement 2.** Up- and down- regulated genes in *3h1* correspond to gene categories  
1070 with distinct expression strength in wild-type.

1071 **Figure 3 – figure supplement 3.** Distribution of chromatin states (CS) of all genes in the *Arabidopsis*  
1072 *thaliana* genome versus genes upregulated in *3h1* plants.

1073 **Figure 3 – figure supplement 4.** The overall distribution of CHH and CG is not affected in *3h1* mutant  
1074 nuclei.

1075 **Figure 3 – figure supplement 5.** H3, H3K4me2 and H3K27me2 are not affected by H1 depletion.

1076 **Figure 3 – figure supplement 6.** Global levels of H3K27me3 are reduced in *3h1* seedlings.

1077

1078 **Figure 4. H1-depletion relaxes the epigenetic control of several phase and cellular transitions**

1079 The *3h1* mutant shows relaxed control of seed dormancy **(A)**, flowering time **(B)**, lateral root formation  
1080 **(C)**, root hair density **(D)** and fate **(E)**, stomatal spacing **(F)** and is impaired reprogramming competence  
1081 *in vitro*. *3h1* shows, compared to wild-type **(A)** a delayed seed germination competence in mature seeds  
1082 1 day post harvest but not in dried seeds (3 weeks post harvest), **(B)** early flowering measured as the  
1083 number of rosette leaves at bolting, **(C)** increased number of lateral roots (8 DAG seedlings), **(D)**  
1084 increased root hair density, **(E)** occasional multicellular root hairs, **(F)** stomatal complexes with reduced

1085 spacing and supernumerary divisions of the lineage precursor (adaxial cotyledon epidermis, 10 DAG; DIC  
1086 pictures for wt and *3h1* (*middle*), Renaissance counterstaining (*3h1'*, *right*)), and **(G)** decreased callus  
1087 size under induction medium. Wild-type segregants (wt) were compared with triple mutant  
1088 tissues/seedlings (*3h1*) and, whenever indicated, with complemented lines expressing H1.1 and H1.2  
1089 variants only (*3h1*; H1) or all three variants (*3h1*; H1\*). Statistical tests (A,B Welch t.test; C, Fisher exact  
1090 test) were performed against wt replicates, \*\*\* p-value < 0.001, ns, not significant.

1091 The following figure supplements are available for figure 4:

1092 **Figure 4 – figure supplement 1.** Flowering time for h1 mutants and complemented lines.

1093 **Figure 4 – figure supplement 2.** H1 is required for correct developmental transitions. This figure shows  
1094 additional image and quantification material supporting Figure 4

1095 **Figure 4 – figure supplement 3.** Callus formation efficiency in H1 deficient mutants is reduced.

1096 **Figure 4 – figure supplement 4.** H1.2 levels decrease relative to H1.1 during cellular differentiation in  
1097 root.

1098

1099 **Figure 5. Model for H1 function in heterochromatin and euchromatin organization at the topological  
1100 and molecular level.**

1101 Graphical representation of H1 roles on chromatin organization at the cytological (spatial) and molecular  
1102 level based on analyses reported in this study. Heterochromatin: H1 is dispensable for silencing and  
1103 peripheral positioning of the vast majority of heterochromatic repeats but necessary for their molecular  
1104 assembly into compact chromocenter domains; yet a subset of Transposable Elements are directly  
1105 affected by H1 and become derepressed in its absence (yellow box, -H1). This indicates both H1-  
1106 independant and H1-dependent TE silencing controls. Euchromatin: Top right panel, H1 is necessary to  
1107 provide homogeneity in chromatin topology and spatial organization of chromatin domains. H1

1108 depletion results in both larger gaps between nanodomains, possibly enabling increased accessibility,  
1109 and irregular, high local compaction; this chromatin heterogeneity is reminiscent of H1-depleted  
1110 pluripotent cells (Ricci et al, 2015), cells with a loss of a SWI/SNF chromatin remodel function or  
1111 undergoing tumorigenic reprogramming (Almassalha, Tiwari et al. 2017). Concomitantly, H1 depleted  
1112 chromatin displays histone hyperacetylation (blue), increased mobility and poor maintenance of histone  
1113 H3 lysine 4 (green) and more strongly lysine 27 (red) methylation. At the molecular level (lower  
1114 panel), H1 provides distinct structural signatures (nucleosome coverage) at loci marked by distinct  
1115 expression rates but is not epistatic to transcriptional control for a majority of them (H1-independent  
1116 regulation); a subset of genes (ca 600 under a stringent cut-off), however, display an H1-dependent  
1117 control possibly involving transcriptional regulators directly influenced by H1.

## 1118 **Supplemental figure legends**

1119 **Figure 1 – figure supplement 1. Chromocenter formation relies on H1.1 and H1.2 but not H1.3 in**  
1120 **differentiated, adult tissues.**

1121 (A) wt and *h1.1h1.2* nuclei immunostained against centromeric regions with 180bp (centromeric) and  
1122 F28D6 (pericentromeric) probes and counterstained with DAPI. (B) Cytogenetic analyses in root nuclei  
1123 from triple *h1.1h1.2h1.3* (*3h1*), double *h1.1h1.2* (*2h1*), and triple *3h1* mutants complemented with  
1124 either H1.1 (*3h1;H1.1-RFP*) or H1.2 (*3h1; H1.2-GFP*) vs wild-type (wt). (C) Relative heterochromatin  
1125 fraction (RHF) in root nuclei is fully or partially restored upon complementation of *3h1* mutant. T-test,  
1126 error bars, standard error of the mean (s.e.m).

1127 **Figure 1 – figure supplement 2. H1 regulates chromatin-state dependent nucleosomal distribution.**

1128 Nucleosome occupancy per chromatin state (CS) schematically as described by Sequeira-Mendes et al.  
1129 (Sequeira-Mendes, Araguez et al. 2014) and represented along the most representative genomic feature  
1130 of each CS as proposed by Vergara and Gutierrez (Vergara and Gutierrez 2017).

1131 **Figure 1 – figure supplement 3. Super families of TEs upregulated in *3h1* mutant.**

1132 (A) The pie charts are based on the data from Table S2. Upregulated elements represent only 1.5% of  
1133 the TEs, are enriched in Helitron, Copia and Gypsy elements. (B) Distribution map of upregulated TEs in  
1134 *3h1* showing mostly pericentromeric elements. The bars represent single elements, color coded for the  
1135 fold change expression in *3h1*. The peak-and-valley profiles below each chromosome displays the  
1136 relative enrichment in genes (orange) and TEs (blue). Graph computed in R.

1137

1138 **Figure 2 – figure supplement 1. H1-depletion induces spatial dispersion of structural chromatin**  
1139 **domains at the nanoscale level.**

1140 (A) Typical TEM image of wild-type (wt) and triple mutant (*3h1*) nuclei (root epidermis) as shown in  
1141 Figure 2 together with a series of representative regions of interest (ROIs) in euchromatin used for  
1142 spatial autocorrelation function (ACF) analyses. Scale Bar: 500nm. (B) Replicate experiment (TEM sample  
1143 preparation, imaging and autocorrelation analysis) including a *3h1* mutant line complemented by H1.1-  
1144 GFP (*3h1comp*) and showing the restoration of a wild-type level of the dispersion (*D*) of length scales in  
1145 euchromatin. (C) The dispersion of nanoscale chromatin domains measured in TEM micrographs is  
1146 confirmed on super resolution images (GSD imaging) of immunolabelled H3. Analysis as in Figure 2.  
1147 Inset: ROI as used for ACF analysis.

1148 **Figure 2 – figure supplement 2. Chromatin mobility in meristematic nuclei is not affected by H1**  
1149 **depletion.**

1150 Fluorescence recovery after photobleaching (FRAP) in meristematic root nuclei in wt and *3h1* mutant  
1151 (graph, double normalisation, as done for Figure 2. see Methods). H1 depletion does not alter chromatin  
1152 mobility in meristematic nuclei. Note that the recovery rate of H1-depleted differentiated nuclei (Figure  
1153 2) is similar to that of wt meristematic nuclei.

1154 **Figure 3 – figure supplement 1. Gene expression in *3h1* mutant.**

1155 Volcano plot showing significance of gene expression changes in *3h1* vs wt and preferences to up-  
1156 regulation in *3h1*. This plot is the full version as the one presented Figure 3 (cropped around the dashed  
1157 box for display purposes).

1158 **Figure 3 – figure supplement 2. Up- and down- regulated genes in *3h1* correspond to gene categories**  
1159 **with distinct expression strength in wild-type.**

1160 The graphs shows the mean expression level in RNAseq profiles for the classes of genes up- or down-  
1161 regulated in *3h1*, or unaffected. The graph shows a clear cut trend in gene classes with respect to their  
1162 original expression strength in wild-type: *3h1* down-regulated genes represent a class of normally highly  
1163 expressed genes in wild-type compared to the class of *3h1* up-regulated genes that represent a class of  
1164 genes with low expression levels in wild-type. Average gene expression (RPKM) from 3 biological  
1165 replicates for each group of genes: down-regulated in *3h1* (N=43), not-regulated in *3h1* (N=22557) and  
1166 up-regulated in *3h1* (N=231); p-value  $\leq 0.01$  and fold change  $\geq 1.5$ .

1167 **Figure 3 – figure supplement 3. Distribution of chromatin states (CS) of all genes in the *Arabidopsis***  
1168 ***thaliana* genome versus genes upregulated in *3h1* plants.**

1169 Among 1095 genes which were up-regulated in *3h1* plants (p-value  $\leq$  0.05 and fold change  $\geq$  1.5), 142  
1170 are TE genes and 12 are pseudogenes what might explain the slight overrepresentation of CS9. CS6 is  
1171 also slightly more represented among upregulated genes but otherwise there is no specific category.

1172 **Figure 3 – figure supplement 4. The overall distribution of CHH and CG is not affected in *3h1* mutant**  
1173 **nuclei.**

1174 Confocal imaging of root nuclei in 8 days old seedlings expressing the DynaMET reporters marking  
1175 methylated DNA in the CG or CHH context as indicated (Ingouff et al, 2017).

1176 **Figure 3 – figure supplement 5. H3, H3K4me2 and H3K27me2 are not affected by H1 depletion.**

1177 Leaf nuclei isolated, flow-sorted according to their 2C DNA content, spread and immunostained as  
1178 described in the methods. H1 immunostaining was used as control.

1179 **Figure 3 – figure supplement 6. Global levels of H3K27me3 are reduced in *3h1* seedlings.**

1180 Forty micrograms of chromatin extracts from 8-day-old plants of the different genotypes were analyzed  
1181 by immunoblot using the indicated antibodies. A dilution series of wild-type plant extracts serves as a  
1182 quantitative estimation.

1183

1184 **Figure 4 – figure supplement 1. Flowering time for *h1* mutants and complemented lines.**

1185 **(A)** Leaf number at bolting (~0.5 cm stem) was monitored for different variant combinations of H1  
1186 mutants under long day conditions (16h day/8 h night). **(B)** Comparison between wt, triple *h1.1h1.2h1.3*  
1187 (*3h1*) and three different double *h1.1h1.2*, *h1.1h1.3*, *h1.2h1.3* mutants. **(C)** Introducing one or two main

1188 H1 variants into *3h1* background does not complement early flowering phenotype. **(D)** Early flowering  
1189 phenotype in *3h1* was complemented by introducing all three H1 variants (*3h1;H1*).

1190 *Legend: 3h1/H1.1 - 3h1;prom.H1.1:H1.1-RFP; 3h1/H1.2 - 3h1;prom.H1.2::H1.2-GFP; 3h1/H1.1/H1.2 -*  
1191 *3h1;prom.H1.1:H1.1-RFP /prom.H1.2::H1.2-GFP; 3h1;H1 - 3h1;prom.H1.1:H1.1-RFP /prom.H1.2::H1.2-*  
1192 *CFP/prom.H1.3::H1.3-GFP; #1, #2, #3 mean different, independent Arabidopsis lines.*

1193 **Figure 4 – figure supplement 2. H1 is required for correct developmental transitions.**

1194 This figure shows additional image and quantification material supporting Figure 4

1195 **(A)** Typical seedling phenotypes in *3h1*, *3h1* complemented lines and wt showing differences in lateral  
1196 root number **(B)** Altered stomata spacing in *3h1* cotyledons (15 days after germination, adaxial side). **(C)**  
1197 Relative proportion of primary, secondary, tertiary and quaternary stomatal complexes presented in  
1198 panel B. **(D)** Multicellular root hairs in *3h1* mutant showing ectopic nuclei (DAPI staining, red).  
1199 Multicellular root hairs were rare in *3h1* (<1% root hairs observed among 3x 24 seedlings) but never  
1200 observed in wild-type among 3 independent experiments (24 three weeks old seedlings/experiment  
1201 grown on MS complemented with 1% sugar)

1202 *Legend: 3h1, triple mutant h1.1;h1.2;h1.3. 3h1;H1, triple mutant complemented with the three H1*  
1203 *variants tagged with FPs: 3h1;prom.H1.1:H1.1-RFP; prom.H1.2::H1.2-CFP; prom.H1.3::H1.3-GFP.*

1204 **Figure 4 – figure supplement 3. Callus formation efficiency in H1 deficient mutants is reduced.**

1205 **(A)** Comparison between callus formation in wt, *3h1* and *h1.3*. **(B)** Callus area was measured for wt, *3h1*  
1206 and *h1.3* with ImageJ.

1207 **Figure 4 – Figure supplement 4. H1.2 levels decrease relative to H1.1 during cellular differentiation in**  
1208 **root.**

1209 **(A)** Snapshot (single plane, CSLM imaging) of a root tip co-expressing H1.1-RFP and H1.2 GFP (as  
1210 indicated) in the *3h1* background overlaid with the DIC channel (right). **(B)**. Representative nuclei series  
1211 from a single root tip from the meristematic zone to the differentiation zone (3D projection of CSLM  
1212 series).

### 1213 **Supplemental tables**

1214 **Supplemental Table 1.** Transposable element (TE) expression in *3h1*. *Available as an Excel table.*

1215 **Supplemental Table 2.** Classes of TEs up-regulated in *3h1*.

1216 **Supplemental Table 3.** Gene expression in *3h1*. *Available as an Excel table.*

1217 **Supplemental Table 4.** Gene Ontology (GO) analysis of genes which are misregulated in *3h1* mutant.

1218 **Supplemental Table 5.** Expression of histone modifying enzymes in *3h1*.



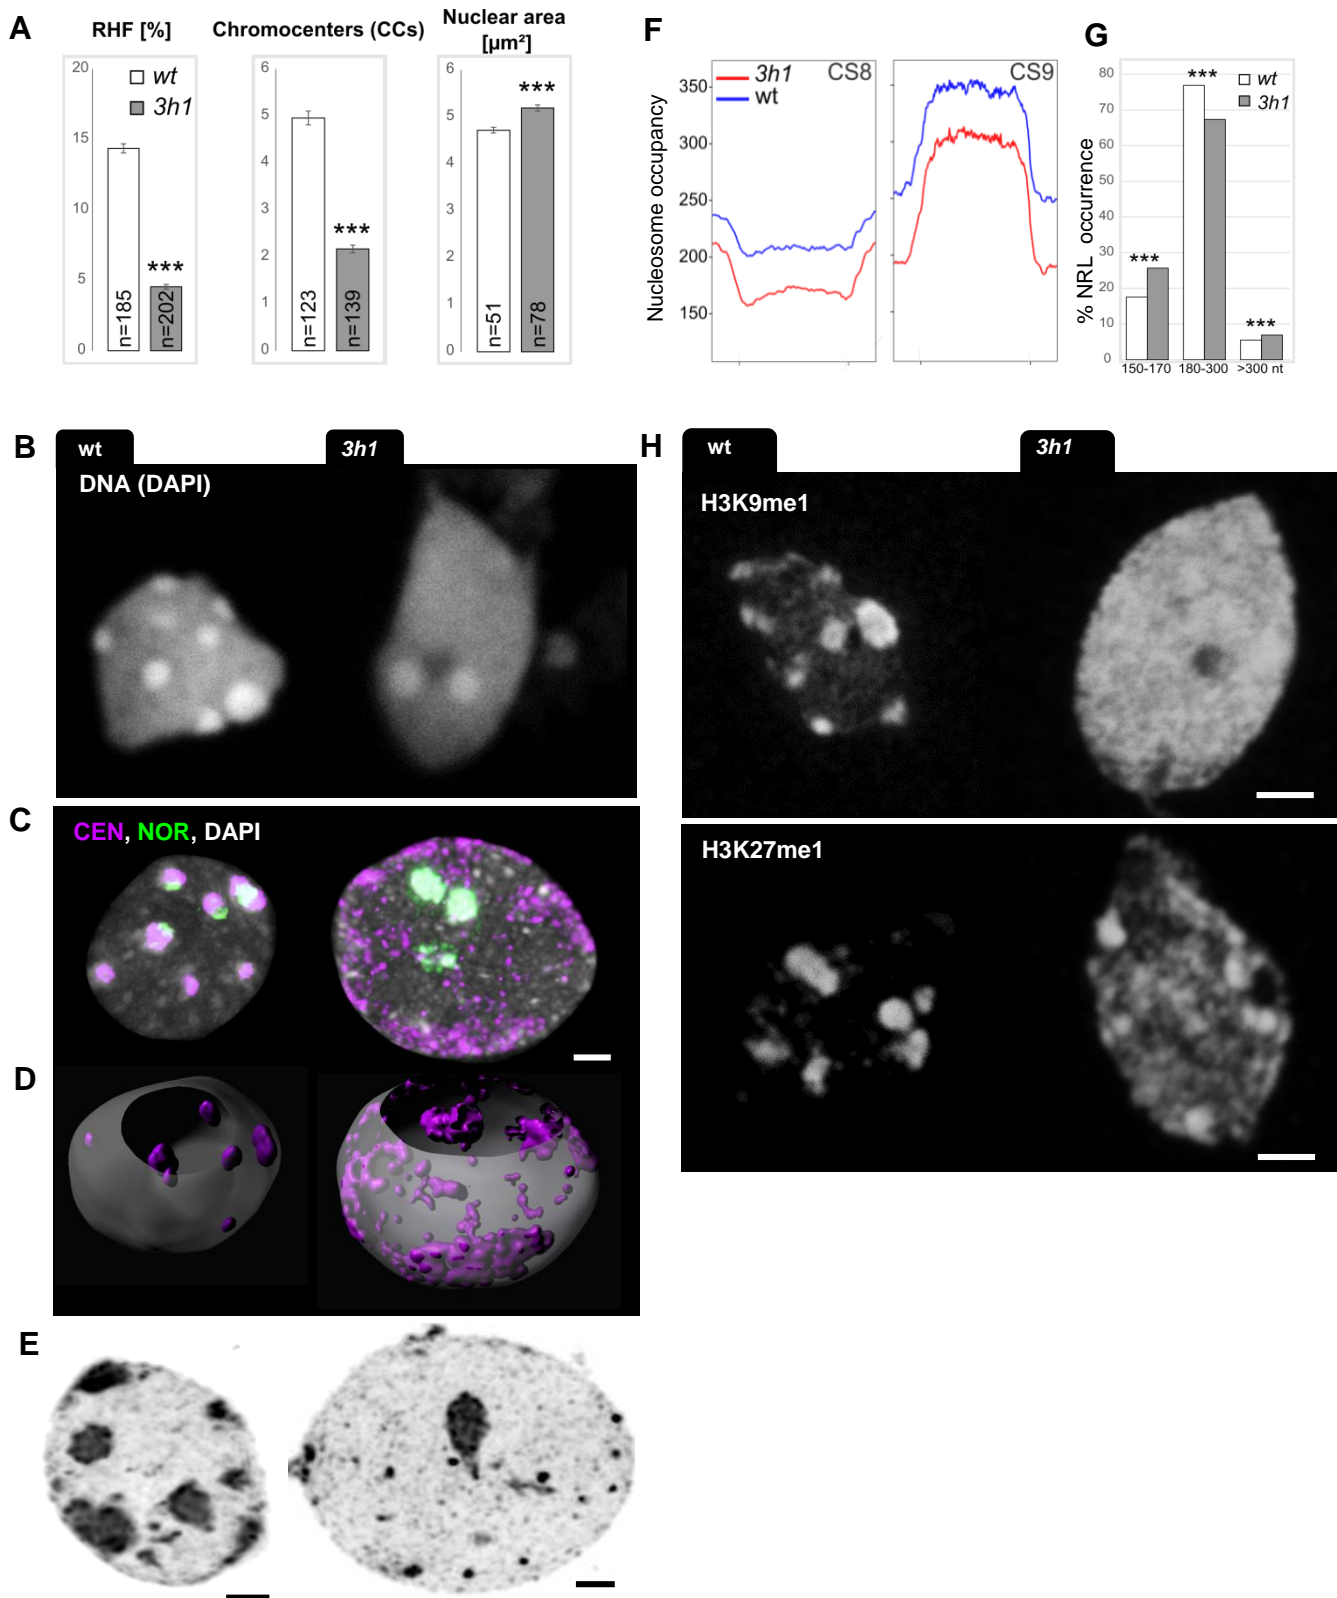

Figure 1

### Figure 1 – figure supplement 1

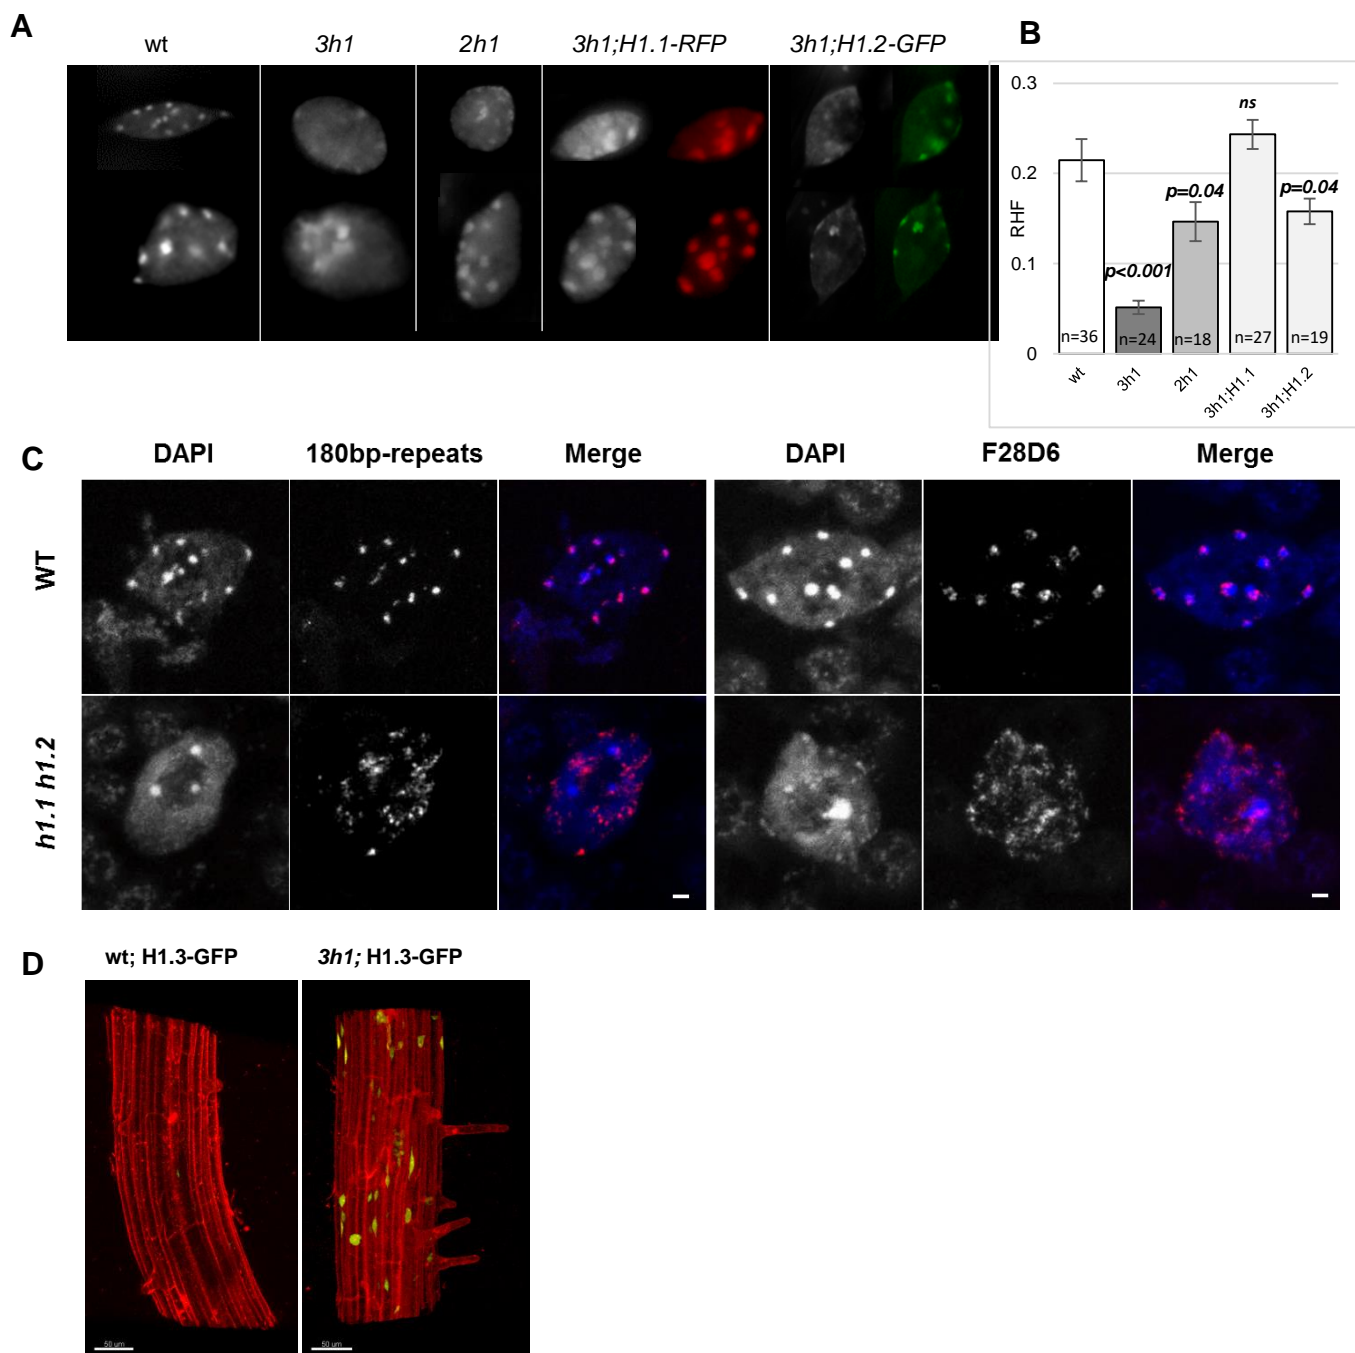

Figure 1 – figure supplement 2

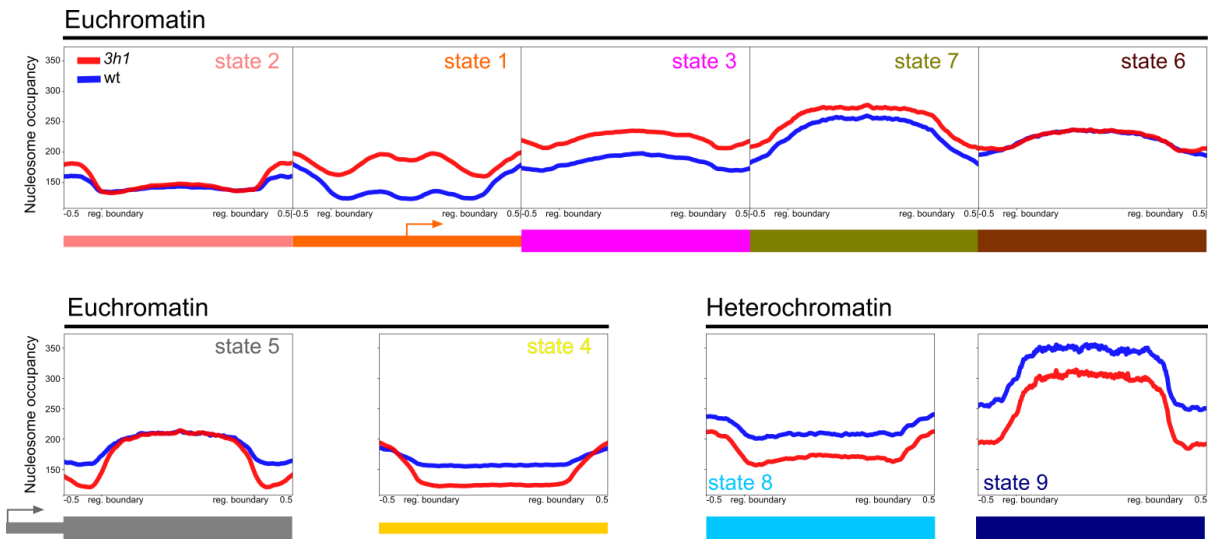

**Figure 1 – figure supplement 3**

**A**

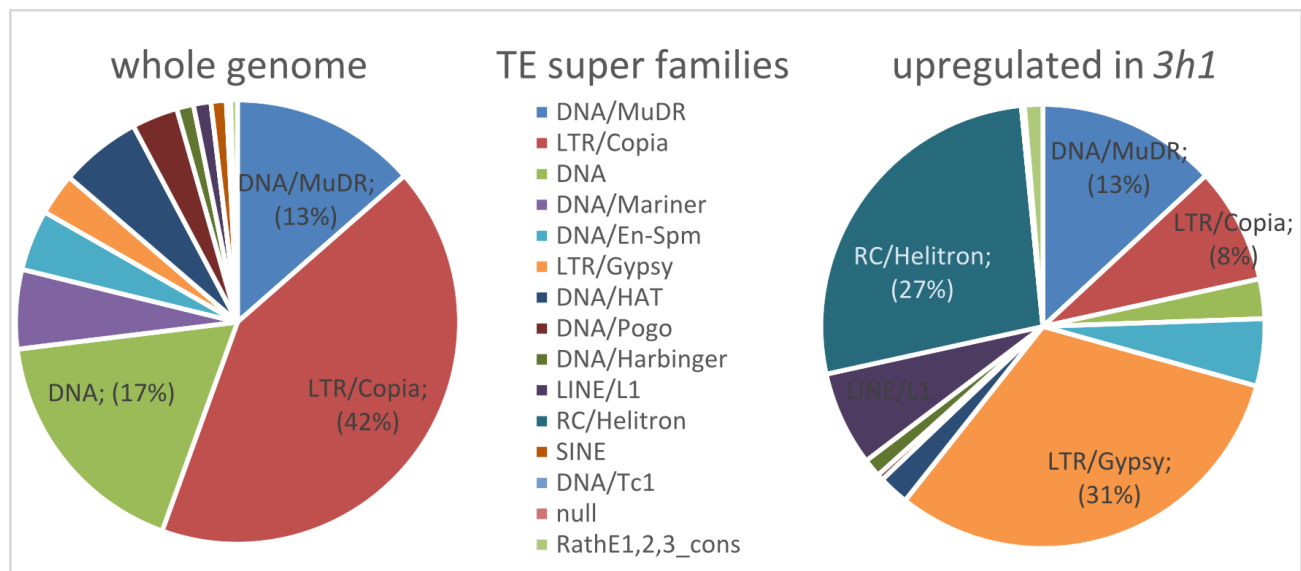

**B**

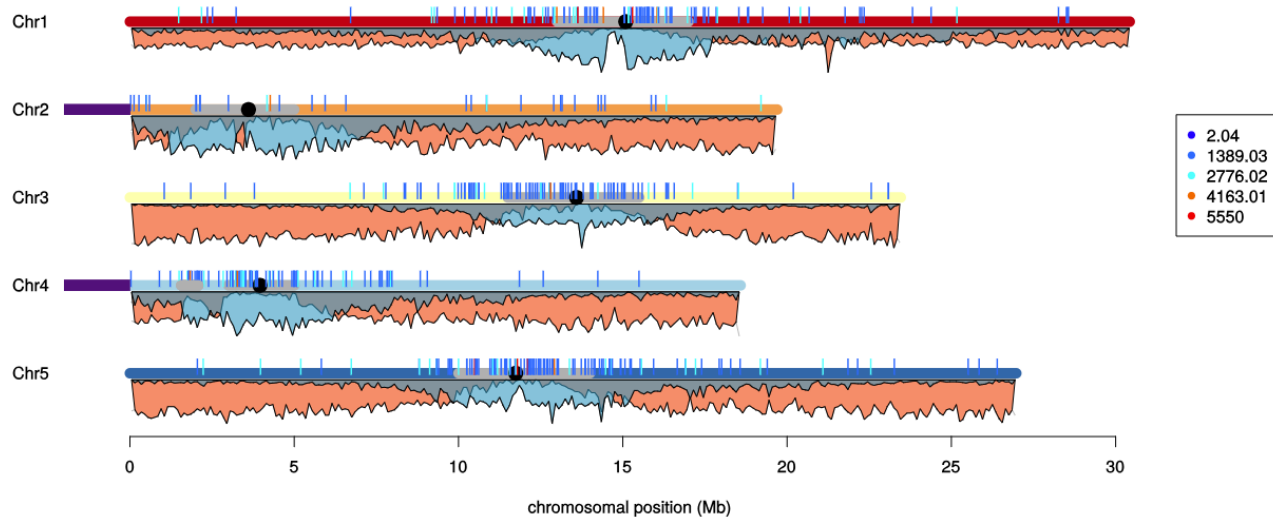

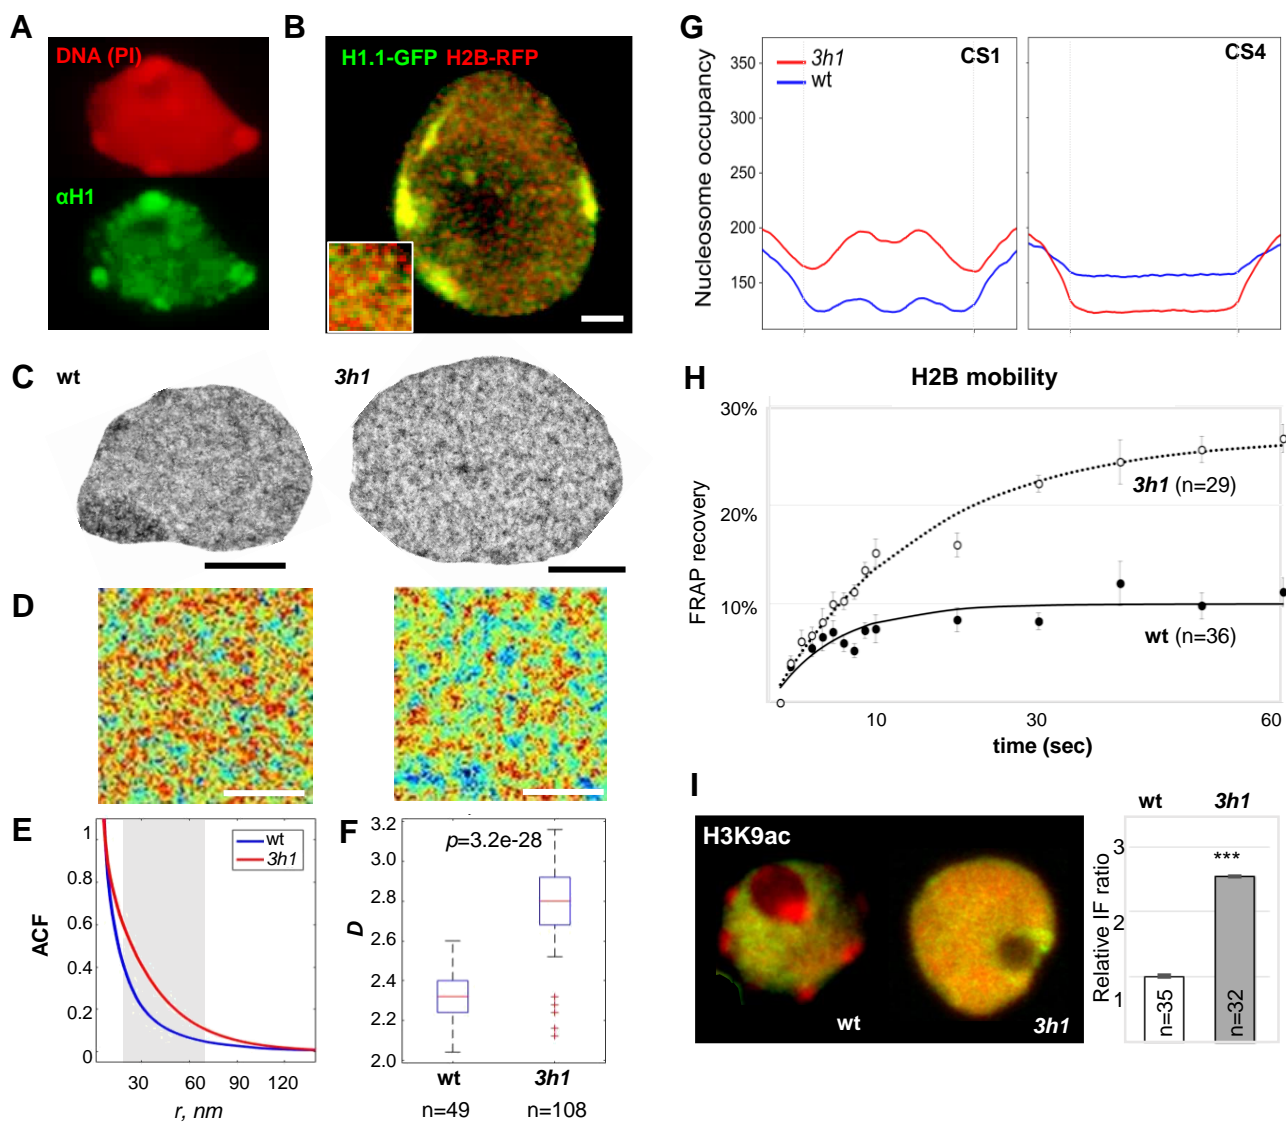

Figure 2

### Figure 2 – figure supplement 1

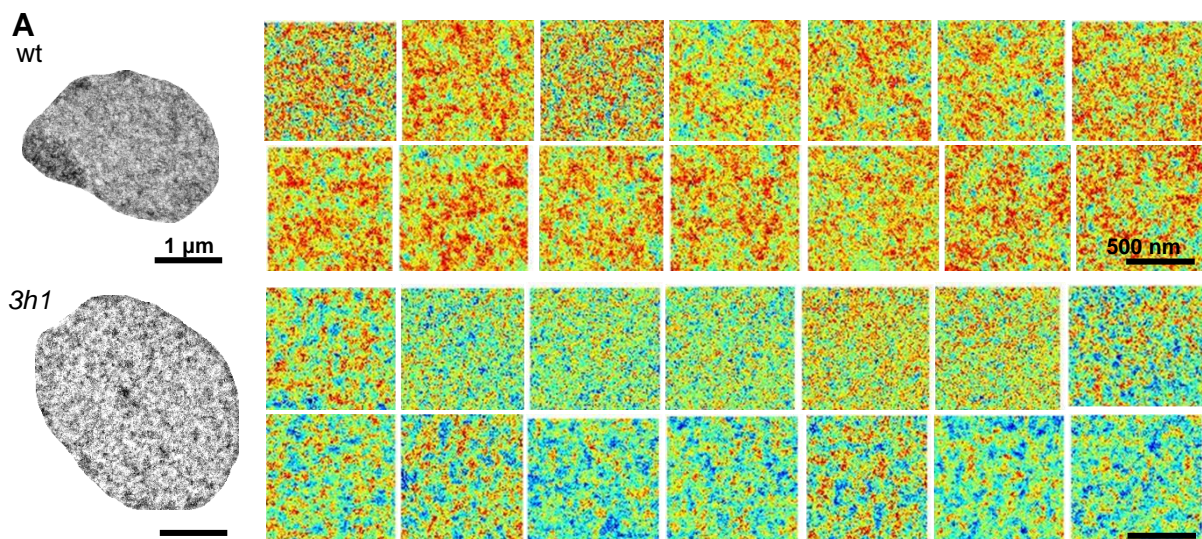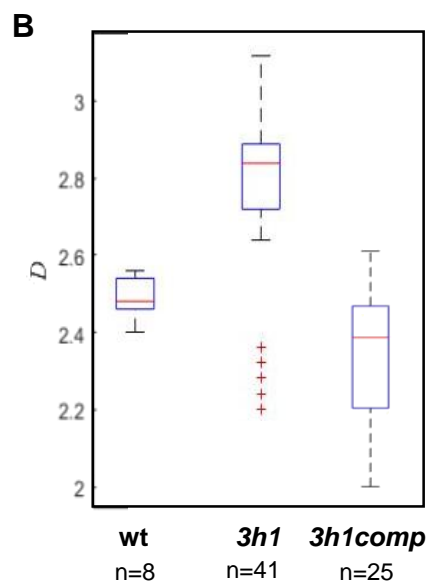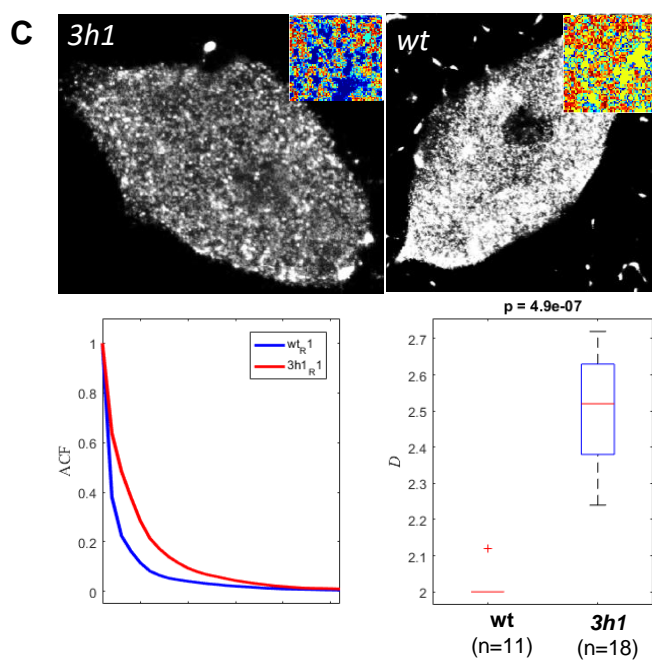

Figure 2 – figure supplement 2

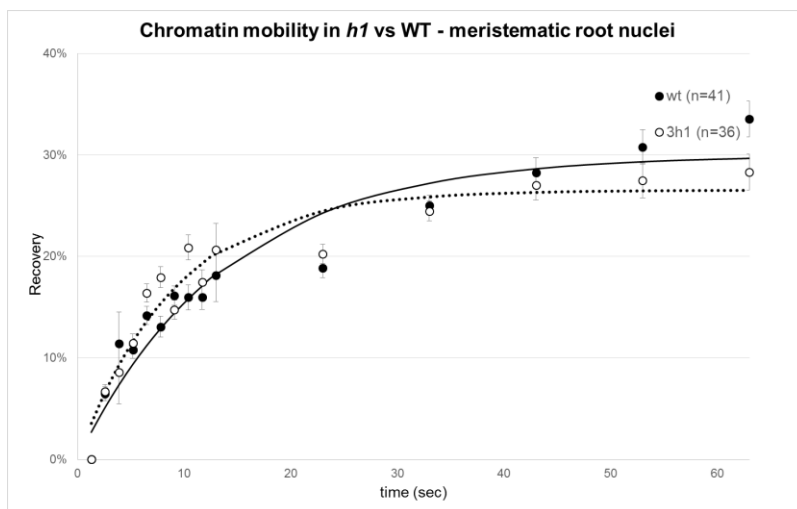

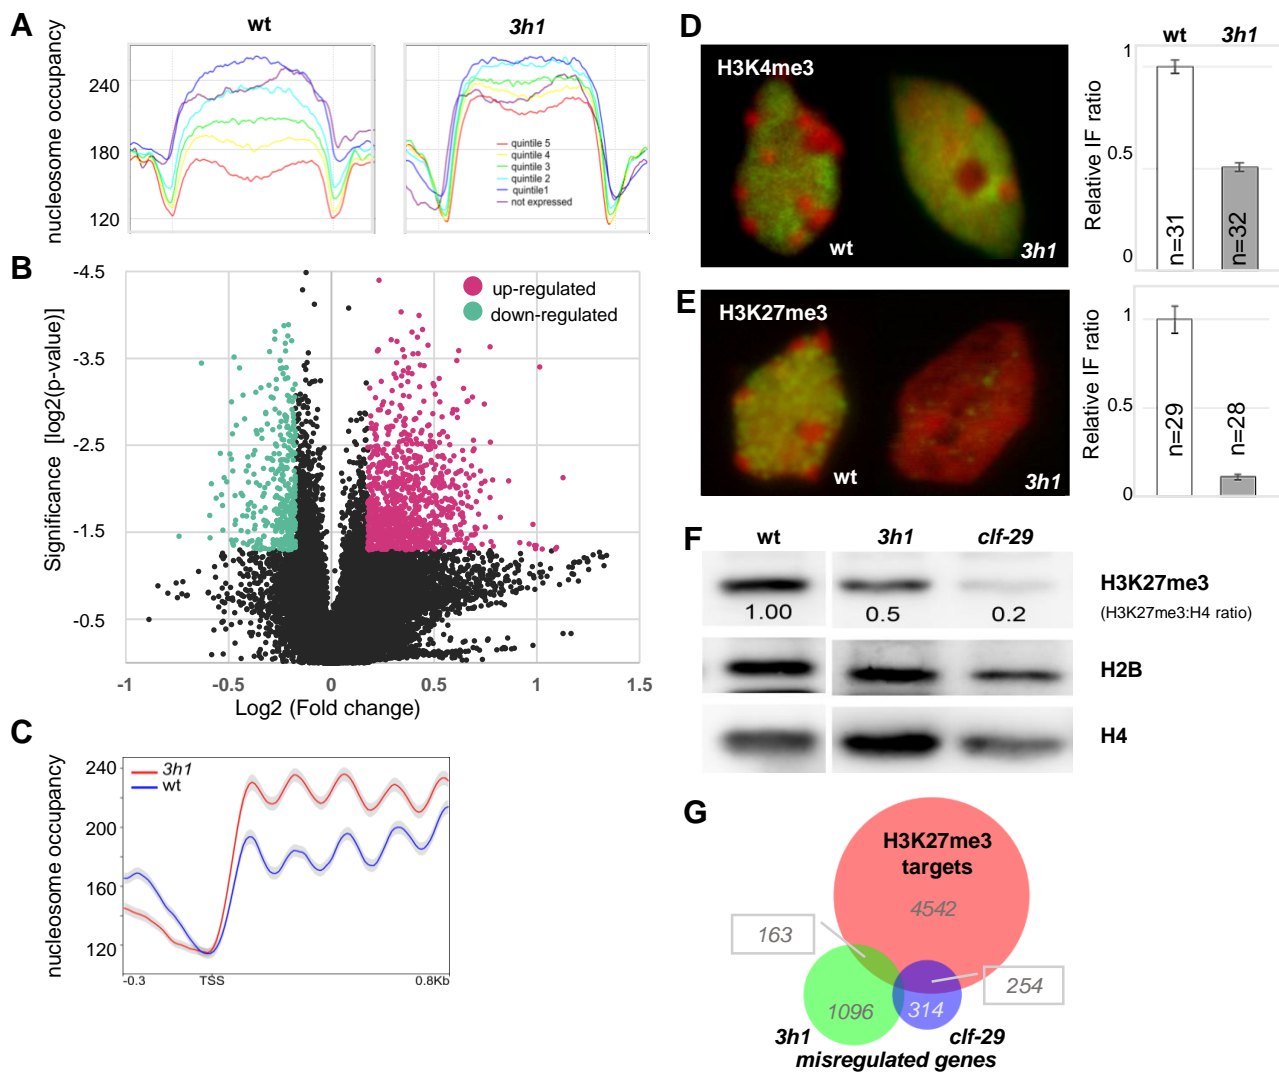

Figure 3



Figure 3 – figure supplement 1

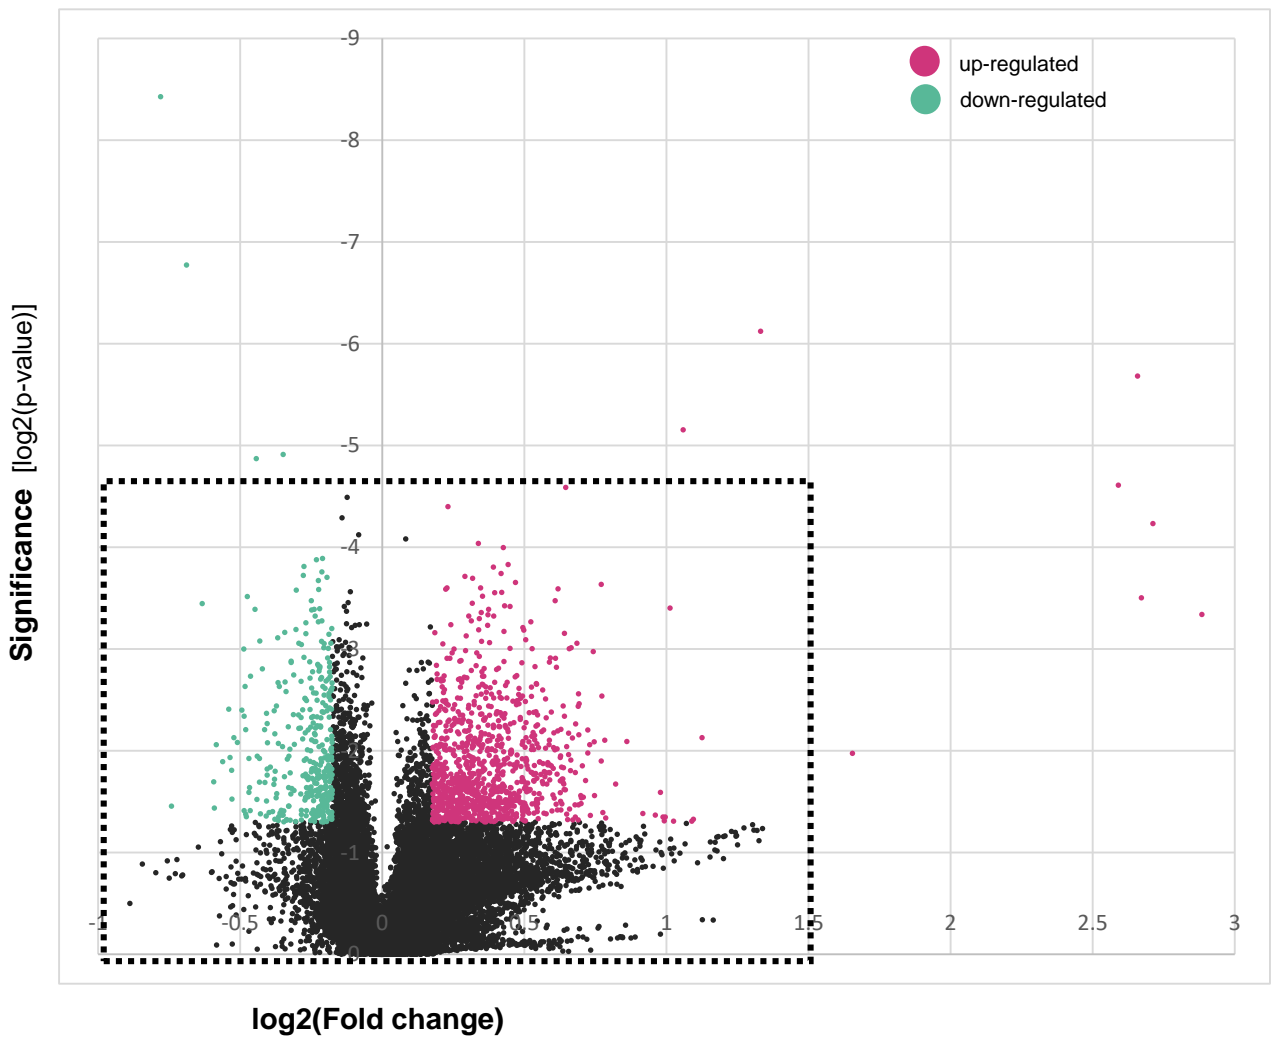

**Figure 3 – figure supplement 2**

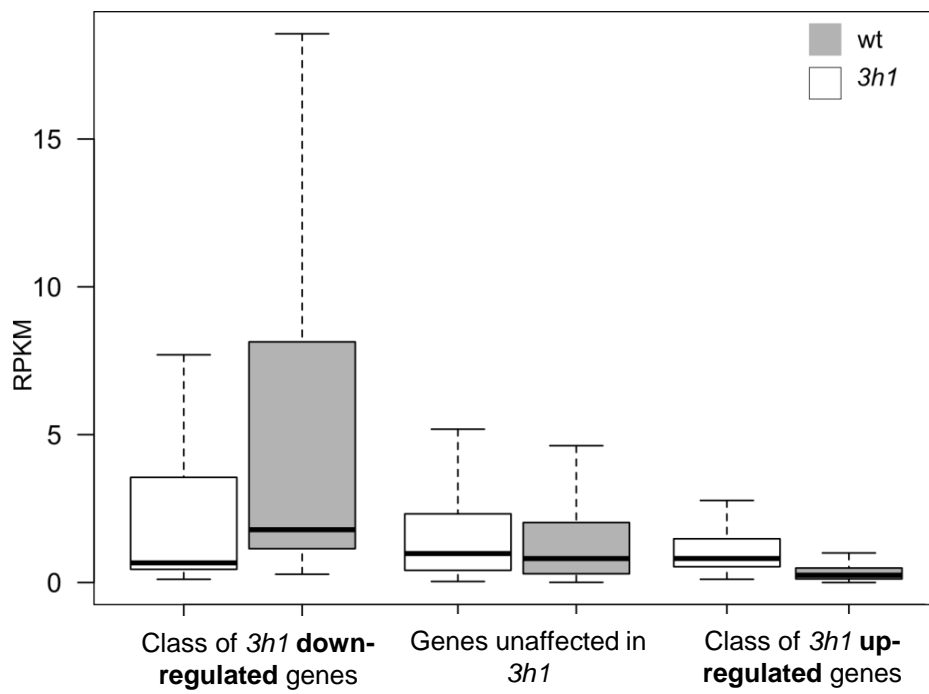

**Figure 3 – figure supplement 3**

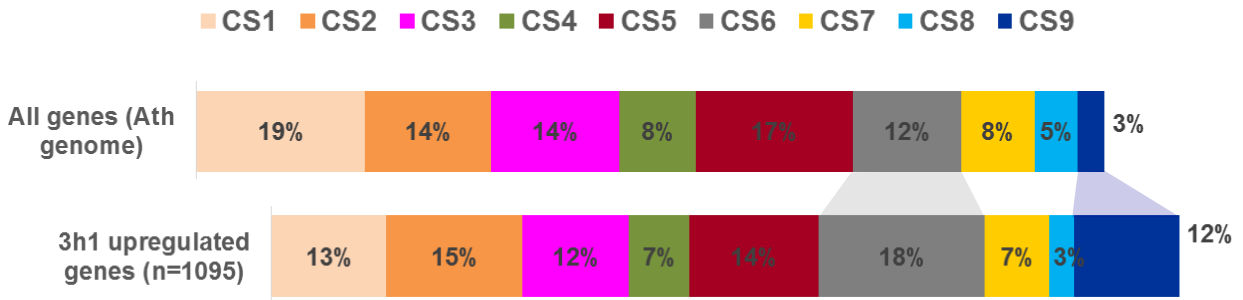

Figure 3 – figure supplement 4

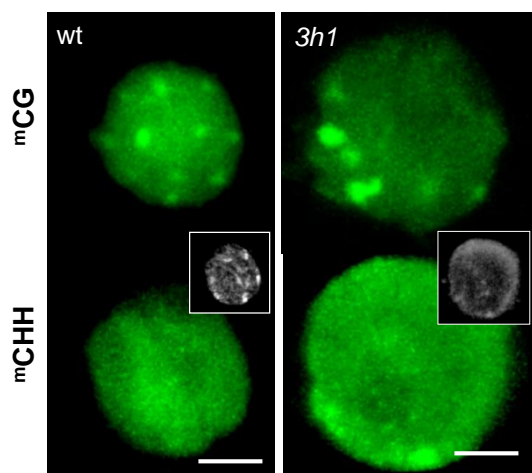

Figure 3 – figure supplement 5

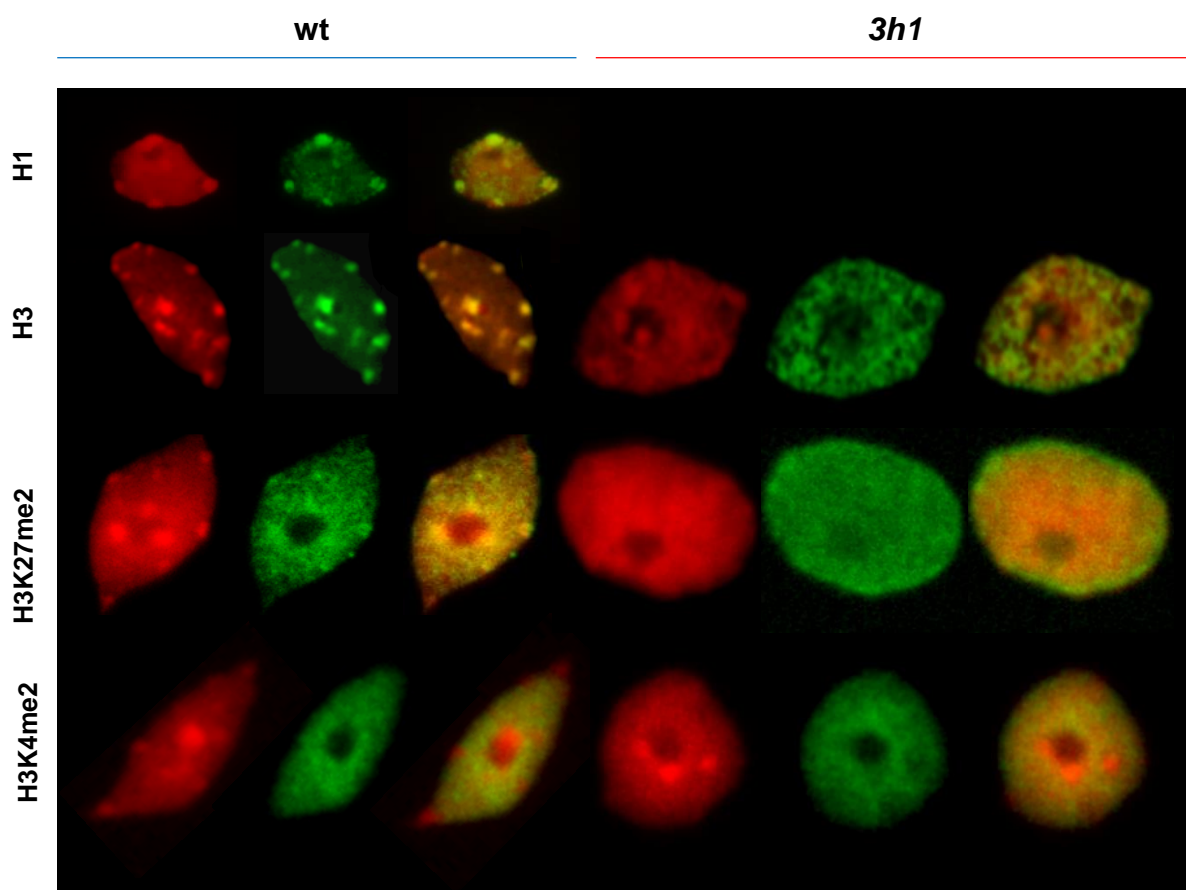

Figure 3 – figure supplement 6

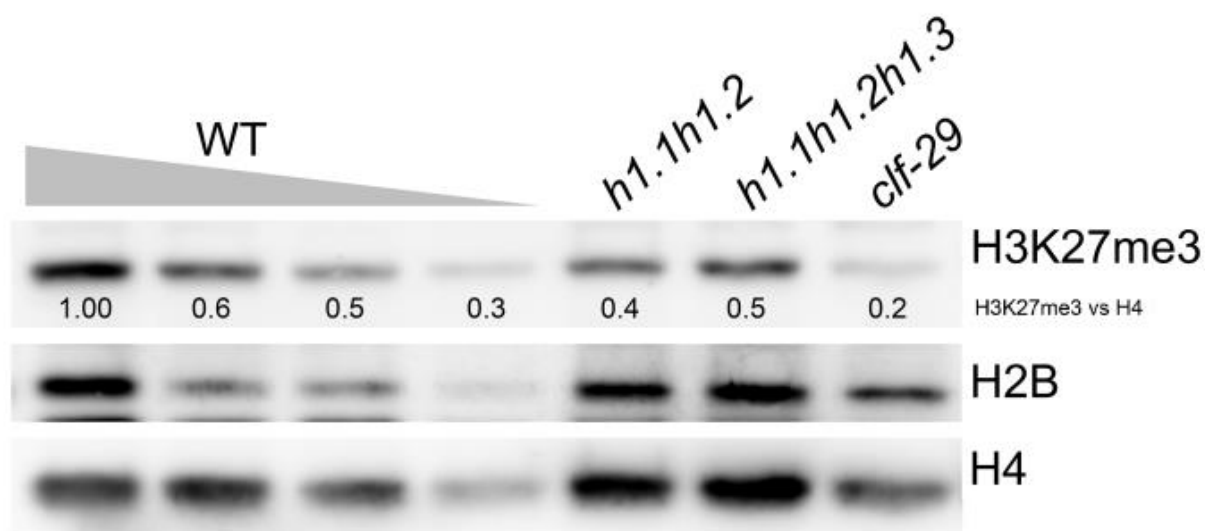

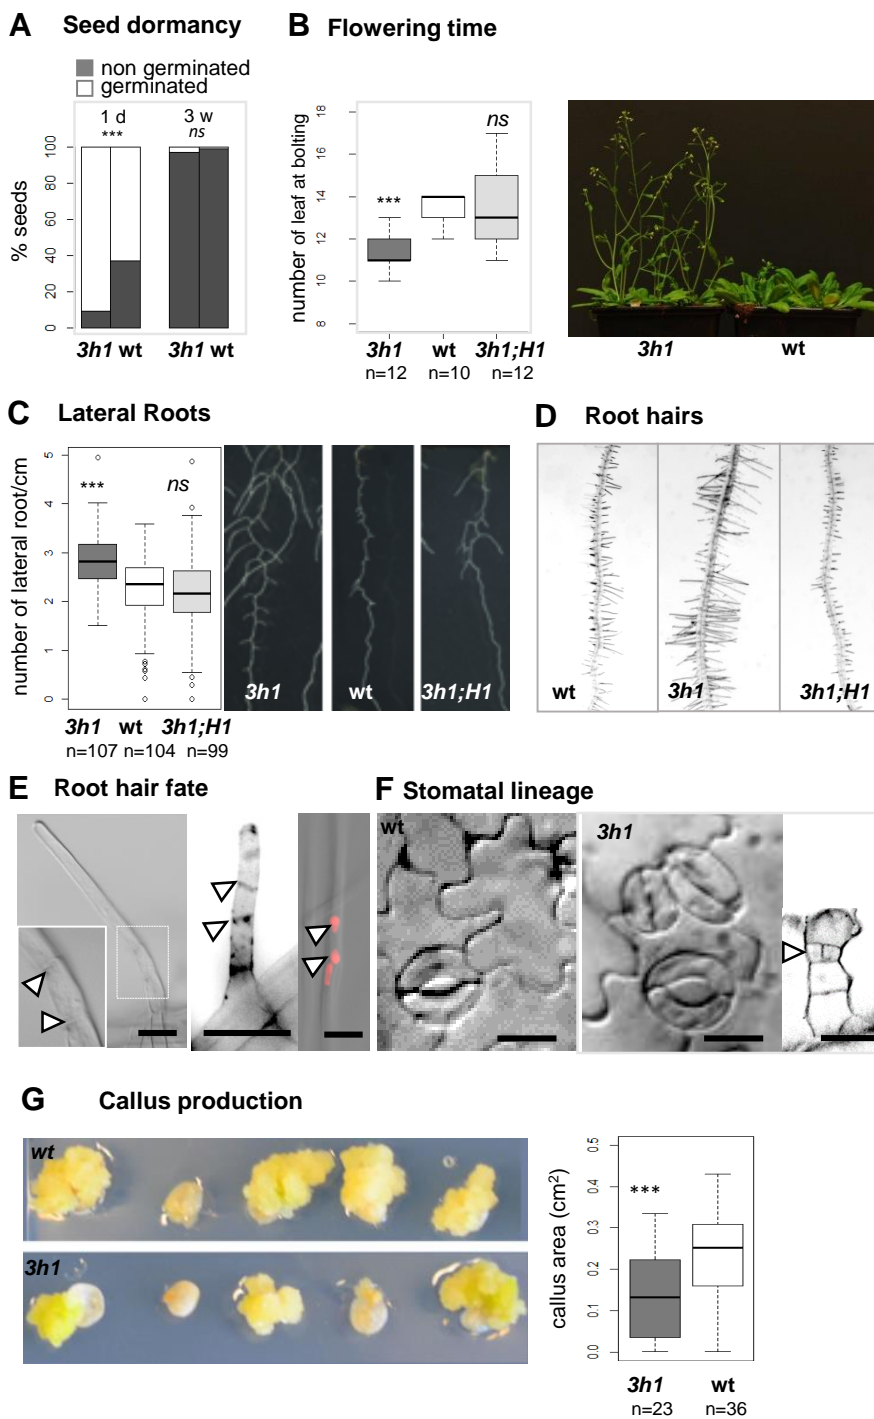

Figure 4

**Figure 4 – figure supplement 1**

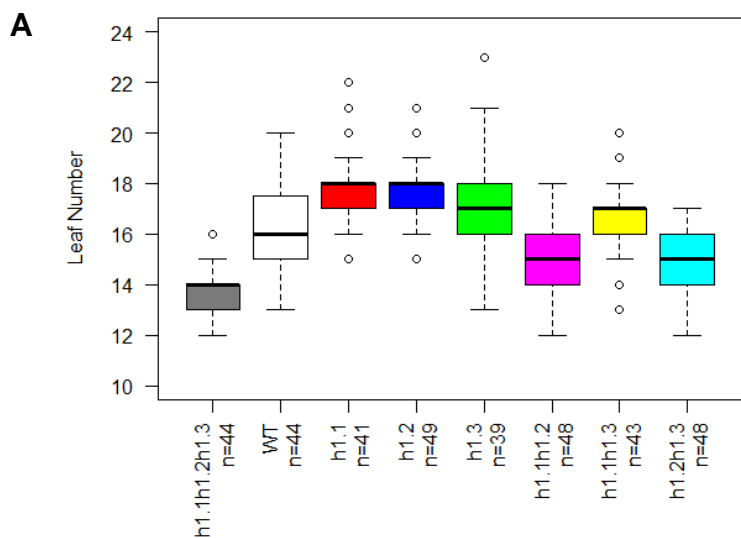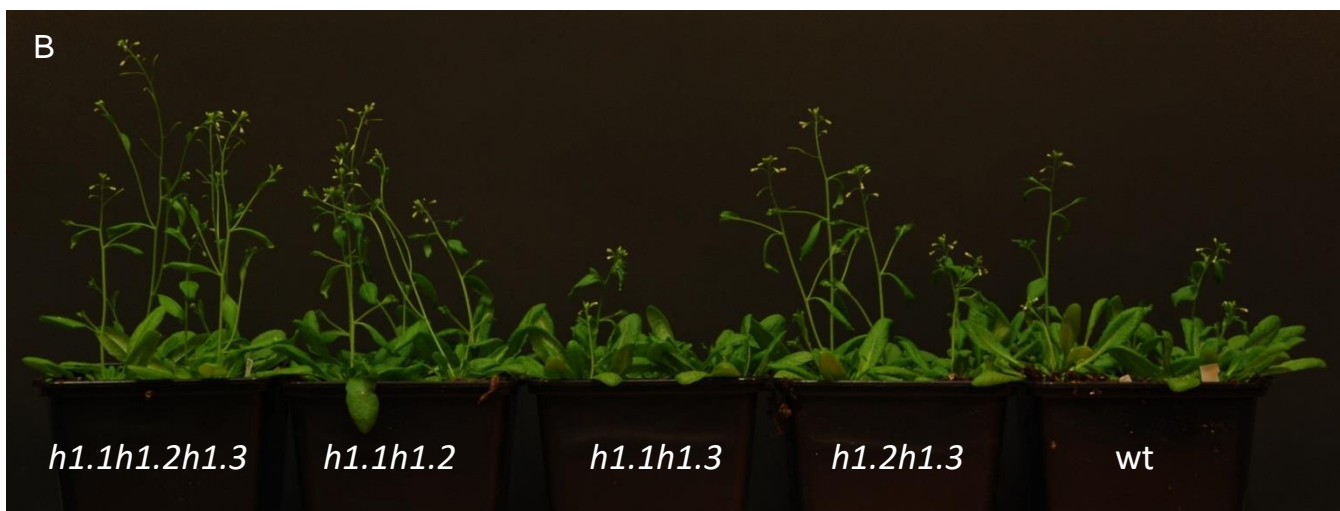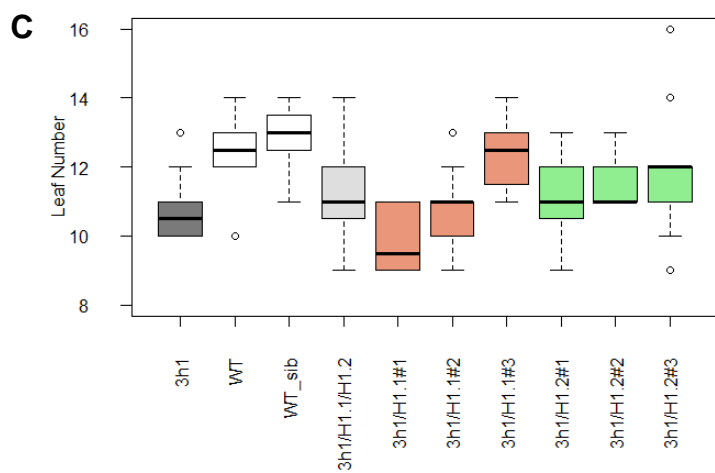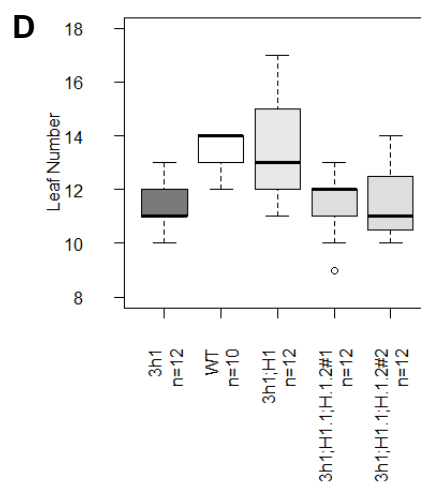



## Figure 4 – figure supplement 2

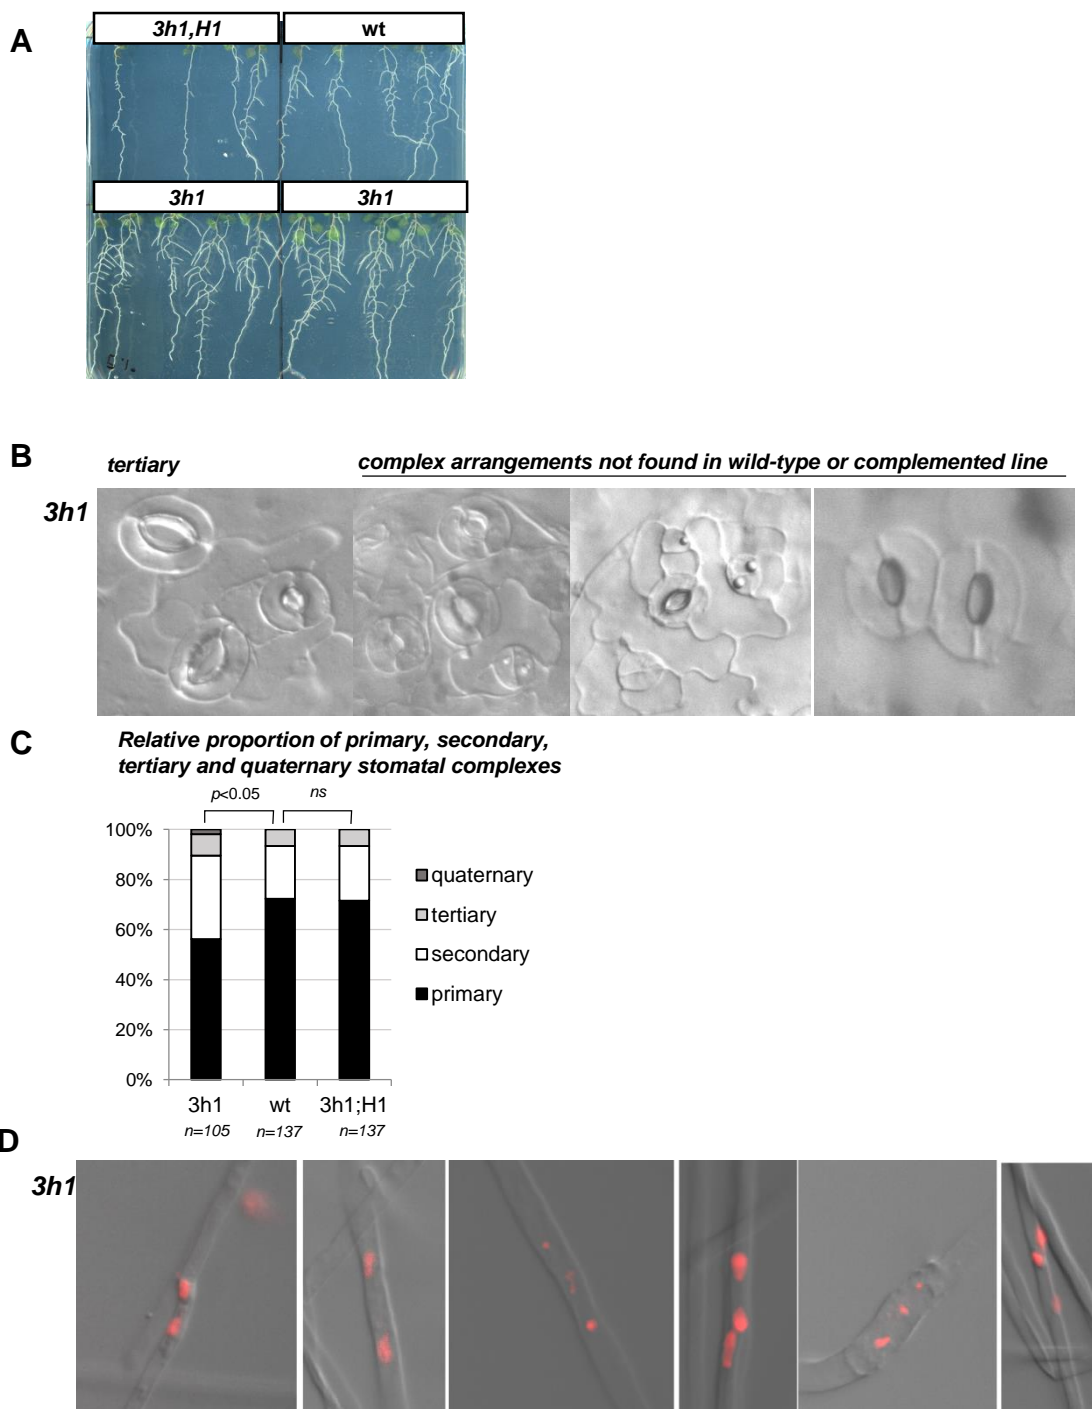

**Figure 4 – figure supplement 3**

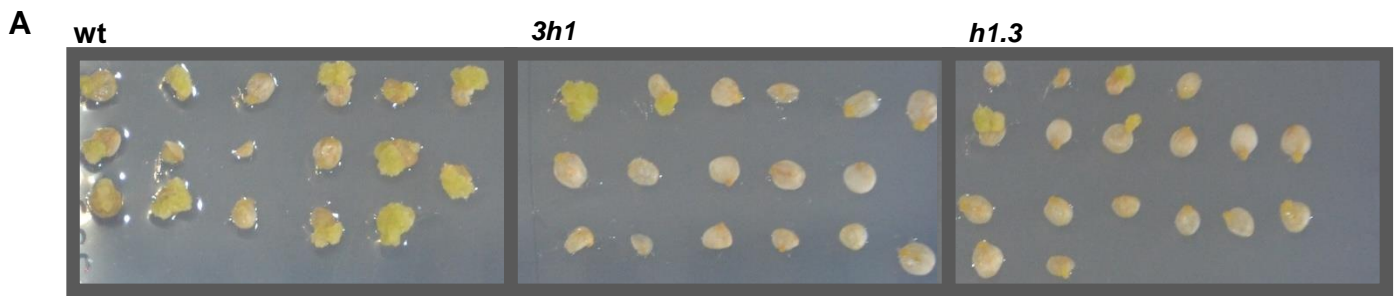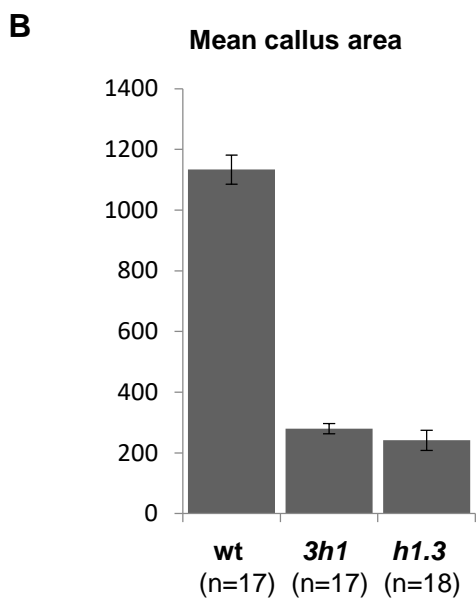

Figure 4 – figure supplement 4

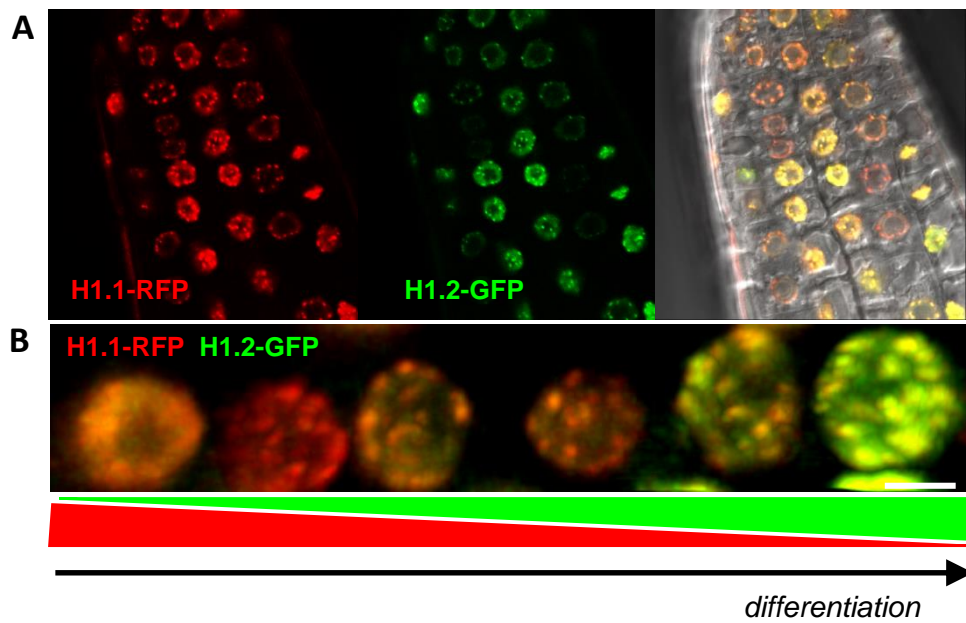

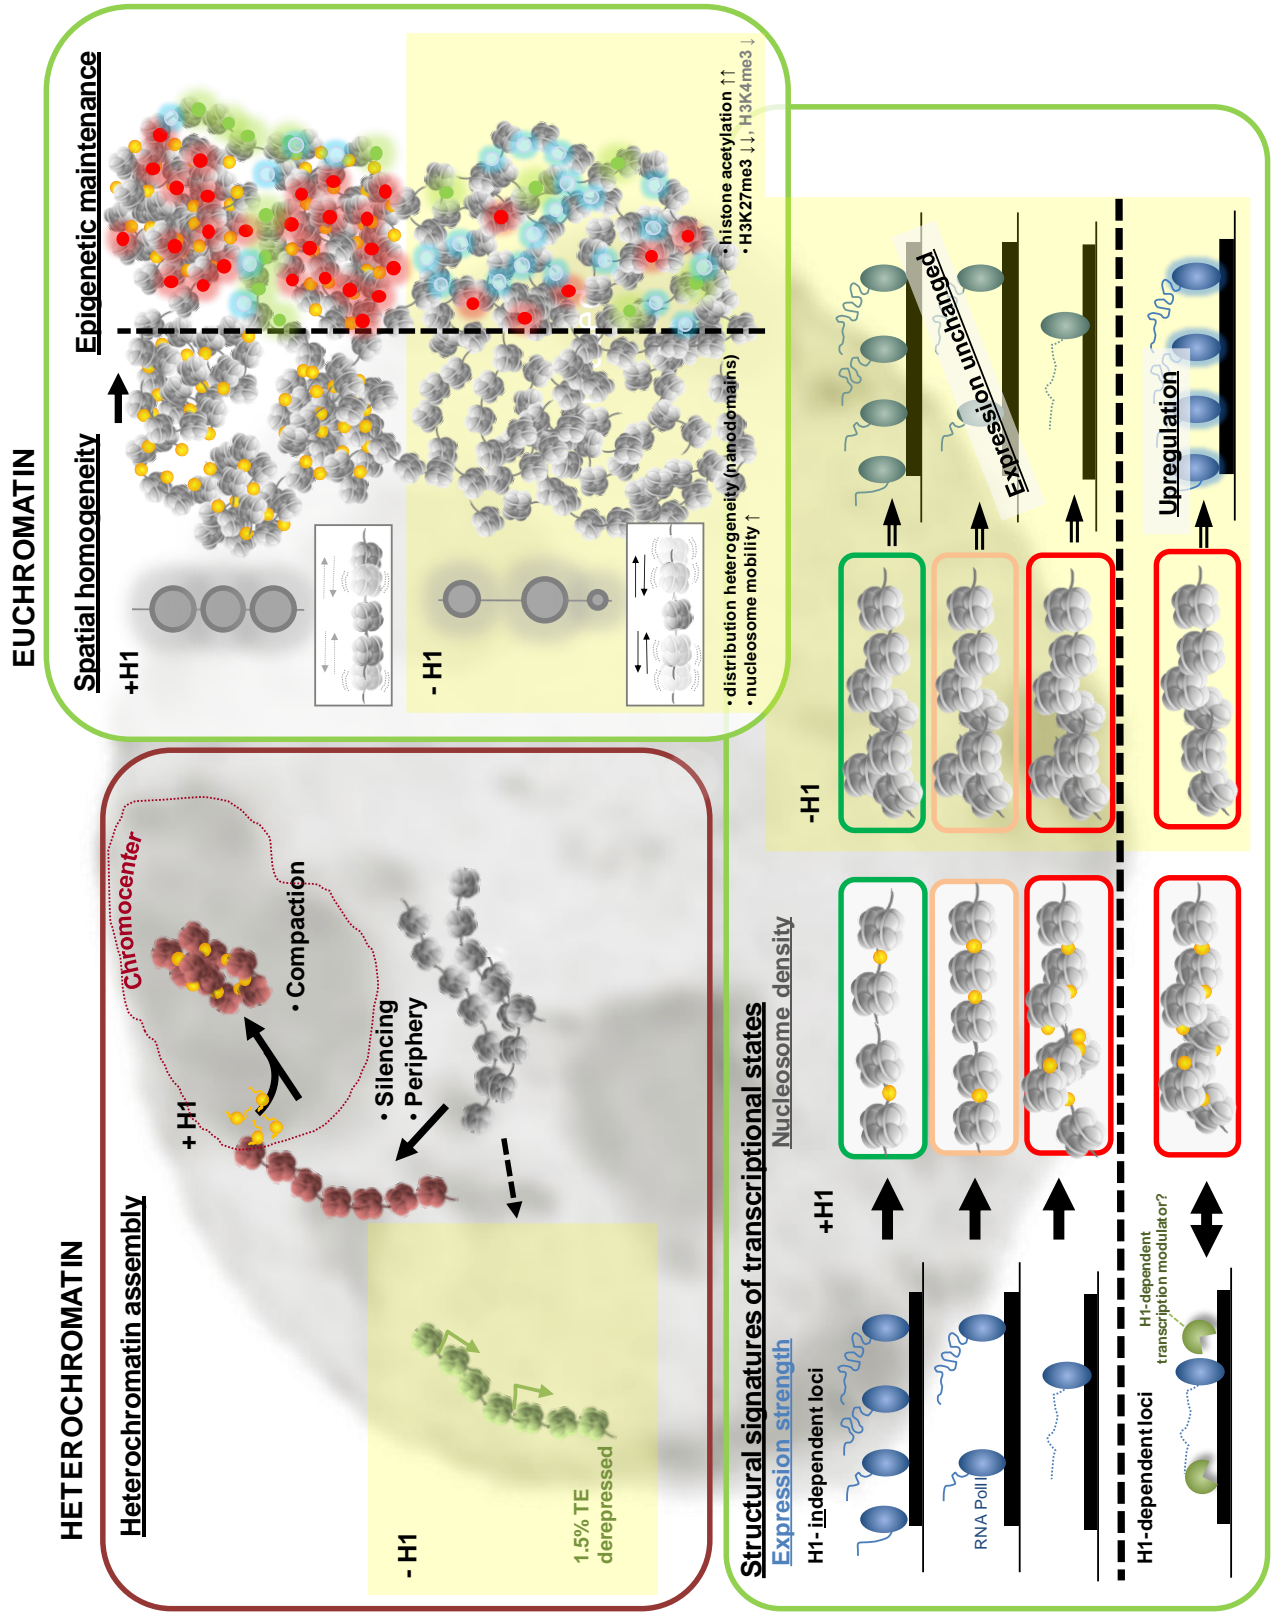

Figure 5

**Supplemental Table 2. Classes of TEs up-regulated in *3h1*.**

| <b>Super Family</b> | <b>Whole genome<br/>number of TE (%)</b> | <b>Upregulated in <i>3h1</i> (Fch<math>\geq</math>2, P<math>\leq</math>0.05)<br/>number of TE (%)</b> |
|---------------------|------------------------------------------|-------------------------------------------------------------------------------------------------------|
| DNA/MuDR            | 5410 (13%)                               | 59 (13%)                                                                                              |
| LTR/Copia           | 1781 (42%)                               | 38 (8%)                                                                                               |
| DNA                 | 1829 (17%)                               | 13 (3%)                                                                                               |
| DNA/Mariner         | 151 (6%)                                 | 0 (0%)                                                                                                |
| DNA/En-Spm          | 941 (4%)                                 | 22 (5%)                                                                                               |
| LTR/Gypsy           | 4181 (3%)                                | 141 (31%)                                                                                             |
| DNA/HAT             | 1035 (6%)                                | 10 (2%)                                                                                               |
| DNA/Pogo            | 344 (3%)                                 | 2 (0%)                                                                                                |
| DNA/Harbinger       | 379 (1%)                                 | 6 (1%)                                                                                                |
| LINE/L1             | 1447 (1%)                                | 31 (7%)                                                                                               |
| RC/Helitron         | 12945 (0%)                               | 121 (27%)                                                                                             |
| SINE                | 131 (1%)                                 | 0 (0%)                                                                                                |
| DNA/Tc1             | 95 (0%)                                  | 0 (0%)                                                                                                |
| null                | 16 (0%)                                  | 1 (0%)                                                                                                |
| RathE1,2,3_cons     | 391 (0%)                                 | 6 (1%)                                                                                                |
| <b>All</b>          | <b>31076 (100%)</b>                      | <b>450 (100.0%)</b>                                                                                   |

**Supplemental Table S4. Gene Ontology (GO) analysis of genes which are misregulated in *3h1* mutant.**

| <b>Biological process</b>                          |                      |                |
|----------------------------------------------------|----------------------|----------------|
| <b>GO Term</b>                                     | <b>GO Annotation</b> | <b>p-value</b> |
| photosynthesis, light harvesting in photosystem I  | GO:0009768           | 5.59E-20       |
| photosynthesis                                     | GO:0015979           | 2.42E-17       |
| protein-chromophore linkage                        | GO:0018298           | 1.50E-16       |
| photosynthesis, light harvesting                   | GO:0009765           | 1.73E-16       |
| photosynthesis, light reaction                     | GO:0019684           | 7.89E-13       |
| generation of precursor metabolites and energy     | GO:0006091           | 5.51E-08       |
| response to light stimulus                         | GO:0009416           | 6.51E-08       |
| response to radiation                              | GO:0009314           | 1.62E-07       |
| response to abiotic stimulus                       | GO:0009628           | 5.20E-07       |
| chlorophyll biosynthetic process                   | GO:0015995           | 2.14222E-06    |
| porphyrin-containing compound biosynthetic process | GO:0006779           | 5.9281E-06     |
| tetrapyrrole biosynthetic process                  | GO:0033014           | 8.40871E-06    |
| response to far red light                          | GO:0010218           | 1.65334E-05    |
| chlorophyll metabolic process                      | GO:0015994           | 3.82708E-05    |
| response to red light                              | GO:0010114           | 4.06136E-05    |
| response to high light intensity                   | GO:0009644           | 0.000107761    |
| porphyrin-containing compound metabolic process    | GO:0006778           | 0.000114665    |
| tetrapyrrole metabolic process                     | GO:0033013           | 0.000119558    |
| response to blue light                             | GO:0009637           | 0.00021512     |
| response to light intensity                        | GO:0009642           | 0.000226407    |
| response to stimulus                               | GO:0050896           | 0.000376309    |
| response to red or far red light                   | GO:0009639           | 0.001070904    |
| response to low light intensity stimulus           | GO:0009645           | 0.005522224    |
| pigment biosynthetic process                       | GO:0046148           | 0.00574522     |
| protoporphyrinogen IX biosynthetic process         | GO:0006782           | 0.006858986    |
| protoporphyrinogen IX metabolic process            | GO:0046501           | 0.006858986    |
| response to chemical                               | GO:0042221           | 0.025952734    |
| pigment metabolic process                          | GO:0042440           | 0.026767756    |
| heme biosynthetic process                          | GO:0006783           | 0.04207751     |
| <b>Molecular function</b>                          |                      |                |
| <b>GO Term</b>                                     | <b>GO Annotation</b> | <b>p-value</b> |
| pigment binding                                    | GO:0031409           | 6.23E-19       |
| chlorophyll binding                                | GO:0016168           | 1.43E-16       |
| tetrapyrrole binding                               | GO:0046906           | 1.4425E-05     |
| oxidoreductase activity                            | GO:0016628           | 0.025587703    |
| <b>Cell compartment</b>                            |                      |                |
| <b>GO Term</b>                                     | <b>GO Annotation</b> | <b>p-value</b> |
| photosystem I                                      | GO:0009522           | 5.61E-27       |
| plastid thylakoid                                  | GO:0031976           | 5.67E-27       |
| chloroplast thylakoid                              | GO:0009534           | 7.79E-27       |

|                                                |            |             |
|------------------------------------------------|------------|-------------|
| thylakoid                                      | GO:0009579 | 2.31E-26    |
| photosystem                                    | GO:0009521 | 1.55E-25    |
| plastid thylakoid membrane                     | GO:0055035 | 3.20E-23    |
| chloroplast thylakoid membrane                 | GO:0009535 | 3.41E-23    |
| thylakoid membrane                             | GO:0042651 | 1.86E-22    |
| photosynthetic membrane                        | GO:0034357 | 1.97E-22    |
| chloroplast part                               | GO:0044434 | 3.96E-22    |
| thylakoid part                                 | GO:0044436 | 4.50E-22    |
| organelle subcompartment                       | GO:0031984 | 4.79E-22    |
| plastid part                                   | GO:0044435 | 1.32E-21    |
| plastoglobule                                  | GO:0010287 | 4.78E-20    |
| light-harvesting complex                       | GO:0030076 | 7.96E-18    |
| chloroplast envelope                           | GO:0009941 | 8.15E-18    |
| plastid envelope                               | GO:0009526 | 2.10E-17    |
| chloroplast stroma                             | GO:0009570 | 2.24E-14    |
| intracellular organelle part                   | GO:0044446 | 2.46E-14    |
| organelle part                                 | GO:0044422 | 2.81E-14    |
| photosystem II                                 | GO:0009523 | 4.52E-14    |
| plastid stroma                                 | GO:0009532 | 8.85E-14    |
| plastid                                        | GO:0009536 | 1.60E-13    |
| chloroplast                                    | GO:0009507 | 1.24E-12    |
| envelope                                       | GO:0031975 | 6.97E-12    |
| organelle envelope                             | GO:0031967 | 7.04E-12    |
| membrane protein complex                       | GO:0098796 | 1.38E-10    |
| membrane                                       | GO:0016020 | 6.96E-09    |
| cytoplasmic part                               | GO:0044444 | 1.12E-08    |
| cytoplasm                                      | GO:0005737 | 5.33E-07    |
| macromolecular complex                         | GO:0032991 | 8.12E-07    |
| photosystem I reaction center                  | GO:0009538 | 2.05082E-06 |
| protein complex                                | GO:0043234 | 0.000623038 |
| photosystem II antenna complex                 | GO:0009783 | 0.00338651  |
| membrane part                                  | GO:0044425 | 0.006706641 |
| integral component of membrane                 | GO:0016021 | 0.007946083 |
| chloroplast thylakoid membrane protein complex | GO:0098807 | 0.008141248 |
| intracellular ribonucleoprotein complex        | GO:0030529 | 0.013895558 |
| ribonucleoprotein complex                      | GO:1990904 | 0.013895558 |
| intrinsic component of membrane                | GO:0031224 | 0.016362585 |
| cell periphery                                 | GO:0071944 | 0.017709796 |
| cell-cell junction                             | GO:0005911 | 0.019623792 |
| cell junction                                  | GO:0030054 | 0.019623792 |
| cell part                                      | GO:0044464 | 0.019966572 |
| plasmodesma                                    | GO:0009506 | 0.020005906 |
| symplast                                       | GO:0055044 | 0.020005906 |
| cell                                           | GO:0005623 | 0.022080537 |
| chloroplast photosystem II                     | GO:0030095 | 0.022823861 |

|                                              |            |             |
|----------------------------------------------|------------|-------------|
| non-membrane-bounded organelle               | GO:0043228 | 0.022958631 |
| intracellular non-membrane-bounded organelle | GO:0043232 | 0.022958631 |
| cytosol                                      | GO:0005829 | 0.023594558 |
| organelle                                    | GO:0043226 | 0.025609296 |
| intracellular organelle                      | GO:0043229 | 0.025722053 |
| nucleolus                                    | GO:0005730 | 0.026025793 |
| ribosome                                     | GO:0005840 | 0.026106284 |
| cell wall                                    | GO:0005618 | 0.026886069 |
| external encapsulating structure             | GO:0030312 | 0.026886069 |
| chloroplast membrane                         | GO:0031969 | 0.031620021 |
| membrane-bounded organelle                   | GO:0043227 | 0.036306654 |
| intracellular membrane-bounded organelle     | GO:0043231 | 0.03641433  |
| plastid membrane                             | GO:0042170 | 0.036481998 |
| apoplast                                     | GO:0048046 | 0.041207145 |
| plasma membrane                              | GO:0005886 | 0.0462473   |
| cytosolic ribosome                           | GO:0022626 | 0.047006336 |



**Supplemental Table S5. Expression of histone modifying enzymes in *3h1*.**

| Gene name                               | Gene ID   | Total counts | P-value ( <i>3h1</i> vs. wt) | Ratio ( <i>3h1</i> vs. wt) | Fold change ( <i>3h1</i> vs. wt) |
|-----------------------------------------|-----------|--------------|------------------------------|----------------------------|----------------------------------|
| <b>HDAC - histone deacetylases</b>      |           |              |                              |                            |                                  |
| HDA19                                   | AT4G38130 | 4.55E+00     | 9.77E-01                     | 1.00E+00                   | 1.00E+00                         |
| HDA6                                    | AT5G63110 | 1.97E+00     | 9.01E-01                     | 9.52E-01                   | -1.05E+00                        |
| HDA7                                    | AT5G35600 | 1.03E-01     | 1.73E-01                     | 6.79E-01                   | -1.47E+00                        |
| HDA9                                    | AT3G44680 | 1.15E+00     | 9.63E-01                     | 1.01E+00                   | 1.01E+00                         |
| HDA5                                    | AT5G61060 | 2.75E+00     | 3.82E-04                     | 7.34E-01                   | -1.36E+00                        |
| HDA15                                   | AT3G18520 | 1.60E+00     | 9.33E-01                     | 1.07E+00                   | 1.07E+00                         |
| HDA18                                   | AT5G61070 | 1.19E+00     | 9.88E-04                     | 4.55E+00                   | 4.55E+00                         |
| HDA2                                    | AT5G26040 | 8.62E-01     | 9.97E-01                     | 9.90E-01                   | -1.01E+00                        |
| HDA8                                    | AT1G08460 | 1.52E+00     | 4.71E-01                     | 8.86E-01                   | -1.13E+00                        |
| HDA14                                   | AT4G33470 | 2.91E+00     | 8.39E-01                     | 9.46E-01                   | -1.06E+00                        |
| HDA10                                   | AT3G44660 | na           | na                           | na                         | na                               |
| HDA17                                   | AT3G44490 | na           | na                           | na                         | na                               |
| HD2A                                    | AT3G44750 | 1.55E+00     | 6.90E-01                     | 9.54E-01                   | -1.05E+00                        |
| HD2B                                    | AT5G22650 | 3.73E+00     | 1.48E-01                     | 1.21E+00                   | 1.21E+00                         |
| HD2C                                    | AT5G03740 | 2.75E+00     | 3.77E-01                     | 8.92E-01                   | -1.12E+00                        |
| HD2D                                    | AT2G27840 | 9.24E-01     | 3.98E-01                     | 1.17E+00                   | 1.17E+00                         |
| SRT1                                    | AT5G55760 | 5.31E-01     | 5.03E-01                     | 1.15E+00                   | 1.15E+00                         |
| SRT2                                    | AT5G09230 | 8.57E-01     | 8.07E-01                     | 9.38E-01                   | -1.07E+00                        |
| <b>HAT - histone acetyltransferases</b> |           |              |                              |                            |                                  |
| HAC1                                    | AT1G79000 | 1.12E+01     | 4.58E-01                     | 9.02E-01                   | -1.11E+00                        |
| HAC2                                    | AT1G67220 | 2.24E+00     | 3.02E-04                     | 2.25E+00                   | 2.25E+00                         |
| HAC4                                    | AT1G55970 | 1.45E+00     | 9.84E-01                     | 9.78E-01                   | -1.02E+00                        |
| HAC5                                    | AT3G12980 | 6.24E+00     | 3.78E-01                     | 8.99E-01                   | -1.11E+00                        |
| HAC12                                   | AT1G16710 | 7.25E+00     | 5.38E-01                     | 9.37E-01                   | -1.07E+00                        |
| HAF1                                    | AT1G32750 | 1.01E+01     | 5.33E-01                     | 1.03E+00                   | 1.03E+00                         |
| HAF2                                    | AT3G19040 | 6.40E-01     | 6.91E-01                     | 1.37E+00                   | 1.37E+00                         |
| HAG1                                    | AT3G54610 | 6.16E-01     | 1.13E-01                     | 1.44E+00                   | 1.44E+00                         |
| HAG2                                    | AT5G56740 | 1.46E+00     | 8.46E-01                     | 9.74E-01                   | -1.03E+00                        |
| HAG3                                    | AT5G50320 | 2.15E+00     | 9.48E-01                     | 1.01E+00                   | 1.01E+00                         |
| HAG4                                    | AT5G64610 | 2.31E+00     | 3.37E-01                     | 1.04E+00                   | 1.04E+00                         |
| HAG5                                    | AT5G09740 | 9.90E-01     | 8.52E-01                     | 1.01E+00                   | 1.01E+00                         |
| <b>HMT - Histone methyltransferases</b> |           |              |                              |                            |                                  |
| CLF                                     | AT2G23380 | na           | na                           | na                         | na                               |
| SWN                                     | AT4G02020 | 4.41E+00     | 6.76E-01                     | 1.06E+00                   | 1.06E+00                         |
| MEA                                     | AT1G02580 | 2.49E-01     | 3.12E-01                     | 1.68E+00                   | 1.68E+00                         |
| ASHH1/<br>SDG28                         | AT1G76710 | 8.92E-01     | 7.30E-01                     | 9.14E-01                   | -1.09E+00                        |
| ASHH2/<br>SDG8                          | AT1G77300 | 9.83E+00     | 7.30E-01                     | 1.05E+00                   | 1.05E+00                         |

|                              |           |          |          |          |           |
|------------------------------|-----------|----------|----------|----------|-----------|
| ASHH3                        | AT2G44150 | 1.05E+00 | 9.66E-01 | 9.80E-01 | -1.02E+00 |
| ASHH4                        | AT3G59960 | 1.36E-01 | 3.66E-01 | 1.07E+00 | 1.07E+00  |
| ASHR3/<br>SDG4               | AT4G30860 | 7.48E-01 | 1.69E-02 | 1.74E+00 | 1.74E+00  |
| ATX1                         | AT2G31650 | 1.38E+00 | 6.82E-01 | 9.13E-01 | -1.10E+00 |
| ATX2                         | AT1G05830 | 3.95E+00 | 3.65E-01 | 8.97E-01 | -1.11E+00 |
| ATX3                         | AT3G61740 | 1.50E+00 | 1.12E-01 | 1.37E+00 | 1.37E+00  |
| ATX4                         | AT4G27910 | 2.09E+00 | 1.90E-01 | 1.26E+00 | 1.26E+00  |
| ATX5                         | AT5G53430 | 2.30E+00 | 3.77E-01 | 8.18E-01 | -1.22E+00 |
| ATXR3                        | AT4G15180 | 1.30E+01 | 2.51E-01 | 9.10E-01 | -1.10E+00 |
| ATXR7                        | AT5G42400 | 5.34E+00 | 4.30E-01 | 1.09E+00 | 1.09E+00  |
| ATXR5                        | AT5G09790 | 2.83E-01 | 5.80E-01 | 1.21E+00 | 1.21E+00  |
| ATXR6                        | AT5G24330 | 2.12E-01 | 3.72E-01 | 1.56E+00 | 1.56E+00  |
| SUVH1                        | AT5G04940 | 2.28E+00 | 8.73E-01 | 1.01E+00 | 1.01E+00  |
| SUVH2                        | AT2G33290 | 1.45E+00 | 4.39E-02 | 1.58E+00 | 1.58E+00  |
| SUVH3                        | AT1G73100 | 2.22E+00 | 9.09E-01 | 1.01E+00 | 1.01E+00  |
| SUVH4                        | AT5G13960 | 8.94E-01 | 9.20E-02 | 1.54E+00 | 1.54E+00  |
| SUVH5                        | AT2G35160 | 1.05E+00 | 5.64E-01 | 1.22E+00 | 1.22E+00  |
| SUVH6                        | AT2G22740 | na       |          |          |           |
| SUVH7                        | AT1G17770 | 2.53E-01 | 3.59E-01 | 2.00E+00 | 2.00E+00  |
| SUVH8                        | AT2G24740 | na       |          |          |           |
| SUVH9                        | AT4G13460 | 4.29E+00 | 6.34E-01 | 9.75E-01 | -1.03E+00 |
| SUVR1                        | AT1G04050 | 7.16E-01 | 6.49E-04 | 3.15E+00 | 3.15E+00  |
| SUVR5                        | AT2G23740 | na       |          |          |           |
| SUVR2                        | AT5G43990 | 1.12E+00 | 7.54E-01 | 9.31E-01 | -1.07E+00 |
| SUVR3                        | AT3G03750 | 7.91E-01 | 5.08E-01 | 7.98E-01 | -1.25E+00 |
| SUVR4                        | AT3G04380 | 6.30E-01 | 3.96E-02 | 1.94E+00 | 1.94E+00  |
| <b>H3K27me3 demethylases</b> |           |          |          |          |           |
| ELF6/JMJ11                   | AT5G04240 | 5.44E+00 | 6.49E-01 | 9.59E-01 | -1.04E+00 |
| REF6/JMJ12                   | AT3G48430 | 6.18E+00 | 6.97E-01 | 1.06E+00 | 1.06E+00  |
| JMJ13                        | AT5G46910 | 1.29E+00 | 4.13E-01 | 1.24E+00 | 1.24E+00  |
